# Supplementary material for: Genomic analyses identify significant genes and processes in adrenocortical carcinoma cells with overexpressed Ptch1
Source: Research Square preprint supplement (doi:10.21203/rs.3.rs-1315756/v1), 2022-02-01
Supplement: Supplementary file 1 [file 5e24a84c59b963984ebb6313.xlsx]

## Sheet: result Reactome
Pathway identifier	Pathway name	#Entities found	#Entities total	Entities ratio	Entities pValue	Entities FDR	#Reactions found	#Reactions total	Reactions ratio	Species identifier	Species name	Submitted entities found	Mapped entities	Found reaction identifiers
R-HSA-9648895	Response of EIF2AK1 (HRI) to heme deficiency	7	29	0.00203209	0.0167734	0.880731	7	20	0.00147308	9606	Homo sapiens	GRB10;ATF5;TRIB1;ATF3		R-HSA-9653745;R-HSA-9653894;R-HSA-9653893;R-HSA-9654792;R-HSA-9635912;R-HSA-9653742;R-HSA-9653724
R-HSA-8866904	Negative regulation of activity of TFAP2 (AP-2) family transcription factors	4	11	0.000770794	0.0179034	0.880731	3	6	0.000441924	9606	Homo sapiens	TFAP2A;KCTD1;KCTD15		R-HSA-8864343;R-HSA-3234081;R-HSA-8864361
R-HSA-1482925	Acyl chain remodelling of PG	6	26	0.00182188	0.0310886	0.880731	4	10	0.00073654	9606	Homo sapiens	44623;PLA2G12A;JMJD7-PLA2G4B;PLA2G3;PLA2G4A;44624		R-HSA-1482900;R-HSA-1602368;R-HSA-1482847;R-HSA-1482745
R-HSA-5632681	Ligand-receptor interactions	3	8	0.000560577	0.0359139	0.880731	3	4	0.000294616	9606	Homo sapiens	PTCH1;BOC;GAS1		R-HSA-5632653;R-HSA-5632652;R-HSA-5632649
R-HSA-75205	Dissolution of Fibrin Clot	4	14	0.00098101	0.0382625	0.880731	5	19	0.00139943	9606	Homo sapiens	ANXA2;SERPINE1;SERPINB8;S100A10		R-HSA-158800;R-HSA-158795;R-HSA-159001;R-HSA-158750;R-HSA-159005
R-HSA-3595172	Defective CHST3 causes SEDCJD	3	9	0.00063065	0.0479562	0.880731	1	1	7.3654e-05	9606	Homo sapiens	BGN;CSPG4;CHST3		R-HSA-3595175
R-HSA-1442490	Collagen degradation	11	69	0.00483498	0.0493709	0.880731	20	34	0.00250424	9606	Homo sapiens	MMP11;COL3A1;COL15A1;CTSO;COL2A1;MME;COL5A1;COL25A1;COL23A1;COL9A3;CTSB		R-HSA-2471621;R-HSA-1474196;R-HSA-1474197;R-HSA-1564179;R-HSA-2168038;R-HSA-2471842;R-HSA-1564112;R-HSA-1564184;R-HSA-2168046;R-HSA-2485111;R-HSA-1474213;R-HSA-1454757;R-HSA-1564164;R-HSA-1474210;R-HSA-2172405;R-HSA-2473584;R-HSA-1564142;R-HSA-2168923;R-HSA-2537499;R-HSA-2473594
R-HSA-8951911	RUNX3 regulates RUNX1-mediated transcription	2	4	0.000280289	0.0504782	0.880731	2	2	0.000147308	9606	Homo sapiens	RUNX1		R-HSA-8951926;R-HSA-8951910
R-HSA-447041	CHL1 interactions	3	10	0.000700722	0.0617145	0.880731	5	5	0.00036827	9606	Homo sapiens	CHL1;CNTN6;ITGA10		R-HSA-443782;R-HSA-445088;R-HSA-445087;R-HSA-447034;R-HSA-445083
R-HSA-1482801	Acyl chain remodelling of PS	6	31	0.00217224	0.0622845	0.880731	5	8	0.000589232	9606	Homo sapiens	44623;PLA2G12A;JMJD7-PLA2G4B;PLA2G4A;44624;NES		R-HSA-1482771;R-HSA-1482691;R-HSA-1482897;R-HSA-1482636;R-HSA-1602374
R-HSA-8874081	MET activates PTK2 signaling	6	32	0.00224231	0.0701507	0.880731	1	5	0.00036827	9606	Homo sapiens	COL3A1;COL2A1;LAMB3;COL5A1;LAMC3		R-HSA-8874079
R-HSA-1482788	Acyl chain remodelling of PC	7	40	0.00280289	0.070842	0.880731	5	9	0.000662886	9606	Homo sapiens	44623;PLA2G12A;JMJD7-PLA2G4B;PLA2G3;PLA2G4A;44624;NES		R-HSA-1482533;R-HSA-1482547;R-HSA-1482862;R-HSA-1602417;R-HSA-1482856
R-HSA-2022870	Chondroitin sulfate biosynthesis	5	25	0.0017518	0.0760024	0.880731	9	9	0.000662886	9606	Homo sapiens	CSGALNACT1;CHST9;BGN;CSPG4;CHST3		R-HSA-9632034;R-HSA-2022911;R-HSA-1971487;R-HSA-9632033;R-HSA-1971482;R-HSA-2018682;R-HSA-1971483;R-HSA-2018659;R-HSA-1971491
R-HSA-196025	Formation of annular gap junctions	3	11	0.000770794	0.0770873	0.880731	2	2	0.000147308	9606	Homo sapiens	GJA1;CLTCL1;DNM1		R-HSA-196017;R-HSA-196026
R-HSA-5173214	O-glycosylation of TSR domain-containing proteins	7	41	0.00287296	0.0782995	0.880731	2	2	0.000147308	9606	Homo sapiens	ADAMTS4;ADAMTS15;ADAMTSL4;ADAMTS18;ADAMTS9;THSD1		R-HSA-5173005;R-HSA-5173192
R-HSA-3928663	EPHA-mediated growth cone collapse	6	33	0.00231238	0.0785632	0.880731	4	4	0.000294616	9606	Homo sapiens	LYN;EFNA2;EPHA10;FYN;MYH11;EPHA2		R-HSA-3928651;R-HSA-3928602;R-HSA-3928648;R-HSA-3928616
R-HSA-2022090	Assembly of collagen fibrils and other multimeric structures	10	67	0.00469484	0.0824731	0.880731	12	26	0.001915	9606	Homo sapiens	COL3A1;COL15A1;COL2A1;LAMB3;COL5A1;LAMC3;LOXL3;COL9A3;PCOLCE;CTSB		R-HSA-2213201;R-HSA-2213200;R-HSA-2022141;R-HSA-2213205;R-HSA-2299620;R-HSA-2395340;R-HSA-2213192;R-HSA-2213208;R-HSA-2213210;R-HSA-1474266;R-HSA-2002466;R-HSA-2396234
R-HSA-1482839	Acyl chain remodelling of PE	7	42	0.00294303	0.0861963	0.880731	5	9	0.000662886	9606	Homo sapiens	44623;PLA2G12A;JMJD7-PLA2G4B;PLA2G3;PLA2G4A;44624;NES		R-HSA-1482646;R-HSA-1482884;R-HSA-1602398;R-HSA-1482828;R-HSA-1482667
R-HSA-216083	Integrin cell surface interactions	12	86	0.00602621	0.0897983	0.880731	24	55	0.00405097	9606	Homo sapiens	COL3A1;COL2A1;COL5A1;ITGA10;ITGA11;COL23A1;FGG;SPP1;ITGA8;COL9A3;ITGA5;F11R		R-HSA-114560;R-HSA-114563;R-HSA-2473511;R-HSA-216064;R-HSA-4539779;R-HSA-216069;R-HSA-216043;R-HSA-2467436;R-HSA-216040;R-HSA-2327695;R-HSA-216045;R-HSA-4084910;R-HSA-216082;R-HSA-4086223;R-HSA-216050;R-HSA-265424;R-HSA-2752125;R-HSA-4088264;R-HSA-2426259;R-HSA-4084903;R-HSA-2752115;R-HSA-202718;R-HSA-216061;R-HSA-2752118
R-HSA-419408	Lysosphingolipid and LPA receptors	4	19	0.00133137	0.092686	0.880731	3	5	0.00036827	9606	Homo sapiens	LPAR1;S1PR3;S1PR5;LPPR1		R-HSA-419428;R-HSA-6797630;R-HSA-419389
R-HSA-190873	Gap junction degradation	3	12	0.000840866	0.0939539	0.880731	4	4	0.000294616	9606	Homo sapiens	GJA1;CLTCL1;DNM1		R-HSA-196017;R-HSA-190519;R-HSA-196026;R-HSA-190829
R-HSA-450520	HuR (ELAVL1) binds and stabilizes mRNA	3	12	0.000840866	0.0939539	0.880731	2	7	0.000515578	9606	Homo sapiens	ANP32A;ENPP2;EMB		R-HSA-450595;R-HSA-450387
R-HSA-3000171	Non-integrin membrane-ECM interactions	9	61	0.0042744	0.100984	0.880731	12	22	0.00162039	9606	Homo sapiens	COL3A1;COL2A1;LAMB3;COL5A1;LAMC3;NRXN1;SDC2;PDGFA		R-HSA-2328129;R-HSA-2426263;R-HSA-2684507;R-HSA-2396337;R-HSA-2426355;R-HSA-2465890;R-HSA-2750177;R-HSA-2327738;R-HSA-2731075;R-HSA-2731122;R-HSA-2750181;R-HSA-2731078
R-HSA-1306955	GRB7 events in ERBB2 signaling	2	6	0.000420433	0.101297	0.880731	1	1	7.3654e-05	9606	Homo sapiens	GRB7;ERBB3		R-HSA-1306953
R-HSA-5339717	Signaling by LRP5 mutants	2	6	0.000420433	0.101297	0.880731	1	1	7.3654e-05	9606	Homo sapiens	LRP5;DKK2		R-HSA-5339711
R-HSA-9706374	FLT3 signaling through SRC family kinases	2	6	0.000420433	0.101297	0.880731	2	4	0.000294616	9606	Homo sapiens	HCK;FYN		R-HSA-9609274;R-HSA-9605259
R-HSA-5660489	MTF1 activates gene expression	2	6	0.000420433	0.101297	0.880731	2	4	0.000294616	9606	Homo sapiens	CSRP1		R-HSA-5660503;R-HSA-5660514
R-HSA-186797	Signaling by PDGF	10	70	0.00490505	0.101989	0.880731	26	31	0.00228327	9606	Homo sapiens	GRB7;COL3A1;COL2A1;COL5A1;PDGFD;STAT3;SPP1;PDGFA;COL9A3		R-HSA-186819;R-HSA-1524182;R-HSA-186826;R-HSA-1524186;R-HSA-186765;R-HSA-186834;R-HSA-186773;R-HSA-186778;R-HSA-389086;R-HSA-186780;R-HSA-389083;R-HSA-382053;R-HSA-382052;R-HSA-382055;R-HSA-382054;R-HSA-186785;R-HSA-8864036;R-HSA-382061;R-HSA-380780;R-HSA-380782;R-HSA-382057;R-HSA-382056;R-HSA-382058;R-HSA-186800;R-HSA-8865276;R-HSA-9674093
R-HSA-419037	NCAM1 interactions	7	44	0.00308318	0.103293	0.880731	4	10	0.00073654	9606	Homo sapiens	COL3A1;COL2A1;COL5A1;ST8SIA4;CNTN2;COL9A3;CACNA1G		R-HSA-375157;R-HSA-422454;R-HSA-525833;R-HSA-375151
R-HSA-8948216	Collagen chain trimerization	7	44	0.00308318	0.103293	0.880731	9	28	0.00206231	9606	Homo sapiens	COL3A1;COL15A1;COL2A1;COL5A1;COL25A1;COL23A1;COL9A3		R-HSA-8944216;R-HSA-8944250;R-HSA-8944266;R-HSA-8944220;R-HSA-8944223;R-HSA-8944240;R-HSA-8944229;R-HSA-8944230;R-HSA-8944263
R-HSA-9013508	NOTCH3 Intracellular Domain Regulates Transcription	6	36	0.0025226	0.107017	0.880731	5	22	0.00162039	9606	Homo sapiens	HEYL;WWC1;HEY2		R-HSA-9021480;R-HSA-9014141;R-HSA-9013488;R-HSA-9021478;R-HSA-9017398
R-HSA-451308	Activation of Ca-permeable Kainate Receptor	3	13	0.000910938	0.112181	0.880731	2	2	0.000147308	9606	Homo sapiens	GRIK4;GRIK2		R-HSA-451283;R-HSA-451311
R-HSA-452723	Transcriptional regulation of pluripotent stem cells	7	45	0.00315325	0.11248	0.880731	12	35	0.00257789	9606	Homo sapiens	EPAS1;SALL4;STAT3;GATA6		R-HSA-452838;R-HSA-1112609;R-HSA-2972956;R-HSA-452515;R-HSA-2972968;R-HSA-2972952;R-HSA-452958;R-HSA-452894;R-HSA-480301;R-HSA-2895778;R-HSA-452392;R-HSA-480520
R-HSA-1474228	Degradation of the extracellular matrix	18	148	0.0103707	0.121034	0.880731	38	105	0.00773367	9606	Homo sapiens	COL15A1;LAMB3;MME;COL25A1;LAMC3;COL23A1;ADAMTS4;MMP11;COL3A1;CTSO;COL2A1;COL5A1;ADAMTS18;CAPN5;SPP1;COL9A3;ADAMTS9;CTSB		R-HSA-1474196;R-HSA-4086205;R-HSA-1474197;R-HSA-1564179;R-HSA-3791295;R-HSA-2168038;R-HSA-2471842;R-HSA-1564112;R-HSA-1604752;R-HSA-3791155;R-HSA-1564184;R-HSA-2168046;R-HSA-2485111;R-HSA-3788075;R-HSA-1566981;R-HSA-1564164;R-HSA-1566979;R-HSA-2172405;R-HSA-2473584;R-HSA-8848658;R-HSA-1592270;R-HSA-2473594;R-HSA-2471621;R-HSA-1592314;R-HSA-1566962;R-HSA-1454781;R-HSA-1602484;R-HSA-1592310;R-HSA-1…
R-HSA-4420332	Defective B3GALT6 causes EDSP2 and SEMDJL1	4	21	0.00147152	0.121114	0.880731	1	1	7.3654e-05	9606	Homo sapiens	SDC2;BGN;CSPG4;GPC4		R-HSA-4420365
R-HSA-3560783	Defective B4GALT7 causes EDS, progeroid type	4	21	0.00147152	0.121114	0.880731	1	1	7.3654e-05	9606	Homo sapiens	SDC2;BGN;CSPG4;GPC4		R-HSA-3560804
R-HSA-3928665	EPH-ephrin mediated repulsion of cells	8	55	0.00385397	0.12412	0.880731	9	9	0.000662886	9606	Homo sapiens	LYN;EFNA2;EPHA10;CLTCL1;FYN;DNM1;EPHB3;EPHA2		R-HSA-4093327;R-HSA-3928607;R-HSA-3928654;R-HSA-3928604;R-HSA-3928642;R-HSA-3928657;R-HSA-3928656;R-HSA-3928660;R-HSA-3928628
R-HSA-447038	NrCAM interactions	2	7	0.000490505	0.130301	0.880731	4	4	0.000294616	9606	Homo sapiens	CNTN2;NRCAM		R-HSA-447030;R-HSA-376134;R-HSA-549060;R-HSA-445067
R-HSA-8866376	Reelin signalling pathway	2	7	0.000490505	0.130301	0.880731	4	4	0.000294616	9606	Homo sapiens	RELN;FYN		R-HSA-8855237;R-HSA-8854466;R-HSA-8855232;R-HSA-8855259
R-HSA-8939245	RUNX1 regulates transcription of genes involved in BCR signaling	2	7	0.000490505	0.130301	0.880731	4	4	0.000294616	9606	Homo sapiens	PAX5;RUNX1		R-HSA-8938987;R-HSA-8938930;R-HSA-8938965;R-HSA-8938951
R-HSA-165158	Activation of AKT2	2	7	0.000490505	0.130301	0.880731	3	3	0.000220962	9606	Homo sapiens	TRIB1;PDK1		R-HSA-109701;R-HSA-109700;R-HSA-109702
R-HSA-9032759	NTRK2 activates RAC1	2	7	0.000490505	0.130301	0.880731	2	2	0.000147308	9606	Homo sapiens	DOCK3;FYN		R-HSA-9032761;R-HSA-9032798
R-HSA-451306	Ionotropic activity of kainate receptors	3	14	0.00098101	0.131626	0.880731	4	4	0.000294616	9606	Homo sapiens	GRIK4;GRIK2		R-HSA-451283;R-HSA-451310;R-HSA-451311;R-HSA-451309
R-HSA-6794362	Protein-protein interactions at synapses	12	93	0.00651671	0.134786	0.880731	20	33	0.00243058	9606	Homo sapiens	GRIN2A;NLGN1;NLGN4X;LRRTM3;SLITRK4;NRXN1;SLITRK3;SLITRK5;DLGAP1;SHANK1;GRIA4		R-HSA-6794338;R-HSA-6794336;R-HSA-6797568;R-HSA-6794351;R-HSA-6794349;R-HSA-6794348;R-HSA-6797803;R-HSA-6794346;R-HSA-6794345;R-HSA-6794344;R-HSA-8849878;R-HSA-6797974;R-HSA-6794357;R-HSA-6794356;R-HSA-8849906;R-HSA-6794354;R-HSA-6797554;R-HSA-6794353;R-HSA-6794352;R-HSA-8849881
R-HSA-3560801	Defective B3GAT3 causes JDSSDHD	4	22	0.00154159	0.136568	0.880731	1	1	7.3654e-05	9606	Homo sapiens	SDC2;BGN;CSPG4;GPC4		R-HSA-3560802
R-HSA-5083635	Defective B3GALTL causes PpS	6	39	0.00273281	0.140051	0.880731	1	1	7.3654e-05	9606	Homo sapiens	ADAMTS4;ADAMTS15;ADAMTSL4;ADAMTS18;ADAMTS9;THSD1		R-HSA-6785565
R-HSA-68616	Assembly of the ORC complex at the origin of replication	6	40	0.00280289	0.152004	0.880731	7	11	0.000810194	9606	Homo sapiens	HIST1H2BJ;ORC2;HIST1H2AD;HIST1H2BG;HIST1H3D		R-HSA-68611;R-HSA-68595;R-HSA-68610;R-HSA-68615;R-HSA-9749197;R-HSA-68603;R-HSA-9749098
R-HSA-75158	TRAIL signaling	2	8	0.000560577	0.160915	0.880731	6	6	0.000441924	9606	Homo sapiens	TNFRSF10B		R-HSA-141139;R-HSA-75187;R-HSA-141316;R-HSA-75238;R-HSA-5635741;R-HSA-75146
R-HSA-166665	Terminal pathway of complement	2	8	0.000560577	0.160915	0.880731	4	5	0.00036827	9606	Homo sapiens	C7;CLU		R-HSA-173723;R-HSA-173720;R-HSA-173725;R-HSA-173709
R-HSA-5250992	Toxicity of botulinum toxin type E (botE)	2	8	0.000560577	0.160915	0.880731	4	5	0.00036827	9606	Homo sapiens	SNAP25;SV2A		R-HSA-194800;R-HSA-5244500;R-HSA-5244503;R-HSA-5244506
R-HSA-5635851	GLI proteins bind promoters of Hh responsive genes to promote transcription	2	8	0.000560577	0.160915	0.880731	2	4	0.000294616	9606	Homo sapiens	PTCH1;BOC		R-HSA-5635848;R-HSA-5635850
R-HSA-8852405	Signaling by MST1	2	8	0.000560577	0.160915	0.880731	1	4	0.000294616	9606	Homo sapiens	SPINT1;SPINT2		R-HSA-6800198
R-HSA-8877627	Vitamin E	1	2	0.000140144	0.16364	0.880731	2	2	0.000147308	9606	Homo sapiens	TTPA		R-HSA-8874705;R-HSA-8874718
R-HSA-373756	SDK interactions	1	2	0.000140144	0.16364	0.880731	1	2	0.000147308	9606	Homo sapiens	SDK1		R-HSA-373745
R-HSA-1474244	Extracellular matrix organization	35	329	0.0230537	0.169358	0.880731	147	319	0.0234956	9606	Homo sapiens	COL15A1;LAMC3;NRXN1;SDC2;SERPINE1;LOXL3;PDGFA;F11R;ADAMTS4;CTSO;SH3PXD2A;ADAMTS18;CAPN5;SPP1;ADAMTS9;CTSB;LAMB3;MME;COL25A1;COL23A1;FGG;BGN;PCOLCE;GDF5;MMP11;COL3A1;COL2A1;COL5A1;ITGA10;ITGA11;MFAP2;ITGA8;COL9A3;ITGA5		R-HSA-2002460;R-HSA-8944266;R-HSA-2473511;R-HSA-216064;R-HSA-1564179;R-HSA-216069;R-HSA-3791155;R-HSA-1564184;R-HSA-8944263;R-HSA-2426676;R-HSA-216082;R-HSA-3788075;R-HSA-1566981;R-HSA-1564164;R-HSA-1566979;R-HSA-2002440;R-HSA-2466106;R-HSA-4084505;R-HSA-1592362;R-HSA-8941234;R-HSA-2002466;R-HSA-2537499;R-HSA-2327909;R-HSA-2465890;R-HSA-2467436;R-HSA-2485111;R-HSA-2752125;R-HSA-2473584;R-HSA-1980…
R-HSA-6794361	Neurexins and neuroligins	8	60	0.00420433	0.173222	0.880731	16	19	0.00139943	9606	Homo sapiens	GRIN2A;NLGN1;NLGN4X;LRRTM3;NRXN1;DLGAP1;SHANK1		R-HSA-6794338;R-HSA-6794336;R-HSA-6797568;R-HSA-6794351;R-HSA-6794349;R-HSA-6794348;R-HSA-6794346;R-HSA-6794345;R-HSA-6794344;R-HSA-6797974;R-HSA-6794357;R-HSA-6794356;R-HSA-6794354;R-HSA-6797554;R-HSA-6794353;R-HSA-6794352
R-HSA-75892	Platelet Adhesion to exposed collagen	3	16	0.00112115	0.17359	0.880731	3	6	0.000441924	9606	Homo sapiens	LYN;ITGA10;FYN		R-HSA-114577;R-HSA-432295;R-HSA-114563
R-HSA-75876	Synthesis of very long-chain fatty acyl-CoAs	7	51	0.00357368	0.175911	0.880731	6	12	0.000883848	9606	Homo sapiens	ELOVL2;HSD17B3;ACSBG1;ELOVL6;ACSL4;PTPLA		R-HSA-5695957;R-HSA-548843;R-HSA-548814;R-HSA-548800;R-HSA-548818;R-HSA-5676637
R-HSA-8866654	E3 ubiquitin ligases ubiquitinate target proteins	8	61	0.0042744	0.183963	0.880731	10	16	0.00117846	9606	Homo sapiens	RNF144A;HIST1H2BJ;UBE2E1;UBE2E2;PAF1;HIST1H2BG;RNF152		R-HSA-8953946;R-HSA-8939323;R-HSA-8938829;R-HSA-8953917;R-HSA-8938815;R-HSA-8938770;R-HSA-8942099;R-HSA-8942101;R-HSA-8938773;R-HSA-8939335
R-HSA-1482922	Acyl chain remodelling of PI	4	25	0.0017518	0.187151	0.880731	2	6	0.000441924	9606	Homo sapiens	PLA2G12A;44623;PLA2G4A;44624		R-HSA-1602377;R-HSA-1482825
R-HSA-140875	Common Pathway of Fibrin Clot Formation	4	25	0.0017518	0.187151	0.880731	8	29	0.00213597	9606	Homo sapiens	THBD;TG;F2R;FGG		R-HSA-140851;R-HSA-141040;R-HSA-141046;R-HSA-140599;R-HSA-5607058;R-HSA-140842;R-HSA-140840;R-HSA-140847
R-HSA-9616222	Transcriptional regulation of granulopoiesis	9	71	0.00497512	0.189681	0.880731	8	27	0.00198866	9606	Homo sapiens	HIST1H2BJ;STAT3;MYB;LEF1;HIST1H2AD;HIST1H2BG;HIST1H3D;RUNX1		R-HSA-9622386;R-HSA-9616243;R-HSA-9616214;R-HSA-8865505;R-HSA-9617194;R-HSA-9618584;R-HSA-9617209;R-HSA-9634445
R-HSA-73728	RNA Polymerase I Promoter Opening	5	34	0.00238245	0.190903	0.880731	1	2	0.000147308	9606	Homo sapiens	HIST1H2BJ;HIST1H2AD;HIST1H2BG;HIST1H3D		R-HSA-73718
R-HSA-447043	Neurofascin interactions	2	9	0.00063065	0.192652	0.880731	7	7	0.000515578	9606	Homo sapiens	NFASC;NRCAM		R-HSA-373733;R-HSA-373729;R-HSA-445091;R-HSA-373730;R-HSA-443774;R-HSA-437243;R-HSA-373738
R-HSA-434313	Intracellular metabolism of fatty acids regulates insulin secretion	2	9	0.00063065	0.192652	0.880731	2	2	0.000147308	9606	Homo sapiens	ACSL4;CD36		R-HSA-434382;R-HSA-434381
R-HSA-427975	Proton/oligopeptide cotransporters	2	9	0.00063065	0.192652	0.880731	2	2	0.000147308	9606	Homo sapiens	SLC15A2;SLC15A3		R-HSA-428007;R-HSA-427998
R-HSA-3595174	Defective CHST14 causes EDS, musculocontractural type	2	9	0.00063065	0.192652	0.880731	1	1	7.3654e-05	9606	Homo sapiens	BGN;CSPG4		R-HSA-3636919
R-HSA-8857538	PTK6 promotes HIF1A stabilization	2	9	0.00063065	0.192652	0.880731	4	6	0.000441924	9606	Homo sapiens	LRRK2;LINC01139		R-HSA-8857583;R-HSA-8857565;R-HSA-9634702;R-HSA-8857577
R-HSA-164944	Nef and signal transduction	2	9	0.00063065	0.192652	0.880731	2	5	0.00036827	9606	Homo sapiens	HCK;FYN		R-HSA-200858;R-HSA-200908
R-HSA-6806942	MET Receptor Activation	2	9	0.00063065	0.192652	0.880731	2	5	0.00036827	9606	Homo sapiens	SPINT1;SPINT2		R-HSA-6800299;R-HSA-6800200
R-HSA-8874211	CREB3 factors activate genes	2	9	0.00063065	0.192652	0.880731	8	21	0.00154673	9606	Homo sapiens	CREB3L1;MBTPS2		R-HSA-8874212;R-HSA-8874195;R-HSA-8874194;R-HSA-8874193;R-HSA-8874192;R-HSA-8874187;R-HSA-8874201;R-HSA-8874184
R-HSA-9012852	Signaling by NOTCH3	8	63	0.00441455	0.206267	0.880731	8	37	0.0027252	9606	Homo sapiens	HEYL;NEURL1B;WWC1;HEY2;DLL1		R-HSA-9021480;R-HSA-9014141;R-HSA-9013069;R-HSA-9013488;R-HSA-157145;R-HSA-9013284;R-HSA-9021478;R-HSA-9017398
R-HSA-8875878	MET promotes cell motility	6	45	0.00315325	0.217821	0.880731	1	12	0.000883848	9606	Homo sapiens	COL3A1;COL2A1;LAMB3;COL5A1;LAMC3		R-HSA-8874079
R-HSA-6803211	TP53 Regulates Transcription of Death Receptors and Ligands	3	18	0.0012613	0.218687	0.880731	2	7	0.000515578	9606	Homo sapiens	TNFRSF10B		R-HSA-5633414;R-HSA-5633441
R-HSA-5334118	DNA methylation	5	36	0.0025226	0.222121	0.880731	7	7	0.000515578	9606	Homo sapiens	HIST1H2BJ;HIST1H2AD;HIST1H2BG;HIST1H3D		R-HSA-5334097;R-HSA-5334160;R-HSA-5334099;R-HSA-5334179;R-HSA-5334164;R-HSA-5334151;R-HSA-5334152
R-HSA-438066	Unblocking of NMDA receptors, glutamate binding and activation	4	27	0.00189195	0.223721	0.880731	5	5	0.00036827	9606	Homo sapiens	CAMK2B;GRIN2A;NEFL;GRIA4		R-HSA-432164;R-HSA-438037;R-HSA-432162;R-HSA-432172;R-HSA-9614185
R-HSA-203641	NOSTRIN mediated eNOS trafficking	2	10	0.000700722	0.225097	0.880731	4	4	0.000294616	9606	Homo sapiens	NOS3;NOSTRIN		R-HSA-203716;R-HSA-203625;R-HSA-203662;R-HSA-203565
R-HSA-418886	Netrin mediated repulsion signals	2	10	0.000700722	0.225097	0.880731	4	4	0.000294616	9606	Homo sapiens	UNC5B;UNC5C		R-HSA-373751;R-HSA-373713;R-HSA-418863;R-HSA-418859
R-HSA-1912399	Pre-NOTCH Processing in the Endoplasmic Reticulum	2	10	0.000700722	0.225097	0.880731	2	2	0.000147308	9606	Homo sapiens	POGLUT1;NOTCH4		R-HSA-1912349;R-HSA-1912353
R-HSA-3595177	Defective CHSY1 causes TPBS	2	10	0.000700722	0.225097	0.880731	2	2	0.000147308	9606	Homo sapiens	BGN;CSPG4		R-HSA-3595178;R-HSA-3595176
R-HSA-8949275	RUNX3 Regulates Immune Response and Cell Migration	2	10	0.000700722	0.225097	0.880731	1	5	0.00036827	9606	Homo sapiens	SPP1		R-HSA-8952442
R-HSA-1474290	Collagen formation	12	104	0.00728751	0.225516	0.880731	42	77	0.00567136	9606	Homo sapiens	COL3A1;COL15A1;COL2A1;LAMB3;COL5A1;COL25A1;LAMC3;COL23A1;LOXL3;COL9A3;PCOLCE;CTSB		R-HSA-8948232;R-HSA-2002460;R-HSA-8948234;R-HSA-8944266;R-HSA-2299620;R-HSA-8948224;R-HSA-8948226;R-HSA-1474266;R-HSA-8948228;R-HSA-8948230;R-HSA-8948231;R-HSA-8944263;R-HSA-8944216;R-HSA-8944220;R-HSA-1981128;R-HSA-2002440;R-HSA-1980233;R-HSA-8944223;R-HSA-1981120;R-HSA-1650808;R-HSA-2002428;R-HSA-2022141;R-HSA-2022073;R-HSA-2395340;R-HSA-2213192;R-HSA-2089971;R-HSA-8944229;R-HSA-1981104;R-HSA-2…
R-HSA-5624958	ARL13B-mediated ciliary trafficking of INPP5E	1	3	0.000210217	0.235134	0.880731	4	4	0.000294616	9606	Homo sapiens	PDE6D		R-HSA-5624956;R-HSA-5638012;R-HSA-5624953;R-HSA-5624954
R-HSA-1299316	TWIK-releated acid-sensitive K+ channel (TASK)	1	3	0.000210217	0.235134	0.880731	1	1	7.3654e-05	9606	Homo sapiens	KCNK3		R-HSA-1299318
R-HSA-5678420	Defective ABCC9 causes CMD10, ATFB12 and Cantu syndrome	1	3	0.000210217	0.235134	0.880731	1	1	7.3654e-05	9606	Homo sapiens	ABCC9		R-HSA-5678418
R-HSA-190827	Transport of connexins along the secretory pathway	1	3	0.000210217	0.235134	0.880731	1	2	0.000147308	9606	Homo sapiens	GJA1		R-HSA-190686
R-HSA-190704	Oligomerization of connexins into connexons	1	3	0.000210217	0.235134	0.880731	1	3	0.000220962	9606	Homo sapiens	GJA1		R-HSA-190662
R-HSA-9657689	Defective SERPING1 causes hereditary angioedema	1	3	0.000210217	0.235134	0.880731	1	3	0.000220962	9606	Homo sapiens	F12		R-HSA-9651456
R-HSA-170670	Adenylate cyclase inhibitory pathway	3	19	0.00133137	0.242063	0.880731	5	5	0.00036827	9606	Homo sapiens	GNAL;GNAT3;ADCY2		R-HSA-170674;R-HSA-170666;R-HSA-392206;R-HSA-170686;R-HSA-170671
R-HSA-9032500	Activated NTRK2 signals through FYN	2	11	0.000770794	0.257898	0.880731	7	7	0.000515578	9606	Homo sapiens	DOCK3;FYN		R-HSA-9032601;R-HSA-9032761;R-HSA-9032798;R-HSA-9037040;R-HSA-9032532;R-HSA-9032582;R-HSA-9032502
R-HSA-3785653	Myoclonic epilepsy of Lafora	2	11	0.000770794	0.257898	0.880731	2	2	0.000147308	9606	Homo sapiens	PPP1R3C;NHLRC1		R-HSA-3797226;R-HSA-3791349
R-HSA-8939242	RUNX1 regulates transcription of genes involved in differentiation of keratinocytes	2	11	0.000770794	0.257898	0.880731	7	8	0.000589232	9606	Homo sapiens	CTSO;RUNX1		R-HSA-8938121;R-HSA-8955885;R-HSA-8955822;R-HSA-8938063;R-HSA-8955748;R-HSA-8955893;R-HSA-8938053
R-HSA-446107	Type I hemidesmosome assembly	2	11	0.000770794	0.257898	0.880731	4	6	0.000441924	9606	Homo sapiens	LAMB3;LAMC3		R-HSA-446083;R-HSA-432956;R-HSA-446077;R-HSA-446089
R-HSA-111453	BH3-only proteins associate with and inactivate anti-apoptotic BCL-2 members	2	11	0.000770794	0.257898	0.880731	2	4	0.000294616	9606	Homo sapiens	STAT3;BMF		R-HSA-508163;R-HSA-6790025
R-HSA-388844	Receptor-type tyrosine-protein phosphatases	3	20	0.00140144	0.265818	0.880731	1	6	0.000441924	9606	Homo sapiens	SLITRK4;SLITRK3;SLITRK5		R-HSA-6797803
R-HSA-5635838	Activation of SMO	3	20	0.00140144	0.265818	0.880731	1	9	0.000662886	9606	Homo sapiens	PTCH1;BOC;GAS1		R-HSA-5632668
R-HSA-2644603	Signaling by NOTCH1 in Cancer	8	68	0.00476491	0.266136	0.880731	13	39	0.0028725	9606	Homo sapiens	HDAC4;HEYL;NEURL1B;HEY2;HDAC9;DLL1		R-HSA-2900748;R-HSA-2769007;R-HSA-2737728;R-HSA-2730752;R-HSA-2900765;R-HSA-2220976;R-HSA-2220944;R-HSA-4396402;R-HSA-2220981;R-HSA-2220982;R-HSA-2769008;R-HSA-2691219;R-HSA-2660819
R-HSA-2894862	Constitutive Signaling by NOTCH1 HD+PEST Domain Mutants	8	68	0.00476491	0.266136	0.880731	6	21	0.00154673	9606	Homo sapiens	HDAC4;HEYL;NEURL1B;HEY2;HDAC9;DLL1		R-HSA-2900748;R-HSA-2900765;R-HSA-2220976;R-HSA-4396402;R-HSA-2220981;R-HSA-2220982
R-HSA-2644606	Constitutive Signaling by NOTCH1 PEST Domain Mutants	8	68	0.00476491	0.266136	0.880731	6	21	0.00154673	9606	Homo sapiens	HDAC4;HEYL;NEURL1B;HEY2;HDAC9;DLL1		R-HSA-2220944;R-HSA-4396402;R-HSA-2220981;R-HSA-2769007;R-HSA-2220982;R-HSA-2769008
R-HSA-2894858	Signaling by NOTCH1 HD+PEST Domain Mutants in Cancer	8	68	0.00476491	0.266136	0.880731	6	21	0.00154673	9606	Homo sapiens	HDAC4;HEYL;NEURL1B;HEY2;HDAC9;DLL1		R-HSA-2900748;R-HSA-2900765;R-HSA-2220976;R-HSA-4396402;R-HSA-2220981;R-HSA-2220982
R-HSA-2644602	Signaling by NOTCH1 PEST Domain Mutants in Cancer	8	68	0.00476491	0.266136	0.880731	6	21	0.00154673	9606	Homo sapiens	HDAC4;HEYL;NEURL1B;HEY2;HDAC9;DLL1		R-HSA-2220944;R-HSA-4396402;R-HSA-2220981;R-HSA-2769007;R-HSA-2220982;R-HSA-2769008
R-HSA-5669034	TNFs bind their physiological receptors	4	30	0.00210217	0.281487	0.880731	3	13	0.000957502	9606	Homo sapiens	TNFSF4;TNFRSF14;TNFRSF1B		R-HSA-5675948;R-HSA-5692315;R-HSA-5669097
R-HSA-2022928	HS-GAG biosynthesis	5	40	0.00280289	0.288422	0.880731	13	14	0.00103116	9606	Homo sapiens	HS3ST3B1;SDC2;GPC4;HS3ST1		R-HSA-2076383;R-HSA-2076508;R-HSA-2076371;R-HSA-2024108;R-HSA-2022860;R-HSA-2022856;R-HSA-2076392;R-HSA-2022887;R-HSA-2022919;R-HSA-2024100;R-HSA-2076419;R-HSA-2076611;R-HSA-2022851
R-HSA-2892247	POU5F1 (OCT4), SOX2, NANOG activate genes related to proliferation	3	21	0.00147152	0.289829	0.880731	3	16	0.00117846	9606	Homo sapiens	SALL4;STAT3		R-HSA-2972956;R-HSA-452515;R-HSA-452958
R-HSA-5660526	Response to metal ions	3	21	0.00147152	0.289829	0.880731	4	31	0.00228327	9606	Homo sapiens	CSRP1;MT1E		R-HSA-5662614;R-HSA-5660503;R-HSA-5660514;R-HSA-5662595
R-HSA-5250968	Toxicity of botulinum toxin type A (botA)	2	12	0.000840866	0.290756	0.880731	4	5	0.00036827	9606	Homo sapiens	SNAP25;SV2A		R-HSA-194818;R-HSA-5244424;R-HSA-5244428;R-HSA-5244415
R-HSA-2025928	Calcineurin activates NFAT	2	12	0.000840866	0.290756	0.880731	2	3	0.000220962	9606	Homo sapiens	NFATC2;NFATC1		R-HSA-2025882;R-HSA-2025890
R-HSA-5625970	RHO GTPases activate KTN1	2	12	0.000840866	0.290756	0.880731	1	2	0.000147308	9606	Homo sapiens	KLC3		R-HSA-5672083
R-HSA-375165	NCAM signaling for neurite out-growth	8	70	0.00490505	0.291396	0.880731	12	23	0.00169404	9606	Homo sapiens	COL3A1;COL2A1;COL5A1;ST8SIA4;CNTN2;COL9A3;FYN;CACNA1G		R-HSA-375157;R-HSA-392053;R-HSA-422454;R-HSA-525833;R-HSA-392054;R-HSA-392051;R-HSA-391868;R-HSA-375151;R-HSA-391871;R-HSA-391865;R-HSA-391867;R-HSA-391866
R-HSA-9657688	Defective factor XII causes hereditary angioedema	1	4	0.000280289	0.30052	0.880731	2	2	0.000147308	9606	Homo sapiens	F12		R-HSA-9653249;R-HSA-9655046
R-HSA-2206308	MPS IV - Morquio syndrome B	1	4	0.000280289	0.30052	0.880731	2	2	0.000147308	9606	Homo sapiens	GAL		R-HSA-9036061;R-HSA-2265534
R-HSA-5678771	Defective ABCB4 causes PFIC3, ICP3 and GBD1	1	4	0.000280289	0.30052	0.880731	1	1	7.3654e-05	9606	Homo sapiens	ABCB4		R-HSA-5678749
R-HSA-844615	The AIM2 inflammasome	1	4	0.000280289	0.30052	0.880731	1	4	0.000294616	9606	Homo sapiens	CASP1		R-HSA-844618
R-HSA-1971475	A tetrasaccharide linker sequence is required for GAG synthesis	4	31	0.00217224	0.301252	0.880731	5	5	0.00036827	9606	Homo sapiens	SDC2;BGN;CSPG4;GPC4		R-HSA-1889981;R-HSA-9638064;R-HSA-1889978;R-HSA-1878002;R-HSA-1889955
R-HSA-1266695	Interleukin-7 signaling	4	31	0.00217224	0.301252	0.880731	5	26	0.001915	9606	Homo sapiens	STAT3;HIST1H3D;RAG1		R-HSA-8865711;R-HSA-8983059;R-HSA-8865613;R-HSA-8983077;R-HSA-8983078
R-HSA-4641263	Regulation of FZD by ubiquitination	3	22	0.00154159	0.313986	0.880731	6	6	0.000441924	9606	Homo sapiens	LRP5;LGR5;RSPO4		R-HSA-4641206;R-HSA-4641236;R-HSA-4641205;R-HSA-4641253;R-HSA-4641249;R-HSA-4641246
R-HSA-2022923	Dermatan sulfate biosynthesis	2	13	0.000910938	0.323422	0.880731	4	4	0.000294616	9606	Homo sapiens	BGN;CSPG4		R-HSA-2022063;R-HSA-2022061;R-HSA-2022052;R-HSA-2022065
R-HSA-9020956	Interleukin-27 signaling	2	13	0.000910938	0.323422	0.880731	12	20	0.00147308	9606	Homo sapiens	STAT3;IL27RA		R-HSA-8950441;R-HSA-8950537;R-HSA-8950716;R-HSA-8950733;R-HSA-8950766;R-HSA-8950782;R-HSA-8950271;R-HSA-8950210;R-HSA-8950340;R-HSA-448427;R-HSA-8950485;R-HSA-8950518
R-HSA-9022702	MECP2 regulates transcription of neuronal ligands	2	13	0.000910938	0.323422	0.880731	2	8	0.000589232	9606	Homo sapiens	DLL1		R-HSA-9023348;R-HSA-9023351
R-HSA-140342	Apoptosis induced DNA fragmentation	2	13	0.000910938	0.323422	0.880731	2	12	0.000883848	9606	Homo sapiens	HIST1H1C		R-HSA-211239;R-HSA-211247
R-HSA-8852135	Protein ubiquitination	9	84	0.00588606	0.338481	0.880731	12	32	0.00235693	9606	Homo sapiens	RNF144A;UBE2H;HIST1H2BJ;UBE2E1;UBE2E2;PAF1;HIST1H2BG;RNF152		R-HSA-8953946;R-HSA-8939323;R-HSA-8852130;R-HSA-8938829;R-HSA-8953917;R-HSA-8852129;R-HSA-8938815;R-HSA-8938770;R-HSA-8942099;R-HSA-8942101;R-HSA-8938773;R-HSA-8939335
R-HSA-1980143	Signaling by NOTCH1	9	84	0.00588606	0.338481	0.880731	8	39	0.0028725	9606	Homo sapiens	HDAC4;HEYL;NEURL1B;HEY2;HDAC9;DLL1;DLK1		R-HSA-157632;R-HSA-1980074;R-HSA-1980138;R-HSA-1912388;R-HSA-1980039;R-HSA-1980130;R-HSA-4396382;R-HSA-1980065
R-HSA-140877	Formation of Fibrin Clot (Clotting Cascade)	5	43	0.0030131	0.340224	0.880731	11	61	0.00449289	9606	Homo sapiens	THBD;TG;F12;F2R;FGG		R-HSA-140851;R-HSA-141040;R-HSA-141046;R-HSA-140599;R-HSA-158357;R-HSA-5607058;R-HSA-140842;R-HSA-140840;R-HSA-158313;R-HSA-140847;R-HSA-158300
R-HSA-112308	Presynaptic depolarization and calcium channel opening	2	14	0.00098101	0.355691	0.880731	1	1	7.3654e-05	9606	Homo sapiens	CACNA2D3;CACNA2D2		R-HSA-210420
R-HSA-8941332	RUNX2 regulates genes involved in cell migration	2	14	0.00098101	0.355691	0.880731	2	7	0.000515578	9606	Homo sapiens	ITGA5		R-HSA-8939667;R-HSA-8939670
R-HSA-210747	Regulation of gene expression in early pancreatic precursor cells	2	14	0.00098101	0.355691	0.880731	1	6	0.000441924	9606	Homo sapiens	NKX6-1		R-HSA-210780
R-HSA-210990	PECAM1 interactions	2	14	0.00098101	0.355691	0.880731	1	7	0.000515578	9606	Homo sapiens	LYN;FYN		R-HSA-210291
R-HSA-212300	PRC2 methylates histones and DNA	5	44	0.00308318	0.357674	0.880731	4	4	0.000294616	9606	Homo sapiens	HIST1H2BJ;HIST1H2AD;HIST1H2BG;HIST1H3D		R-HSA-212263;R-HSA-212222;R-HSA-212269;R-HSA-212252
R-HSA-1296072	Voltage gated Potassium channels	5	44	0.00308318	0.357674	0.880731	1	1	7.3654e-05	9606	Homo sapiens	KCNG1;KCND2;KCNC2;KCNC3;KCNA4		R-HSA-1296127
R-HSA-8875791	MET activates STAT3	1	5	0.000350361	0.360321	0.880731	4	4	0.000294616	9606	Homo sapiens	STAT3		R-HSA-2730595;R-HSA-8875817;R-HSA-2730599;R-HSA-8875816
R-HSA-191650	Regulation of gap junction activity	1	5	0.000350361	0.360321	0.880731	4	4	0.000294616	9606	Homo sapiens	GJA1		R-HSA-191654;R-HSA-191636;R-HSA-191656;R-HSA-190541
R-HSA-139910	Activation of BMF and translocation to mitochondria	1	5	0.000350361	0.360321	0.880731	2	2	0.000147308	9606	Homo sapiens	BMF		R-HSA-139908;R-HSA-139909
R-HSA-451307	Activation of Na-permeable kainate receptors	1	5	0.000350361	0.360321	0.880731	2	2	0.000147308	9606	Homo sapiens	GRIK2		R-HSA-451310;R-HSA-451309
R-HSA-8866906	TFAP2 (AP-2) family regulates transcription of other transcription factors	1	5	0.000350361	0.360321	0.880731	2	2	0.000147308	9606	Homo sapiens	TFAP2A		R-HSA-8864718;R-HSA-8864729
R-HSA-5579021	Defective CYP21A2 causes AH3	1	5	0.000350361	0.360321	0.880731	1	1	7.3654e-05	9606	Homo sapiens	CYP21A2		R-HSA-5601976
R-HSA-5579010	Defective CYP24A1 causes HCAI	1	5	0.000350361	0.360321	0.880731	1	1	7.3654e-05	9606	Homo sapiens	CYP24A1		R-HSA-5602004
R-HSA-8941237	Invadopodia formation	1	5	0.000350361	0.360321	0.880731	1	1	7.3654e-05	9606	Homo sapiens	SH3PXD2A		R-HSA-8941234
R-HSA-5579013	Defective CYP7B1 causes SPG5A and CBAS3	1	5	0.000350361	0.360321	0.880731	1	1	7.3654e-05	9606	Homo sapiens	CYP7B1		R-HSA-5602885
R-HSA-198745	Signalling to STAT3	1	5	0.000350361	0.360321	0.880731	1	1	7.3654e-05	9606	Homo sapiens	STAT3		R-HSA-198732
R-HSA-5368598	Negative regulation of TCF-dependent signaling by DVL-interacting proteins	1	5	0.000350361	0.360321	0.880731	1	2	0.000147308	9606	Homo sapiens	CXXC4		R-HSA-5368582
R-HSA-844623	The IPAF inflammasome	1	5	0.000350361	0.360321	0.880731	1	2	0.000147308	9606	Homo sapiens	CASP1		R-HSA-844617
R-HSA-9036866	Expression and Processing of Neurotrophins	1	5	0.000350361	0.360321	0.880731	1	5	0.00036827	9606	Homo sapiens	PCSK6		R-HSA-187020
R-HSA-167060	NGF processing	1	5	0.000350361	0.360321	0.880731	1	5	0.00036827	9606	Homo sapiens	PCSK6		R-HSA-187020
R-HSA-5576892	Phase 0 - rapid depolarisation	4	34	0.00238245	0.361208	0.880731	2	2	0.000147308	9606	Homo sapiens	CAMK2B;CACNA2D2;FGF12;SCN1B		R-HSA-5577213;R-HSA-5576895
R-HSA-171306	Packaging Of Telomere Ends	4	34	0.00238245	0.361208	0.880731	2	2	0.000147308	9606	Homo sapiens	HIST1H2BJ;HIST1H2AD;HIST1H2BG		R-HSA-181450;R-HSA-176700
R-HSA-451326	Activation of kainate receptors upon glutamate binding	4	34	0.00238245	0.361208	0.880731	5	6	0.000441924	9606	Homo sapiens	GNG4;GRIK4;GRIK2		R-HSA-451283;R-HSA-451310;R-HSA-451311;R-HSA-500717;R-HSA-451309
R-HSA-5620971	Pyroptosis	4	34	0.00238245	0.361208	0.880731	4	23	0.00169404	9606	Homo sapiens	IRF1;CASP4;CASP1		R-HSA-9710101;R-HSA-9710294;R-HSA-9647680;R-HSA-9710295
R-HSA-912631	Regulation of signaling by CBL	3	24	0.00168173	0.362324	0.880731	3	7	0.000515578	9606	Homo sapiens	LYN;HCK;FYN		R-HSA-879917;R-HSA-912629;R-HSA-912627
R-HSA-1650814	Collagen biosynthesis and modifying enzymes	8	76	0.00532549	0.369944	0.880731	30	51	0.00375635	9606	Homo sapiens	COL3A1;COL15A1;COL2A1;COL5A1;COL25A1;COL23A1;COL9A3;PCOLCE		R-HSA-8948232;R-HSA-2002460;R-HSA-8948234;R-HSA-8944266;R-HSA-8948224;R-HSA-8948226;R-HSA-8948228;R-HSA-8948230;R-HSA-8948231;R-HSA-8944263;R-HSA-8944216;R-HSA-8944220;R-HSA-1981128;R-HSA-2002440;R-HSA-1980233;R-HSA-8944223;R-HSA-1981120;R-HSA-1650808;R-HSA-2002428;R-HSA-2022073;R-HSA-2089971;R-HSA-8944229;R-HSA-1981104;R-HSA-8944230;R-HSA-8944250;R-HSA-8948219;R-HSA-2152276;R-HSA-8948222;R-HSA-8…
R-HSA-427359	SIRT1 negatively regulates rRNA expression	5	45	0.00315325	0.375153	0.880731	3	5	0.00036827	9606	Homo sapiens	HIST1H2BJ;HIST1H2AD;HIST1H2BG;HIST1H3D		R-HSA-427527;R-HSA-427514;R-HSA-427528
R-HSA-3772470	Negative regulation of TCF-dependent signaling by WNT ligand antagonists	2	15	0.00105108	0.38739	0.880731	3	5	0.00036827	9606	Homo sapiens	LRP5;DKK2		R-HSA-3769401;R-HSA-5368586;R-HSA-3769397
R-HSA-9623433	NR1H2 & NR1H3 regulate gene expression to control bile acid homeostasis	2	15	0.00105108	0.38739	0.880731	2	6	0.000441924	9606	Homo sapiens	FABP6		R-HSA-9631296;R-HSA-9607342
R-HSA-2214320	Anchoring fibril formation	2	15	0.00105108	0.38739	0.880731	1	4	0.000294616	9606	Homo sapiens	LAMB3;LAMC3		R-HSA-2396234
R-HSA-6806834	Signaling by MET	9	88	0.00616635	0.388151	0.880731	7	51	0.00375635	9606	Homo sapiens	COL3A1;COL2A1;LAMB3;COL5A1;SPINT1;LAMC3;STAT3;SPINT2		R-HSA-8874079;R-HSA-2730595;R-HSA-6800299;R-HSA-8875817;R-HSA-2730599;R-HSA-8875816;R-HSA-6800200
R-HSA-421270	Cell-cell junction organization	7	67	0.00469484	0.391429	0.880731	9	21	0.00154673	9606	Homo sapiens	CLDN11;SDK1;CLDN4;CADM3;CDH12;F11R;CDH7		R-HSA-420582;R-HSA-373745;R-HSA-420019;R-HSA-420592;R-HSA-419981;R-HSA-420586;R-HSA-419002;R-HSA-420584;R-HSA-419001
R-HSA-1566948	Elastic fibre formation	5	46	0.00322332	0.392625	0.880731	9	17	0.00125212	9606	Homo sapiens	MFAP2;LOXL3;ITGA8;ITGA5;GDF5		R-HSA-2161282;R-HSA-2328048;R-HSA-2328037;R-HSA-2129353;R-HSA-2129385;R-HSA-2396399;R-HSA-1592387;R-HSA-2395320;R-HSA-2129375
R-HSA-8936459	RUNX1 regulates genes involved in megakaryocyte differentiation and platelet function	8	78	0.00546563	0.396606	0.880731	33	33	0.00243058	9606	Homo sapiens	HIST1H2BJ;HIST1H2AD;PRKCQ;HIST1H2BG;HIST1H3D;RUNX1		R-HSA-8936584;R-HSA-8937097;R-HSA-8937037;R-HSA-8934735;R-HSA-8938176;R-HSA-8938328;R-HSA-8937113;R-HSA-8938201;R-HSA-8937050;R-HSA-8936989;R-HSA-8937118;R-HSA-8936979;R-HSA-8934742;R-HSA-8936599;R-HSA-8938199;R-HSA-8936616;R-HSA-8936621;R-HSA-8938158;R-HSA-8936608;R-HSA-8936481;R-HSA-8938338;R-HSA-8936995;R-HSA-8938022;R-HSA-8938150;R-HSA-8937016;R-HSA-8935740;R-HSA-8937022;R-HSA-8938174;R-HSA-8…
R-HSA-2122947	NOTCH1 Intracellular Domain Regulates Transcription	6	57	0.00399411	0.400297	0.880731	3	18	0.00132577	9606	Homo sapiens	HDAC4;HEYL;HEY2;HDAC9		R-HSA-1912388;R-HSA-4396382;R-HSA-1980065
R-HSA-977225	Amyloid fiber formation	9	89	0.00623642	0.400653	0.880731	11	33	0.00243058	9606	Homo sapiens	HIST1H2BJ;TSPAN5;HIST1H2AD;HIST1H2BG;TGFBI;SNCAIP;HIST1H3D		R-HSA-976734;R-HSA-5667111;R-HSA-9010074;R-HSA-5667107;R-HSA-977224;R-HSA-9010113;R-HSA-5658574;R-HSA-5658092;R-HSA-9010034;R-HSA-977136;R-HSA-5658104
R-HSA-1912408	Pre-NOTCH Transcription and Translation	9	89	0.00623642	0.400653	0.880731	9	28	0.00206231	9606	Homo sapiens	HIST1H2BJ;NOTCH4;HIST1H2AD;HIST1H2BG;HIST1H3D;RUNX1		R-HSA-9604834;R-HSA-1912364;R-HSA-1912410;R-HSA-1912401;R-HSA-9604703;R-HSA-9604719;R-HSA-9604831;R-HSA-1912368;R-HSA-9604829
R-HSA-193807	Synthesis of bile acids and bile salts via 27-hydroxycholesterol	4	36	0.0025226	0.401171	0.880731	4	12	0.000883848	9606	Homo sapiens	AKR1C1;CYP7B1;PPIL3		R-HSA-193841;R-HSA-191972;R-HSA-193816;R-HSA-193800
R-HSA-9013695	NOTCH4 Intracellular Domain Regulates Transcription	3	26	0.00182188	0.4101	0.880731	9	9	0.000662886	9606	Homo sapiens	NOTCH4;HEY2		R-HSA-9604451;R-HSA-9604550;R-HSA-9013693;R-HSA-9605414;R-HSA-9604471;R-HSA-9013711;R-HSA-9604664;R-HSA-9604553;R-HSA-9604446
R-HSA-389357	CD28 dependent PI3K/Akt signaling	3	26	0.00182188	0.4101	0.880731	6	9	0.000662886	9606	Homo sapiens	FYN;TRIB1;PDK1		R-HSA-2317314;R-HSA-389158;R-HSA-198640;R-HSA-388832;R-HSA-198270;R-HSA-2316429
R-HSA-5173105	O-linked glycosylation	13	133	0.0093196	0.410534	0.880731	7	28	0.00206231	9606	Homo sapiens	ADAMTS4;GALNT6;ADAMTS15;ST6GAL1;WBSCR17;GALNT4;B3GNT7;ADAMTSL4;ADAMTS18;GCNT4;ADAMTS9;THSD1		R-HSA-977071;R-HSA-914012;R-HSA-977228;R-HSA-5173005;R-HSA-5173192;R-HSA-913675;R-HSA-914010
R-HSA-5083630	Defective LFNG causes SCDO3	1	6	0.000420433	0.415013	0.880731	1	1	7.3654e-05	9606	Homo sapiens	NOTCH4		R-HSA-5096538
R-HSA-8866911	TFAP2 (AP-2) family regulates transcription of cell cycle factors	1	6	0.000420433	0.415013	0.880731	2	4	0.000294616	9606	Homo sapiens	TFAP2A		R-HSA-8865244;R-HSA-8865256
R-HSA-8941333	RUNX2 regulates genes involved in differentiation of myeloid cells	1	6	0.000420433	0.415013	0.880731	1	2	0.000147308	9606	Homo sapiens	RUNX1		R-HSA-8938382
R-HSA-1296025	ATP sensitive Potassium channels	1	6	0.000420433	0.415013	0.880731	1	2	0.000147308	9606	Homo sapiens	ABCC9		R-HSA-1369017
R-HSA-5626978	TNFR1-mediated ceramide production	1	6	0.000420433	0.415013	0.880731	1	3	0.000220962	9606	Homo sapiens	SMPD3		R-HSA-5626981
R-HSA-112303	Electric Transmission Across Gap Junctions	1	6	0.000420433	0.415013	0.880731	1	4	0.000294616	9606	Homo sapiens	PANX2		R-HSA-375339
R-HSA-112307	Transmission across Electrical Synapses	1	6	0.000420433	0.415013	0.880731	1	4	0.000294616	9606	Homo sapiens	PANX2		R-HSA-375339
R-HSA-3656237	Defective EXT2 causes exostoses 2	2	16	0.00112115	0.418381	0.880731	4	4	0.000294616	9606	Homo sapiens	SDC2;GPC4		R-HSA-9036289;R-HSA-3656254;R-HSA-9036290;R-HSA-3656267
R-HSA-3656253	Defective EXT1 causes exostoses 1, TRPS2 and CHDS	2	16	0.00112115	0.418381	0.880731	4	4	0.000294616	9606	Homo sapiens	SDC2;GPC4		R-HSA-9036283;R-HSA-3656261;R-HSA-9036285;R-HSA-3656257
R-HSA-8951936	RUNX3 regulates p14-ARF	2	16	0.00112115	0.418381	0.880731	4	8	0.000589232	9606	Homo sapiens	HDAC4;RUNX1		R-HSA-8952062;R-HSA-8952081;R-HSA-8952101;R-HSA-8952069
R-HSA-2691230	Signaling by NOTCH1 HD Domain Mutants in Cancer	2	16	0.00112115	0.418381	0.880731	3	6	0.000441924	9606	Homo sapiens	NEURL1B;DLL1		R-HSA-2737728;R-HSA-2730752;R-HSA-2691219
R-HSA-2691232	Constitutive Signaling by NOTCH1 HD Domain Mutants	2	16	0.00112115	0.418381	0.880731	3	6	0.000441924	9606	Homo sapiens	NEURL1B;DLL1		R-HSA-2737728;R-HSA-2730752;R-HSA-2691219
R-HSA-8984722	Interleukin-35 Signalling	2	16	0.00112115	0.418381	0.880731	5	26	0.001915	9606	Homo sapiens	STAT3;IL27RA		R-HSA-8984012;R-HSA-8984014;R-HSA-8984001;R-HSA-8984021;R-HSA-8984023
R-HSA-1679131	Trafficking and processing of endosomal TLR	2	16	0.00112115	0.418381	0.880731	1	7	0.000515578	9606	Homo sapiens	CTSO;CTSB		R-HSA-1678920
R-HSA-186763	Downstream signal transduction	4	37	0.00259267	0.420998	0.880731	15	16	0.00117846	9606	Homo sapiens	GRB7;STAT3;PDGFA		R-HSA-382052;R-HSA-186819;R-HSA-1524182;R-HSA-382055;R-HSA-186826;R-HSA-380780;R-HSA-380782;R-HSA-382056;R-HSA-1524186;R-HSA-382058;R-HSA-186765;R-HSA-186834;R-HSA-186800;R-HSA-186778;R-HSA-186780
R-HSA-427389	ERCC6 (CSB) and EHMT2 (G9a) positively regulate rRNA expression	5	48	0.00336346	0.427416	0.880731	2	4	0.000294616	9606	Homo sapiens	HIST1H2BJ;HIST1H2AD;HIST1H2BG;HIST1H3D		R-HSA-427383;R-HSA-427336
R-HSA-2682334	EPH-Ephrin signaling	10	102	0.00714736	0.427515	0.880731	51	56	0.00412462	9606	Homo sapiens	LYN;EFNA2;EPHA10;SDC2;CLTCL1;FYN;MYH11;DNM1;EPHB3;EPHA2		R-HSA-3928633;R-HSA-3928632;R-HSA-3928639;R-HSA-3928627;R-HSA-3928625;R-HSA-3928624;R-HSA-3928631;R-HSA-3928628;R-HSA-3928617;R-HSA-3928616;R-HSA-3928623;R-HSA-3928610;R-HSA-3928615;R-HSA-3928614;R-HSA-3928612;R-HSA-4093342;R-HSA-3928602;R-HSA-3928601;R-HSA-3928600;R-HSA-3928607;R-HSA-4093339;R-HSA-4093336;R-HSA-3928604;R-HSA-3928595;R-HSA-3928594;R-HSA-4093332;R-HSA-3928592;R-HSA-4093330;R-HSA-4…
R-HSA-9705462	Inactivation of CSF3 (G-CSF) signaling	3	27	0.00189195	0.433586	0.880731	9	9	0.000662886	9606	Homo sapiens	LYN;HCK;STAT3		R-HSA-9705461;R-HSA-9705729;R-HSA-9705458;R-HSA-9705726;R-HSA-9707977;R-HSA-9705465;R-HSA-9705738;R-HSA-9705466;R-HSA-9705467
R-HSA-9617324	Negative regulation of NMDA receptor-mediated neuronal transmission	3	27	0.00189195	0.433586	0.880731	2	4	0.000294616	9606	Homo sapiens	CAMK2B;GRIN2A;NEFL		R-HSA-9619449;R-HSA-9617326
R-HSA-2022377	Metabolism of Angiotensinogen to Angiotensins	3	27	0.00189195	0.433586	0.880731	4	20	0.00147308	9606	Homo sapiens	CPA3;MME;CTSZ		R-HSA-2022396;R-HSA-2022381;R-HSA-2028294;R-HSA-2022368
R-HSA-5625886	Activated PKN1 stimulates transcription of AR (androgen receptor) regulated genes KLK2 and KLK3	5	49	0.00343354	0.444672	0.880731	8	11	0.000810194	9606	Homo sapiens	HIST1H2BJ;HIST1H2AD;HIST1H2BG;HIST1H3D		R-HSA-5625797;R-HSA-5625796;R-HSA-5625870;R-HSA-5625774;R-HSA-5625849;R-HSA-5625848;R-HSA-5625784;R-HSA-5625883
R-HSA-8877330	RUNX1 and FOXP3 control the development of regulatory T lymphocytes (Tregs)	2	17	0.00119123	0.448555	0.880731	20	20	0.00147308	9606	Homo sapiens	NFATC2;RUNX1		R-HSA-8877414;R-HSA-8939082;R-HSA-8877348;R-HSA-8877345;R-HSA-8877391;R-HSA-8877485;R-HSA-8877421;R-HSA-8865547;R-HSA-8865546;R-HSA-8877385;R-HSA-8877192;R-HSA-8877493;R-HSA-8877396;R-HSA-8877490;R-HSA-8877360;R-HSA-8939088;R-HSA-8877404;R-HSA-8877338;R-HSA-8877369;R-HSA-9006422
R-HSA-170660	Adenylate cyclase activating pathway	2	17	0.00119123	0.448555	0.880731	4	4	0.000294616	9606	Homo sapiens	GNAL;ADCY2		R-HSA-170672;R-HSA-170676;R-HSA-170677;R-HSA-170685
R-HSA-2559584	Formation of Senescence-Associated Heterochromatin Foci (SAHF)	2	17	0.00119123	0.448555	0.880731	1	2	0.000147308	9606	Homo sapiens	HIST1H1C		R-HSA-4647594
R-HSA-350054	Notch-HLH transcription pathway	3	28	0.00196202	0.456718	0.880731	2	2	0.000147308	9606	Homo sapiens	HDAC4;NOTCH4;HDAC9		R-HSA-212356;R-HSA-350058
R-HSA-9670439	Signaling by phosphorylated juxtamembrane, extracellular and kinase domain KIT mutants	3	28	0.00196202	0.456718	0.880731	7	11	0.000810194	9606	Homo sapiens	LYN;STAT3;FYN		R-HSA-9670418;R-HSA-9670417;R-HSA-9670416;R-HSA-9670426;R-HSA-9670414;R-HSA-9670413;R-HSA-9670412
R-HSA-9669938	Signaling by KIT in disease	3	28	0.00196202	0.456718	0.880731	7	25	0.00184135	9606	Homo sapiens	LYN;STAT3;FYN		R-HSA-9670418;R-HSA-9670417;R-HSA-9670416;R-HSA-9670426;R-HSA-9670414;R-HSA-9670413;R-HSA-9670412
R-HSA-112409	RAF-independent MAPK1/3 activation	3	28	0.00196202	0.456718	0.880731	2	12	0.000883848	9606	Homo sapiens	DUSP4;DUSP5;DUSP9		R-HSA-5675376;R-HSA-5675373
R-HSA-389356	CD28 co-stimulation	4	39	0.00273281	0.460127	0.880731	13	19	0.00139943	9606	Homo sapiens	LYN;FYN;TRIB1;PDK1		R-HSA-389381;R-HSA-2317314;R-HSA-389348;R-HSA-389158;R-HSA-389350;R-HSA-388832;R-HSA-388814;R-HSA-389352;R-HSA-2316429;R-HSA-389354;R-HSA-198640;R-HSA-388831;R-HSA-198270
R-HSA-110330	Recognition and association of DNA glycosylase with site containing an affected purine	4	39	0.00273281	0.460127	0.880731	2	10	0.00073654	9606	Homo sapiens	HIST1H2BJ;HIST1H2AD;HIST1H2BG		R-HSA-9629195;R-HSA-9629373
R-HSA-446728	Cell junction organization	9	94	0.00658678	0.463032	0.880731	13	37	0.0027252	9606	Homo sapiens	CLDN11;SDK1;CLDN4;CADM3;LAMB3;LAMC3;CDH12;F11R;CDH7		R-HSA-420582;R-HSA-446083;R-HSA-419981;R-HSA-420586;R-HSA-420584;R-HSA-446089;R-HSA-373745;R-HSA-420019;R-HSA-420592;R-HSA-432956;R-HSA-446077;R-HSA-419002;R-HSA-419001
R-HSA-399710	Activation of AMPA receptors	1	7	0.000490505	0.465032	0.880731	5	5	0.00036827	9606	Homo sapiens	GRIA4		R-HSA-420980;R-HSA-399712;R-HSA-420977;R-HSA-399711;R-HSA-420975
R-HSA-8939247	RUNX1 regulates transcription of genes involved in interleukin signaling	1	7	0.000490505	0.465032	0.880731	5	5	0.00036827	9606	Homo sapiens	RUNX1		R-HSA-8938938;R-HSA-8934688;R-HSA-8938913;R-HSA-8934690;R-HSA-8938981
R-HSA-174577	Activation of C3 and C5	1	7	0.000490505	0.465032	0.880731	3	3	0.000220962	9606	Homo sapiens	C2		R-HSA-173680;R-HSA-166817;R-HSA-173636
R-HSA-203754	NOSIP mediated eNOS trafficking	1	7	0.000490505	0.465032	0.880731	2	2	0.000147308	9606	Homo sapiens	NOS3		R-HSA-203553;R-HSA-203680
R-HSA-8849474	PTK6 Activates STAT3	1	7	0.000490505	0.465032	0.880731	6	9	0.000662886	9606	Homo sapiens	STAT3		R-HSA-8848087;R-HSA-8848150;R-HSA-8848178;R-HSA-2730595;R-HSA-8848124;R-HSA-2730599
R-HSA-1566977	Fibronectin matrix formation	1	7	0.000490505	0.465032	0.880731	2	3	0.000220962	9606	Homo sapiens	ITGA5		R-HSA-202723;R-HSA-2327746
R-HSA-420597	Nectin/Necl trans heterodimerization	1	7	0.000490505	0.465032	0.880731	3	8	0.000589232	9606	Homo sapiens	CADM3		R-HSA-420582;R-HSA-420586;R-HSA-420584
R-HSA-74713	IRS activation	1	7	0.000490505	0.465032	0.880731	1	3	0.000220962	9606	Homo sapiens	GRB10		R-HSA-74707
R-HSA-8941284	RUNX2 regulates chondrocyte maturation	1	7	0.000490505	0.465032	0.880731	1	4	0.000294616	9606	Homo sapiens	HDAC4		R-HSA-9008326
R-HSA-5250971	Toxicity of botulinum toxin type C (botC)	1	7	0.000490505	0.465032	0.880731	1	5	0.00036827	9606	Homo sapiens	SNAP25		R-HSA-194793
R-HSA-1606341	IRF3 mediated activation of type 1 IFN	1	7	0.000490505	0.465032	0.880731	1	6	0.000441924	9606	Homo sapiens	NLRP4		R-HSA-1606327
R-HSA-1793185	Chondroitin sulfate/dermatan sulfate metabolism	7	73	0.00511527	0.477143	0.880731	21	28	0.00206231	9606	Homo sapiens	CSGALNACT1;CHST9;SDC2;BGN;CSPG4;GPC4;CHST3		R-HSA-1889981;R-HSA-2022911;R-HSA-1971487;R-HSA-9638064;R-HSA-1793176;R-HSA-1971482;R-HSA-2018682;R-HSA-1971483;R-HSA-1889978;R-HSA-1878002;R-HSA-2065233;R-HSA-2022065;R-HSA-9632034;R-HSA-2022063;R-HSA-2022061;R-HSA-9632033;R-HSA-2022056;R-HSA-2022052;R-HSA-2018659;R-HSA-1971491;R-HSA-1889955
R-HSA-8847993	ERBB2 Activates PTK6 Signaling	2	18	0.0012613	0.477823	0.880731	2	2	0.000147308	9606	Homo sapiens	ERBB3;NRG4		R-HSA-8848005;R-HSA-8847995
R-HSA-1433559	Regulation of KIT signaling	2	18	0.0012613	0.477823	0.880731	3	8	0.000589232	9606	Homo sapiens	LYN;FYN		R-HSA-205319;R-HSA-1433506;R-HSA-205244
R-HSA-1483115	Hydrolysis of LPC	2	18	0.0012613	0.477823	0.880731	2	6	0.000441924	9606	Homo sapiens	JMJD7-PLA2G4B;PLA2G4A		R-HSA-1482612;R-HSA-1482685
R-HSA-5607763	CLEC7A (Dectin-1) induces NFAT activation	2	18	0.0012613	0.477823	0.880731	2	6	0.000441924	9606	Homo sapiens	NFATC2;NFATC1		R-HSA-2730849;R-HSA-2730867
R-HSA-177504	Retrograde neurotrophin signalling	2	18	0.0012613	0.477823	0.880731	1	3	0.000220962	9606	Homo sapiens	DNM3;DNM1		R-HSA-177501
R-HSA-1433557	Signaling by SCF-KIT	5	51	0.00357368	0.478763	0.880731	20	39	0.0028725	9606	Homo sapiens	LYN;GRB7;STAT3;GRB10;FYN		R-HSA-1433428;R-HSA-205319;R-HSA-1433456;R-HSA-1433488;R-HSA-1562641;R-HSA-1433501;R-HSA-1470012;R-HSA-1470010;R-HSA-1470009;R-HSA-1472121;R-HSA-205234;R-HSA-1433542;R-HSA-205238;R-HSA-205205;R-HSA-1433506;R-HSA-1433454;R-HSA-1433451;R-HSA-1433418;R-HSA-1433514;R-HSA-205244
R-HSA-3000170	Syndecan interactions	3	29	0.00203209	0.479439	0.880731	6	15	0.00110481	9606	Homo sapiens	COL3A1;COL5A1;SDC2		R-HSA-2684507;R-HSA-2750177;R-HSA-2731075;R-HSA-2731122;R-HSA-2750181;R-HSA-2731078
R-HSA-164952	The role of Nef in HIV-1 replication and disease pathogenesis	3	29	0.00203209	0.479439	0.880731	5	20	0.00147308	9606	Homo sapiens	HCK;FYN;AP1S3		R-HSA-182263;R-HSA-182279;R-HSA-200858;R-HSA-182286;R-HSA-200908
R-HSA-9634638	Estrogen-dependent nuclear events downstream of ESR-membrane signaling	3	29	0.00203209	0.479439	0.880731	3	12	0.000883848	9606	Homo sapiens	FOS;EMB		R-HSA-9625479;R-HSA-9632873;R-HSA-9625465
R-HSA-418597	G alpha (z) signalling events	6	63	0.00441455	0.493212	0.880731	13	13	0.000957502	9606	Homo sapiens	GNAZ;GNAT3;GNG4;RGS16;PRKCQ;ADCY2		R-HSA-392133;R-HSA-392129;R-HSA-392064;R-HSA-8982703;R-HSA-749453;R-HSA-750988;R-HSA-751040;R-HSA-8982018;R-HSA-8982021;R-HSA-749446;R-HSA-8981892;R-HSA-751024;R-HSA-8982709
R-HSA-9710421	Defective pyroptosis	5	52	0.00364375	0.495546	0.880731	1	3	0.000220962	9606	Homo sapiens	HIST1H2BJ;HIST1H2AD;HIST1H2BG;HIST1H3D		R-HSA-9710490
R-HSA-1989781	PPARA activates gene expression	16	175	0.0122626	0.497054	0.880731	10	41	0.00301981	9606	Homo sapiens	GLIPR1;HMGCS1;MED30;ABCB4;CD36;TRIB1;NPAS2;MED29;SULT2A1		R-HSA-560473;R-HSA-879724;R-HSA-1655848;R-HSA-1989775;R-HSA-1989772;R-HSA-1368065;R-HSA-1989767;R-HSA-1989762;R-HSA-560517;R-HSA-1989760
R-HSA-420029	Tight junction interactions	3	30	0.00210217	0.501704	0.880731	2	3	0.000220962	9606	Homo sapiens	CLDN11;CLDN4;F11R		R-HSA-420019;R-HSA-419981
R-HSA-8963889	Assembly of active LPL and LIPC lipase complexes	3	30	0.00210217	0.501704	0.880731	5	12	0.000883848	9606	Homo sapiens	LPL;PCSK6;MBTPS2		R-HSA-6784628;R-HSA-6784676;R-HSA-6784861;R-HSA-6784620;R-HSA-8857928
R-HSA-3295583	TRP channels	3	30	0.00210217	0.501704	0.880731	1	4	0.000294616	9606	Homo sapiens	TRPV2;TRPV3;MCOLN2		R-HSA-3295579
R-HSA-6785631	ERBB2 Regulates Cell Motility	2	19	0.00133137	0.506122	0.880731	2	2	0.000147308	9606	Homo sapiens	ERBB3;NRG4		R-HSA-6785636;R-HSA-6785648
R-HSA-3270619	IRF3-mediated induction of type I IFN	2	19	0.00133137	0.506122	0.880731	2	5	0.00036827	9606	Homo sapiens	NLRP4;NLRC3		R-HSA-1834939;R-HSA-2396007
R-HSA-416700	Other semaphorin interactions	2	19	0.00133137	0.506122	0.880731	2	9	0.000662886	9606	Homo sapiens	SEMA6A;PLXNB3		R-HSA-416723;R-HSA-416698
R-HSA-8957275	Post-translational protein phosphorylation	10	109	0.00763787	0.509291	0.880731	1	1	7.3654e-05	9606	Homo sapiens	CSF1;EVA1A;SDC2;ALB;FGG;SPP1;SPARCL1;CABP1;AFP;APOL1		R-HSA-8952289
R-HSA-8935964	RUNX1 regulates expression of components of tight junctions	1	8	0.000560577	0.510777	0.880731	6	6	0.000441924	9606	Homo sapiens	RUNX1		R-HSA-8935960;R-HSA-8935980;R-HSA-8936000;R-HSA-8935988;R-HSA-8935972;R-HSA-8936007
R-HSA-111957	Cam-PDE 1 activation	1	8	0.000560577	0.510777	0.880731	2	2	0.000147308	9606	Homo sapiens	PDE1B		R-HSA-111955;R-HSA-111956
R-HSA-165160	PDE3B signalling	1	8	0.000560577	0.510777	0.880731	2	2	0.000147308	9606	Homo sapiens	PDE3B		R-HSA-162363;R-HSA-162425
R-HSA-109703	PKB-mediated events	1	8	0.000560577	0.510777	0.880731	2	2	0.000147308	9606	Homo sapiens	PDE3B		R-HSA-162363;R-HSA-162425
R-HSA-5576894	Phase 1 - inactivation of fast Na+ channels	1	8	0.000560577	0.510777	0.880731	1	1	7.3654e-05	9606	Homo sapiens	KCND2		R-HSA-5577234
R-HSA-5340588	Signaling by RNF43 mutants	1	8	0.000560577	0.510777	0.880731	1	1	7.3654e-05	9606	Homo sapiens	LRP5		R-HSA-5340587
R-HSA-4341670	Defective NEU1 causes sialidosis	1	8	0.000560577	0.510777	0.880731	1	1	7.3654e-05	9606	Homo sapiens	GAL		R-HSA-4341669
R-HSA-9652817	Signaling by MAPK mutants	1	8	0.000560577	0.510777	0.880731	1	1	7.3654e-05	9606	Homo sapiens	DUSP9		R-HSA-9652816
R-HSA-9730628	Sensory perception of salty taste	1	8	0.000560577	0.510777	0.880731	1	2	0.000147308	9606	Homo sapiens	SCNN1A		R-HSA-2672334
R-HSA-75094	Formation of the Editosome	1	8	0.000560577	0.510777	0.880731	1	2	0.000147308	9606	Homo sapiens	APOBEC3B		R-HSA-77609
R-HSA-5362798	Release of Hh-Np from the secreting cell	1	8	0.000560577	0.510777	0.880731	2	5	0.00036827	9606	Homo sapiens	DISP2		R-HSA-5362551;R-HSA-5362422
R-HSA-2660826	Constitutive Signaling by NOTCH1 t(7;9)(NOTCH1:M1580_K2555) Translocation Mutant	1	8	0.000560577	0.510777	0.880731	1	5	0.00036827	9606	Homo sapiens	DLL1		R-HSA-2660819
R-HSA-2660825	Signaling by NOTCH1 t(7;9)(NOTCH1:M1580_K2555) Translocation Mutant	1	8	0.000560577	0.510777	0.880731	1	5	0.00036827	9606	Homo sapiens	DLL1		R-HSA-2660819
R-HSA-400206	Regulation of lipid metabolism by PPARalpha	16	177	0.0124028	0.515162	0.880731	10	44	0.00324077	9606	Homo sapiens	GLIPR1;HMGCS1;MED30;ABCB4;CD36;TRIB1;NPAS2;MED29;SULT2A1		R-HSA-560473;R-HSA-879724;R-HSA-1655848;R-HSA-1989775;R-HSA-1989772;R-HSA-1368065;R-HSA-1989767;R-HSA-1989762;R-HSA-560517;R-HSA-1989760
R-HSA-110328	Recognition and association of DNA glycosylase with site containing an affected pyrimidine	4	42	0.00294303	0.51695	0.880731	1	21	0.00154673	9606	Homo sapiens	HIST1H2BJ;HIST1H2AD;HIST1H2BG		R-HSA-9629372
R-HSA-1483166	Synthesis of PA	6	65	0.00455469	0.523187	0.880731	4	17	0.00125212	9606	Homo sapiens	44623;PLA2G12A;JMJD7-PLA2G4B;PLA2G4A;GPD1L;44624		R-HSA-75889;R-HSA-1482656;R-HSA-1602446;R-HSA-1482604
R-HSA-9620244	Long-term potentiation	3	31	0.00217224	0.52347	0.880731	5	7	0.000515578	9606	Homo sapiens	CAMK2B;GRIN2A;NEFL		R-HSA-445367;R-HSA-442725;R-HSA-9612085;R-HSA-9618750;R-HSA-9617583
R-HSA-3000157	Laminin interactions	3	31	0.00217224	0.52347	0.880731	10	15	0.00110481	9606	Homo sapiens	LAMB3;LAMC3		R-HSA-2426676;R-HSA-216048;R-HSA-3787997;R-HSA-2426450;R-HSA-2396083;R-HSA-2426530;R-HSA-4084505;R-HSA-3907292;R-HSA-2327803;R-HSA-349626
R-HSA-1500931	Cell-Cell communication	12	133	0.0093196	0.525377	0.880731	22	60	0.00441924	9606	Homo sapiens	KIRREL3;CLDN11;SDK1;CADM3;CLDN4;LAMB3;LAMC3;CDH12;FYN;F11R;FYB;CDH7		R-HSA-420582;R-HSA-373734;R-HSA-446083;R-HSA-451758;R-HSA-391151;R-HSA-419981;R-HSA-451757;R-HSA-420586;R-HSA-420584;R-HSA-446089;R-HSA-532603;R-HSA-373745;R-HSA-420019;R-HSA-420592;R-HSA-373747;R-HSA-8981534;R-HSA-373724;R-HSA-432956;R-HSA-373727;R-HSA-446077;R-HSA-419002;R-HSA-419001
R-HSA-1638091	Heparan sulfate/heparin (HS-GAG) metabolism	8	88	0.00616635	0.528008	0.880731	22	33	0.00243058	9606	Homo sapiens	HS3ST3B1;GAL;SDC2;BGN;CSPG4;GPC4;HS3ST1		R-HSA-2076383;R-HSA-2090079;R-HSA-1889981;R-HSA-9638064;R-HSA-2076508;R-HSA-1667005;R-HSA-1889978;R-HSA-2024084;R-HSA-2076371;R-HSA-1878002;R-HSA-2024108;R-HSA-2022860;R-HSA-2022856;R-HSA-2076392;R-HSA-2022887;R-HSA-2022919;R-HSA-2024100;R-HSA-2076419;R-HSA-2076611;R-HSA-2022851;R-HSA-1678694;R-HSA-1889955
R-HSA-3232118	SUMOylation of transcription factors	2	20	0.00140144	0.533401	0.880731	2	11	0.000810194	9606	Homo sapiens	TFAP2A;MITF		R-HSA-3234081;R-HSA-3232162
R-HSA-6803207	TP53 Regulates Transcription of Caspase Activators and Caspases	2	20	0.00140144	0.533401	0.880731	2	17	0.00125212	9606	Homo sapiens	CASP1		R-HSA-6798082;R-HSA-6798081
R-HSA-2299718	Condensation of Prophase Chromosomes	5	55	0.00385397	0.54457	0.880731	8	10	0.00073654	9606	Homo sapiens	HIST1H2BJ;HIST1H2AD;HIST1H2BG;HIST1H3D		R-HSA-2245218;R-HSA-2288097;R-HSA-2301205;R-HSA-2294580;R-HSA-2172678;R-HSA-2294600;R-HSA-2294574;R-HSA-2294590
R-HSA-3560782	Diseases associated with glycosaminoglycan metabolism	5	55	0.00385397	0.54457	0.880731	15	29	0.00213597	9606	Homo sapiens	SDC2;BGN;CSPG4;GPC4;CHST3		R-HSA-3636919;R-HSA-9036289;R-HSA-3656254;R-HSA-9036290;R-HSA-4420365;R-HSA-3595175;R-HSA-3560804;R-HSA-9036283;R-HSA-3656261;R-HSA-3560802;R-HSA-9036285;R-HSA-3656257;R-HSA-3656267;R-HSA-3595178;R-HSA-3595176
R-HSA-8934593	Regulation of RUNX1 Expression and Activity	3	32	0.00224231	0.544703	0.880731	19	19	0.00139943	9606	Homo sapiens	H19;RUNX1		R-HSA-8938440;R-HSA-8935785;R-HSA-8938507;R-HSA-8937134;R-HSA-8937728;R-HSA-8936068;R-HSA-8938853;R-HSA-8937767;R-HSA-8938887;R-HSA-8865320;R-HSA-8935864;R-HSA-8939129;R-HSA-8935930;R-HSA-8936058;R-HSA-8937744;R-HSA-8937682;R-HSA-8938867;R-HSA-8935766;R-HSA-8938487
R-HSA-2122948	Activated NOTCH1 Transmits Signal to the Nucleus	3	32	0.00224231	0.544703	0.880731	5	21	0.00154673	9606	Homo sapiens	NEURL1B;DLL1;DLK1		R-HSA-157632;R-HSA-1980074;R-HSA-1980138;R-HSA-1980039;R-HSA-1980130
R-HSA-3906995	Diseases associated with O-glycosylation of proteins	7	78	0.00546563	0.546009	0.880731	2	9	0.000662886	9606	Homo sapiens	ADAMTS4;ADAMTS15;ADAMTSL4;NOTCH4;ADAMTS18;ADAMTS9;THSD1		R-HSA-5096538;R-HSA-6785565
R-HSA-201722	Formation of the beta-catenin:TCF transactivating complex	6	67	0.00469484	0.552429	0.880731	13	13	0.000957502	9606	Homo sapiens	HIST1H2BJ;LEF1;HIST1H2AD;HIST1H2BG;HIST1H3D		R-HSA-3299569;R-HSA-4411367;R-HSA-3322422;R-HSA-3451153;R-HSA-3364026;R-HSA-3322427;R-HSA-3322424;R-HSA-4411372;R-HSA-201712;R-HSA-4411351;R-HSA-3364014;R-HSA-4411357;R-HSA-3451147
R-HSA-8869496	TFAP2A acts as a transcriptional repressor during retinoic acid induced cell differentiation	1	9	0.00063065	0.552613	0.880731	7	7	0.000515578	9606	Homo sapiens	TFAP2A		R-HSA-8869543;R-HSA-8869558;R-HSA-8869542;R-HSA-8869568;R-HSA-8869566;R-HSA-8869549;R-HSA-8869560
R-HSA-8939256	RUNX1 regulates transcription of genes involved in WNT signaling	1	9	0.00063065	0.552613	0.880731	4	4	0.000294616	9606	Homo sapiens	RUNX1		R-HSA-8877879;R-HSA-8932076;R-HSA-8877884;R-HSA-8932084
R-HSA-9027283	Erythropoietin activates STAT5	1	9	0.00063065	0.552613	0.880731	3	3	0.000220962	9606	Homo sapiens	LYN		R-HSA-9012651;R-HSA-9012650;R-HSA-9012654
R-HSA-111995	phospho-PLA2 pathway	1	9	0.00063065	0.552613	0.880731	3	3	0.000220962	9606	Homo sapiens	PLA2G4A		R-HSA-111881;R-HSA-111883;R-HSA-111898
R-HSA-140180	COX reactions	1	9	0.00063065	0.552613	0.880731	2	2	0.000147308	9606	Homo sapiens	PTGS1		R-HSA-140355;R-HSA-140359
R-HSA-113507	E2F-enabled inhibition of pre-replication complex formation	1	9	0.00063065	0.552613	0.880731	1	1	7.3654e-05	9606	Homo sapiens	ORC2		R-HSA-113638
R-HSA-6802953	RAS signaling downstream of NF1 loss-of-function variants	1	9	0.00063065	0.552613	0.880731	1	1	7.3654e-05	9606	Homo sapiens	SPRED2		R-HSA-6802837
R-HSA-5250981	Toxicity of botulinum toxin type F (botF)	1	9	0.00063065	0.552613	0.880731	3	5	0.00036827	9606	Homo sapiens	SV2A		R-HSA-5250880;R-HSA-5250884;R-HSA-5250875
R-HSA-5250955	Toxicity of botulinum toxin type D (botD)	1	9	0.00063065	0.552613	0.880731	3	5	0.00036827	9606	Homo sapiens	SV2A		R-HSA-5250600;R-HSA-5250616;R-HSA-5250607
R-HSA-8964011	HDL clearance	1	9	0.00063065	0.552613	0.880731	2	5	0.00036827	9606	Homo sapiens	SCARB1		R-HSA-349637;R-HSA-349638
R-HSA-2161517	Abacavir transmembrane transport	1	9	0.00063065	0.552613	0.880731	1	3	0.000220962	9606	Homo sapiens	ABCB4		R-HSA-2161538
R-HSA-3000178	ECM proteoglycans	7	79	0.0055357	0.559332	0.880731	8	23	0.00169404	9606	Homo sapiens	COL3A1;COL2A1;COL5A1;SERPINE1;BGN;ITGA8;COL9A3		R-HSA-2396370;R-HSA-2327909;R-HSA-2424252;R-HSA-2466238;R-HSA-2681667;R-HSA-2396079;R-HSA-2327886;R-HSA-2466106
R-HSA-3000471	Scavenging by Class B Receptors	2	21	0.00147152	0.55963	0.880731	4	5	0.00036827	9606	Homo sapiens	SCARB1;CD36		R-HSA-2187264;R-HSA-2512800;R-HSA-2247512;R-HSA-2197646
R-HSA-9031628	NGF-stimulated transcription	5	56	0.00392404	0.560406	0.880731	24	37	0.0027252	9606	Homo sapiens	EGR1;FOS;TRIB1;ZNF225		R-HSA-9613202;R-HSA-9621042;R-HSA-9031624;R-HSA-9620723;R-HSA-9613207;R-HSA-9620663;R-HSA-9613210;R-HSA-9031616;R-HSA-9621048;R-HSA-9612514;R-HSA-9612483;R-HSA-9613219;R-HSA-9612516;R-HSA-9621386;R-HSA-9621035;R-HSA-9621032;R-HSA-9621385;R-HSA-9612073;R-HSA-9616105;R-HSA-9616110;R-HSA-9616367;R-HSA-9031575;R-HSA-9612076;R-HSA-9612493
R-HSA-8963899	Plasma lipoprotein remodeling	5	56	0.00392404	0.560406	0.880731	8	31	0.00228327	9606	Homo sapiens	LIPG;ALB;LPL;PCSK6;MBTPS2		R-HSA-6784628;R-HSA-264679;R-HSA-6784676;R-HSA-174757;R-HSA-6784861;R-HSA-6784620;R-HSA-8980228;R-HSA-8857928
R-HSA-445095	Interaction between L1 and Ankyrins	3	33	0.00231238	0.565375	0.880731	1	4	0.000294616	9606	Homo sapiens	NFASC;NRCAM;SCN1B		R-HSA-373739
R-HSA-2559582	Senescence-Associated Secretory Phenotype (SASP)	8	91	0.00637657	0.565547	0.880731	13	22	0.00162039	9606	Homo sapiens	HIST1H2BJ;STAT3;UBE2E1;HIST1H2AD;HIST1H2BG;FOS;HIST1H3D		R-HSA-3790137;R-HSA-4568740;R-HSA-4568737;R-HSA-3858387;R-HSA-3790130;R-HSA-3797202;R-HSA-3788725;R-HSA-3788724;R-HSA-3788745;R-HSA-3788748;R-HSA-3797196;R-HSA-3788705;R-HSA-3788708
R-HSA-1912422	Pre-NOTCH Expression and Processing	10	114	0.00798823	0.565573	0.880731	19	38	0.00279885	9606	Homo sapiens	POGLUT1;HIST1H2BJ;NOTCH4;HIST1H2AD;HIST1H2BG;HIST1H3D;RUNX1		R-HSA-1912349;R-HSA-1912382;R-HSA-1912379;R-HSA-1912378;R-HSA-1912410;R-HSA-1912372;R-HSA-1912374;R-HSA-1912369;R-HSA-1912401;R-HSA-9604703;R-HSA-9604831;R-HSA-1912368;R-HSA-9604829;R-HSA-9604834;R-HSA-1912364;R-HSA-1912353;R-HSA-9604719;R-HSA-1912352;R-HSA-1912355
R-HSA-110331	Cleavage of the damaged purine	4	45	0.00315325	0.570817	0.880731	2	9	0.000662886	9606	Homo sapiens	HIST1H2BJ;HIST1H2AD;HIST1H2BG		R-HSA-9629216;R-HSA-9629483
R-HSA-5625740	RHO GTPases activate PKNs	7	80	0.00560577	0.572477	0.880731	11	20	0.00147308	9606	Homo sapiens	HIST1H2BJ;HIST1H2AD;MYH11;HIST1H2BG;HIST1H3D;PDK1		R-HSA-5625797;R-HSA-5625796;R-HSA-5623632;R-HSA-5623667;R-HSA-419232;R-HSA-5625870;R-HSA-5625774;R-HSA-5625849;R-HSA-5625848;R-HSA-5625784;R-HSA-5625883
R-HSA-1963642	PI3K events in ERBB2 signaling	2	22	0.00154159	0.584787	0.880731	4	7	0.000515578	9606	Homo sapiens	ERBB3;NRG4		R-HSA-1306979;R-HSA-1250346;R-HSA-1250462;R-HSA-1250189
R-HSA-3229121	Glycogen storage diseases	2	22	0.00154159	0.584787	0.880731	2	10	0.00073654	9606	Homo sapiens	PPP1R3C;NHLRC1		R-HSA-3797226;R-HSA-3791349
R-HSA-75105	Fatty acyl-CoA biosynthesis	7	81	0.00567585	0.585436	0.880731	6	24	0.0017677	9606	Homo sapiens	ELOVL2;HSD17B3;ACSBG1;ELOVL6;ACSL4;PTPLA		R-HSA-5695957;R-HSA-548843;R-HSA-548814;R-HSA-548800;R-HSA-548818;R-HSA-5676637
R-HSA-73927	Depurination	4	46	0.00322332	0.588009	0.880731	4	19	0.00139943	9606	Homo sapiens	HIST1H2BJ;HIST1H2AD;HIST1H2BG		R-HSA-9629216;R-HSA-9629483;R-HSA-9629195;R-HSA-9629373
R-HSA-8951430	RUNX3 regulates WNT signaling	1	10	0.000700722	0.590875	0.880731	5	5	0.00036827	9606	Homo sapiens	LEF1		R-HSA-4411367;R-HSA-8951442;R-HSA-8951443;R-HSA-8951428;R-HSA-4411357
R-HSA-4411364	Binding of TCF/LEF:CTNNB1 to target gene promoters	1	10	0.000700722	0.590875	0.880731	4	4	0.000294616	9606	Homo sapiens	LEF1		R-HSA-4411351;R-HSA-4411367;R-HSA-4411357;R-HSA-4411372
R-HSA-8849473	PTK6 Expression	1	10	0.000700722	0.590875	0.880731	3	3	0.000220962	9606	Homo sapiens	EPAS1		R-HSA-8848804;R-HSA-8856930;R-HSA-8848812
R-HSA-111367	SLBP independent Processing of Histone Pre-mRNAs	1	10	0.000700722	0.590875	0.880731	2	2	0.000147308	9606	Homo sapiens	SNRPG;SNRPGP15		R-HSA-111437;R-HSA-111438
R-HSA-9726840	SHOC2 M1731 mutant abolishes MRAS complex function	1	10	0.000700722	0.590875	0.880731	1	1	7.3654e-05	9606	Homo sapiens	MRAS		R-HSA-9660536
R-HSA-8931987	RUNX1 regulates estrogen receptor mediated transcription	1	10	0.000700722	0.590875	0.880731	7	8	0.000589232	9606	Homo sapiens	RUNX1		R-HSA-8932076;R-HSA-8931981;R-HSA-8932033;R-HSA-8932084;R-HSA-8932020;R-HSA-8932037;R-HSA-8932021
R-HSA-72200	mRNA Editing: C to U Conversion	1	10	0.000700722	0.590875	0.880731	2	3	0.000220962	9606	Homo sapiens	APOBEC3B		R-HSA-77609;R-HSA-83677
R-HSA-5666185	RHO GTPases Activate Rhotekin and Rhophilins	1	10	0.000700722	0.590875	0.880731	2	6	0.000441924	9606	Homo sapiens	RHPN1		R-HSA-5667008;R-HSA-5667052
R-HSA-8847453	Synthesis of PIPs in the nucleus	1	10	0.000700722	0.590875	0.880731	1	3	0.000220962	9606	Homo sapiens	PIP4K2A		R-HSA-6811522
R-HSA-2892245	POU5F1 (OCT4), SOX2, NANOG repress genes related to differentiation	1	10	0.000700722	0.590875	0.880731	1	7	0.000515578	9606	Homo sapiens	GATA6		R-HSA-2972952
R-HSA-912446	Meiotic recombination	5	58	0.00406419	0.591219	0.880731	4	9	0.000662886	9606	Homo sapiens	HIST1H2BJ;HIST1H2AD;HIST1H2BG;HIST1H3D		R-HSA-912458;R-HSA-912503;R-HSA-912496;R-HSA-1214188
R-HSA-9674555	Signaling by CSF3 (G-CSF)	3	35	0.00245253	0.604944	0.880731	21	21	0.00154673	9606	Homo sapiens	LYN;HCK;STAT3		R-HSA-9705461;R-HSA-9674546;R-HSA-9677585;R-HSA-9674550;R-HSA-9705458;R-HSA-9705726;R-HSA-9674808;R-HSA-9705465;R-HSA-9674558;R-HSA-9705466;R-HSA-9705467;R-HSA-9674563;R-HSA-9674562;R-HSA-9674816;R-HSA-9676071;R-HSA-9674567;R-HSA-9705729;R-HSA-9677579;R-HSA-9707977;R-HSA-9674542;R-HSA-9705738
R-HSA-392154	Nitric oxide stimulates guanylate cyclase	3	35	0.00245253	0.604944	0.880731	4	7	0.000515578	9606	Homo sapiens	GUCY1A2;PDE1B;NOS3		R-HSA-418436;R-HSA-392143;R-HSA-392152;R-HSA-418456
R-HSA-418990	Adherens junctions interactions	3	35	0.00245253	0.604944	0.880731	6	16	0.00117846	9606	Homo sapiens	CADM3;CDH12;CDH7		R-HSA-420582;R-HSA-420592;R-HSA-420586;R-HSA-419002;R-HSA-420584;R-HSA-419001
R-HSA-210745	Regulation of gene expression in beta cells	3	35	0.00245253	0.604944	0.880731	3	12	0.000883848	9606	Homo sapiens	PAX6;NKX6-1		R-HSA-211350;R-HSA-211289;R-HSA-211272
R-HSA-8939236	RUNX1 regulates transcription of genes involved in differentiation of HSCs	9	106	0.00742765	0.605183	0.880731	11	15	0.00110481	9606	Homo sapiens	HIST1H2BJ;PSMC4;MYB;HIST1H2AD;HIST1H2BG;HIST1H3D;RUNX1		R-HSA-8956568;R-HSA-8956649;R-HSA-8956586;R-HSA-8865491;R-HSA-8956652;R-HSA-8865505;R-HSA-8956639;R-HSA-8956608;R-HSA-8957265;R-HSA-8865498;R-HSA-8865482
R-HSA-373752	Netrin-1 signaling	5	59	0.00413426	0.606171	0.880731	15	37	0.0027252	9606	Homo sapiens	UNC5B;PRKCQ;FYN;UNC5C;SLIT3		R-HSA-418850;R-HSA-374701;R-HSA-418863;R-HSA-418858;R-HSA-374664;R-HSA-418859;R-HSA-418856;R-HSA-373716;R-HSA-373751;R-HSA-418868;R-HSA-373713;R-HSA-373715;R-HSA-418865;R-HSA-622357;R-HSA-418874
R-HSA-9006927	Signaling by Non-Receptor Tyrosine Kinases	6	71	0.00497512	0.608276	0.880731	15	53	0.00390366	9606	Homo sapiens	ERBB3;NRG4;EPAS1;LRRK2;STAT3;LINC01139		R-HSA-8848005;R-HSA-8848804;R-HSA-8856930;R-HSA-8857583;R-HSA-2730595;R-HSA-8848812;R-HSA-8857577;R-HSA-2730599;R-HSA-8848087;R-HSA-8848150;R-HSA-8848178;R-HSA-8857565;R-HSA-8848124;R-HSA-8847995;R-HSA-9634702
R-HSA-8848021	Signaling by PTK6	6	71	0.00497512	0.608276	0.880731	15	53	0.00390366	9606	Homo sapiens	ERBB3;NRG4;EPAS1;LRRK2;STAT3;LINC01139		R-HSA-8848005;R-HSA-8848804;R-HSA-8856930;R-HSA-8857583;R-HSA-2730595;R-HSA-8848812;R-HSA-8857577;R-HSA-2730599;R-HSA-8848087;R-HSA-8848150;R-HSA-8848178;R-HSA-8857565;R-HSA-8848124;R-HSA-8847995;R-HSA-9634702
R-HSA-2559586	DNA Damage/Telomere Stress Induced Senescence	6	71	0.00497512	0.608276	0.880731	2	18	0.00132577	9606	Homo sapiens	HIST1H2BJ;HIST1H2AD;HIST1H2BG;HIST1H1C		R-HSA-3785711;R-HSA-4647594
R-HSA-210993	Tie2 Signaling	2	23	0.00161166	0.608865	0.880731	14	14	0.00103116	9606	Homo sapiens	GRB7;TEK		R-HSA-210881;R-HSA-210977;R-HSA-204871;R-HSA-204773;R-HSA-204779;R-HSA-204873;R-HSA-204813;R-HSA-204850;R-HSA-204824;R-HSA-210872;R-HSA-204863;R-HSA-210974;R-HSA-204798;R-HSA-204861
R-HSA-3928664	Ephrin signaling	2	23	0.00161166	0.608865	0.880731	11	11	0.000810194	9606	Homo sapiens	FYN;EPHB3		R-HSA-3928633;R-HSA-3928639;R-HSA-3928594;R-HSA-3928625;R-HSA-3928641;R-HSA-3928640;R-HSA-3928631;R-HSA-3928615;R-HSA-3928614;R-HSA-3928580;R-HSA-4093329
R-HSA-432142	Platelet sensitization by LDL	2	23	0.00161166	0.608865	0.880731	4	9	0.000662886	9606	Homo sapiens	PLA2G4A;LRP8		R-HSA-428961;R-HSA-432129;R-HSA-8948034;R-HSA-432121
R-HSA-8849932	Synaptic adhesion-like molecules	2	23	0.00161166	0.608865	0.880731	3	8	0.000589232	9606	Homo sapiens	GRIN2A;GRIA4		R-HSA-8849878;R-HSA-8849906;R-HSA-8849881
R-HSA-2979096	NOTCH2 Activation and Transmission of Signal to the Nucleus	2	23	0.00161166	0.608865	0.880731	3	11	0.000810194	9606	Homo sapiens	NEURL1B;DLL1		R-HSA-2172172;R-HSA-1980048;R-HSA-157629
R-HSA-1606322	ZBP1(DAI) mediated induction of type I IFNs	2	23	0.00161166	0.608865	0.880731	2	11	0.000810194	9606	Homo sapiens	NLRP4;NFKBIB		R-HSA-168140;R-HSA-1606327
R-HSA-5633008	TP53 Regulates Transcription of Cell Death Genes	7	83	0.00581599	0.610754	0.880731	6	68	0.00500847	9606	Homo sapiens	TP53INP1;CASP1;TNFRSF10B		R-HSA-5633414;R-HSA-5633441;R-HSA-6798082;R-HSA-6798081;R-HSA-6799418;R-HSA-6799416
R-HSA-9670095	Inhibition of DNA recombination at telomere	4	48	0.00336346	0.621151	0.880731	3	4	0.000294616	9606	Homo sapiens	HIST1H2BJ;HIST1H2AD;HIST1H2BG		R-HSA-9670114;R-HSA-9670149;R-HSA-9670101
R-HSA-111996	Ca-dependent events	4	48	0.00336346	0.621151	0.880731	9	27	0.00198866	9606	Homo sapiens	CAMK2B;PDE1B;PLA2G4A;ADCY2		R-HSA-111955;R-HSA-442725;R-HSA-111956;R-HSA-111881;R-HSA-111883;R-HSA-111930;R-HSA-111898;R-HSA-9617583;R-HSA-444792
R-HSA-157118	Signaling by NOTCH	22	259	0.0181487	0.623154	0.880731	58	154	0.0113427	9606	Homo sapiens	HDAC4;POGLUT1;HIST1H2BJ;WWC1;NOTCH4;HDAC9;DLL1;DLK1;RUNX1;NEURL1B;HEYL;PSMC4;HEY2;HIST1H2AD;HIST1H2BG;HIST1H3D		R-HSA-1912349;R-HSA-9604247;R-HSA-9604629;R-HSA-1980048;R-HSA-1980039;R-HSA-4396382;R-HSA-9021480;R-HSA-1912382;R-HSA-1912379;R-HSA-1912378;R-HSA-1912372;R-HSA-9604664;R-HSA-1912374;R-HSA-1912369;R-HSA-2172172;R-HSA-9013284;R-HSA-1912368;R-HSA-9021478;R-HSA-9604642;R-HSA-9604387;R-HSA-1912364;R-HSA-9013693;R-HSA-9605414;R-HSA-1980074;R-HSA-9604264;R-HSA-2168987;R-HSA-1912353;R-HSA-1912352;R-HSA-1…
R-HSA-380972	Energy dependent regulation of mTOR by LKB1-AMPK	3	36	0.0025226	0.623809	0.880731	6	7	0.000515578	9606	Homo sapiens	CAB39L;STRADB;PRKAG2		R-HSA-380949;R-HSA-447074;R-HSA-200421;R-HSA-380930;R-HSA-380927;R-HSA-380942
R-HSA-8939246	RUNX1 regulates transcription of genes involved in differentiation of myeloid cells	1	11	0.000770794	0.625866	0.880731	7	7	0.000515578	9606	Homo sapiens	RUNX1		R-HSA-8939066;R-HSA-8938251;R-HSA-8939054;R-HSA-8938382;R-HSA-8938228;R-HSA-8938389;R-HSA-8938231
R-HSA-9660537	Signaling by MRAS-complex mutants	1	11	0.000770794	0.625866	0.880731	2	2	0.000147308	9606	Homo sapiens	MRAS		R-HSA-9660538;R-HSA-9660536
R-HSA-9726842	Gain-of-function MRAS complexes activate RAF signaling	1	11	0.000770794	0.625866	0.880731	1	1	7.3654e-05	9606	Homo sapiens	MRAS		R-HSA-9660538
R-HSA-164940	Nef mediated downregulation of MHC class I complex cell surface expression	1	11	0.000770794	0.625866	0.880731	3	4	0.000294616	9606	Homo sapiens	AP1S3		R-HSA-182263;R-HSA-182279;R-HSA-182286
R-HSA-163680	AMPK inhibits chREBP transcriptional activation activity	1	11	0.000770794	0.625866	0.880731	3	4	0.000294616	9606	Homo sapiens	PRKAG2		R-HSA-163664;R-HSA-164151;R-HSA-163691
R-HSA-77588	SLBP Dependent Processing of Replication-Dependent Histone Pre-mRNAs	1	11	0.000770794	0.625866	0.880731	2	3	0.000220962	9606	Homo sapiens	SNRPG;SNRPGP15		R-HSA-77585;R-HSA-77586
R-HSA-444473	Formyl peptide receptors bind formyl peptides and many other ligands	1	11	0.000770794	0.625866	0.880731	2	3	0.000220962	9606	Homo sapiens	ANXA1		R-HSA-444476;R-HSA-391913
R-HSA-9020933	Interleukin-23 signaling	1	11	0.000770794	0.625866	0.880731	6	12	0.000883848	9606	Homo sapiens	STAT3		R-HSA-8950780;R-HSA-8950269;R-HSA-8952749;R-HSA-8950724;R-HSA-8950583;R-HSA-8952823
R-HSA-3371378	Regulation by c-FLIP	1	11	0.000770794	0.625866	0.880731	2	4	0.000294616	9606	Homo sapiens	TNFRSF10B		R-HSA-3465448;R-HSA-3371359
R-HSA-888593	Reuptake of GABA	1	11	0.000770794	0.625866	0.880731	1	2	0.000147308	9606	Homo sapiens	SLC6A1		R-HSA-444007
R-HSA-68689	CDC6 association with the ORC:origin complex	1	11	0.000770794	0.625866	0.880731	1	2	0.000147308	9606	Homo sapiens	ORC2		R-HSA-68688
R-HSA-8985947	Interleukin-9 signaling	1	11	0.000770794	0.625866	0.880731	5	13	0.000957502	9606	Homo sapiens	STAT3		R-HSA-8985929;R-HSA-8985981;R-HSA-8985900;R-HSA-8985966;R-HSA-8985988
R-HSA-69416	Dimerization of procaspase-8	1	11	0.000770794	0.625866	0.880731	1	3	0.000220962	9606	Homo sapiens	TNFRSF10B		R-HSA-141156
R-HSA-444257	RSK activation	1	11	0.000770794	0.625866	0.880731	1	4	0.000294616	9606	Homo sapiens	PDK1		R-HSA-442739
R-HSA-442380	Zinc influx into cells by the SLC39 gene family	1	11	0.000770794	0.625866	0.880731	1	6	0.000441924	9606	Homo sapiens	SLC39A8		R-HSA-442387
R-HSA-442729	CREB1 phosphorylation through the activation of CaMKII/CaMKK/CaMKIV cascasde	1	11	0.000770794	0.625866	0.880731	1	10	0.00073654	9606	Homo sapiens	CAMK2B		R-HSA-444792
R-HSA-2243919	Crosslinking of collagen fibrils	2	24	0.00168173	0.631864	0.880731	3	13	0.000957502	9606	Homo sapiens	LOXL3;PCOLCE		R-HSA-2022141;R-HSA-2395340;R-HSA-2002466
R-HSA-449836	Other interleukin signaling	2	24	0.00168173	0.631864	0.880731	3	17	0.00125212	9606	Homo sapiens	SNAP25;CSF1		R-HSA-9009485;R-HSA-9009488;R-HSA-449117
R-HSA-8964058	HDL remodeling	2	24	0.00168173	0.631864	0.880731	2	13	0.000957502	9606	Homo sapiens	LIPG;ALB		R-HSA-264679;R-HSA-8980228
R-HSA-1834941	STING mediated induction of host immune responses	2	24	0.00168173	0.631864	0.880731	2	19	0.00139943	9606	Homo sapiens	NLRP4;NLRC3		R-HSA-1834939;R-HSA-2396007
R-HSA-112040	G-protein mediated events	6	73	0.00511527	0.634709	0.880731	18	41	0.00301981	9606	Homo sapiens	CAMK2B;GNAL;PDE1B;GNAT3;PLA2G4A;ADCY2		R-HSA-442725;R-HSA-170666;R-HSA-111881;R-HSA-111883;R-HSA-392206;R-HSA-170671;R-HSA-170674;R-HSA-170672;R-HSA-111955;R-HSA-111956;R-HSA-170676;R-HSA-170677;R-HSA-111930;R-HSA-111898;R-HSA-170686;R-HSA-9617583;R-HSA-444792;R-HSA-170685
R-HSA-913709	O-linked glycosylation of mucins	6	73	0.00511527	0.634709	0.880731	5	17	0.00125212	9606	Homo sapiens	GALNT6;ST6GAL1;WBSCR17;GALNT4;B3GNT7;GCNT4		R-HSA-977071;R-HSA-914012;R-HSA-977228;R-HSA-913675;R-HSA-914010
R-HSA-3214841	PKMTs methylate histone lysines	4	49	0.00343354	0.637078	0.880731	19	22	0.00162039	9606	Homo sapiens	PRDM16;SMYD3;HIST1H3D		R-HSA-5637686;R-HSA-5159245;R-HSA-5244692;R-HSA-5634802;R-HSA-5638332;R-HSA-5638333;R-HSA-5634750;R-HSA-5638141;R-HSA-5651654;R-HSA-5649799;R-HSA-5649764;R-HSA-5638157;R-HSA-5634729;R-HSA-5649802;R-HSA-4827383;R-HSA-5649800;R-HSA-5651657;R-HSA-5649801;R-HSA-4827382
R-HSA-445355	Smooth Muscle Contraction	4	49	0.00343354	0.637078	0.880731	7	11	0.000810194	9606	Homo sapiens	GUCY1A2;ANXA1;ANXA2;MYH11		R-HSA-445700;R-HSA-445699;R-HSA-392143;R-HSA-5263628;R-HSA-392152;R-HSA-445704;R-HSA-445705
R-HSA-9609736	Assembly and cell surface presentation of NMDA receptors	4	49	0.00343354	0.637078	0.880731	14	23	0.00169404	9606	Homo sapiens	CAMK2B;GRIN2A;NEFL;KIF17		R-HSA-9609746;R-HSA-9610802;R-HSA-9610195;R-HSA-9611030;R-HSA-9610327;R-HSA-9610270;R-HSA-9610750;R-HSA-9610879;R-HSA-9610653;R-HSA-9610627;R-HSA-9609738;R-HSA-9611368;R-HSA-9610408;R-HSA-9609742
R-HSA-5250924	B-WICH complex positively regulates rRNA expression	5	62	0.00434447	0.649075	0.880731	1	3	0.000220962	9606	Homo sapiens	HIST1H2BJ;HIST1H2AD;HIST1H2BG;HIST1H3D		R-HSA-5250938
R-HSA-991365	Activation of GABAB receptors	4	50	0.00350361	0.652562	0.880731	8	8	0.000589232	9606	Homo sapiens	GNAL;GNAT3;GNG4;ADCY2		R-HSA-170674;R-HSA-1013020;R-HSA-170666;R-HSA-1013013;R-HSA-392206;R-HSA-1013012;R-HSA-170686;R-HSA-170671
R-HSA-977444	GABA B receptor activation	4	50	0.00350361	0.652562	0.880731	8	9	0.000662886	9606	Homo sapiens	GNAL;GNAT3;GNG4;ADCY2		R-HSA-170674;R-HSA-1013020;R-HSA-170666;R-HSA-1013013;R-HSA-392206;R-HSA-1013012;R-HSA-170686;R-HSA-170671
R-HSA-373753	Nephrin family interactions	2	25	0.0017518	0.653793	0.880731	8	13	0.000957502	9606	Homo sapiens	KIRREL3;FYN		R-HSA-532603;R-HSA-373734;R-HSA-373747;R-HSA-8981534;R-HSA-451758;R-HSA-373724;R-HSA-373727;R-HSA-451757
R-HSA-389513	CTLA4 inhibitory signaling	2	25	0.0017518	0.653793	0.880731	2	5	0.00036827	9606	Homo sapiens	LYN;FYN		R-HSA-388833;R-HSA-388829
R-HSA-9634635	Estrogen-stimulated signaling through PRKCZ	1	12	0.000840866	0.657867	0.880731	6	6	0.000441924	9606	Homo sapiens	PDK1		R-HSA-9632918;R-HSA-9632906;R-HSA-9632858;R-HSA-9632910;R-HSA-437195;R-HSA-437192
R-HSA-937042	IRAK2 mediated activation of TAK1 complex	1	12	0.000840866	0.657867	0.880731	5	5	0.00036827	9606	Homo sapiens	IRAK2		R-HSA-936942;R-HSA-936991;R-HSA-936986;R-HSA-936963;R-HSA-936960
R-HSA-9013700	NOTCH4 Activation and Transmission of Signal to the Nucleus	1	12	0.000840866	0.657867	0.880731	5	5	0.00036827	9606	Homo sapiens	NOTCH4		R-HSA-9604294;R-HSA-9604247;R-HSA-9604308;R-HSA-9604264;R-HSA-2168987
R-HSA-448706	Interleukin-1 processing	1	12	0.000840866	0.657867	0.880731	4	5	0.00036827	9606	Homo sapiens	CASP1		R-HSA-448678;R-HSA-448673;R-HSA-448702;R-HSA-448703
R-HSA-201688	WNT mediated activation of DVL	1	12	0.000840866	0.657867	0.880731	2	4	0.000294616	9606	Homo sapiens	PIP5K1B		R-HSA-3772434;R-HSA-3772436
R-HSA-8866907	Activation of the TFAP2 (AP-2) family of transcription factors	1	12	0.000840866	0.657867	0.880731	2	4	0.000294616	9606	Homo sapiens	TFAP2A		R-HSA-8864278;R-HSA-8864307
R-HSA-2534343	Interaction With Cumulus Cells And The Zona Pellucida	1	12	0.000840866	0.657867	0.880731	1	2	0.000147308	9606	Homo sapiens	OVGP1		R-HSA-1297338
R-HSA-433692	Proton-coupled monocarboxylate transport	1	12	0.000840866	0.657867	0.880731	1	2	0.000147308	9606	Homo sapiens	EMB		R-HSA-433698
R-HSA-450341	Activation of the AP-1 family of transcription factors	1	12	0.000840866	0.657867	0.880731	2	5	0.00036827	9606	Homo sapiens	FOS		R-HSA-450292;R-HSA-450325
R-HSA-9020958	Interleukin-21 signaling	1	12	0.000840866	0.657867	0.880731	2	5	0.00036827	9606	Homo sapiens	STAT3		R-HSA-9006873;R-HSA-9006870
R-HSA-418889	Caspase activation via Dependence Receptors in the absence of ligand	1	12	0.000840866	0.657867	0.880731	2	8	0.000589232	9606	Homo sapiens	UNC5B		R-HSA-418852;R-HSA-418849
R-HSA-75072	mRNA Editing	1	12	0.000840866	0.657867	0.880731	2	9	0.000662886	9606	Homo sapiens	APOBEC3B		R-HSA-77609;R-HSA-83677
R-HSA-9613354	Lipophagy	1	12	0.000840866	0.657867	0.880731	1	5	0.00036827	9606	Homo sapiens	PRKAG2		R-HSA-9613530
R-HSA-428542	Regulation of commissural axon pathfinding by SLIT and ROBO	1	12	0.000840866	0.657867	0.880731	1	5	0.00036827	9606	Homo sapiens	SLIT3		R-HSA-373715
R-HSA-8851680	Butyrophilin (BTN) family interactions	1	12	0.000840866	0.657867	0.880731	1	8	0.000589232	9606	Homo sapiens	BTNL9		R-HSA-8851979
R-HSA-264870	Caspase-mediated cleavage of cytoskeletal proteins	1	12	0.000840866	0.657867	0.880731	1	10	0.00073654	9606	Homo sapiens	GAS2		R-HSA-201639
R-HSA-9009391	Extra-nuclear estrogen signaling	9	111	0.00777801	0.65861	0.880731	24	38	0.00279885	9606	Homo sapiens	NOS3;GNAT3;GNG4;S1PR3;FOS;EMB;ESR2;PDK1		R-HSA-9021609;R-HSA-9624272;R-HSA-9632918;R-HSA-9632182;R-HSA-9021068;R-HSA-9633044;R-HSA-9625813;R-HSA-9021601;R-HSA-9632858;R-HSA-9021600;R-HSA-9625465;R-HSA-202127;R-HSA-437195;R-HSA-437192;R-HSA-9021596;R-HSA-9021660;R-HSA-9625479;R-HSA-9632906;R-HSA-9021072;R-HSA-9632873;R-HSA-9021170;R-HSA-9632910;R-HSA-9021079;R-HSA-9027670
R-HSA-9013407	RHOH GTPase cycle	3	38	0.00266274	0.659654	0.880731	2	3	0.000220962	9606	Homo sapiens	ARHGDIB;PAK7;UACA		R-HSA-9018754;R-HSA-9018758
R-HSA-2129379	Molecules associated with elastic fibres	3	38	0.00266274	0.659654	0.880731	5	10	0.00073654	9606	Homo sapiens	MFAP2;ITGA8;GDF5		R-HSA-2161282;R-HSA-2328048;R-HSA-2396399;R-HSA-1592387;R-HSA-2395320
R-HSA-3214815	HDACs deacetylate histones	5	63	0.00441455	0.6627	0.880731	4	5	0.00036827	9606	Homo sapiens	HIST1H2BJ;HIST1H2AD;HIST1H2BG;HIST1H3D		R-HSA-3777129;R-HSA-3782637;R-HSA-3782655;R-HSA-3769447
R-HSA-110329	Cleavage of the damaged pyrimidine	4	51	0.00357368	0.667598	0.880731	1	20	0.00147308	9606	Homo sapiens	HIST1H2BJ;HIST1H2AD;HIST1H2BG		R-HSA-9629497
R-HSA-73928	Depyrimidination	4	51	0.00357368	0.667598	0.880731	2	41	0.00301981	9606	Homo sapiens	HIST1H2BJ;HIST1H2AD;HIST1H2BG		R-HSA-9629497;R-HSA-9629372
R-HSA-5602498	MyD88 deficiency (TLR2/4)	2	26	0.00182188	0.674665	0.880731	2	2	0.000147308	9606	Homo sapiens	FGG;CD36		R-HSA-5602383;R-HSA-5602606
R-HSA-392170	ADP signalling through P2Y purinoceptor 12	2	26	0.00182188	0.674665	0.880731	3	4	0.000294616	9606	Homo sapiens	GNAT3;GNG4		R-HSA-392195;R-HSA-392187;R-HSA-392202
R-HSA-3322077	Glycogen synthesis	2	26	0.00182188	0.674665	0.880731	10	24	0.0017677	9606	Homo sapiens	PPP1R3C;NHLRC1		R-HSA-3781001;R-HSA-3781018;R-HSA-3781021;R-HSA-3781023;R-HSA-3781009;R-HSA-3781024;R-HSA-3780995;R-HSA-3781011;R-HSA-3780994;R-HSA-3780997
R-HSA-73772	RNA Polymerase I Promoter Escape	5	64	0.00448462	0.675976	0.880731	1	2	0.000147308	9606	Homo sapiens	HIST1H2BJ;HIST1H2AD;HIST1H2BG;HIST1H3D		R-HSA-74986
R-HSA-445989	TAK1 activates NFkB by phosphorylation and activation of IKKs complex	3	39	0.00273281	0.676625	0.880731	4	5	0.00036827	9606	Homo sapiens	BCAM;IRAK2;NFKBIB		R-HSA-168166;R-HSA-9630923;R-HSA-168184;R-HSA-168140
R-HSA-354192	Integrin signaling	3	39	0.00273281	0.676625	0.880731	17	24	0.0017677	9606	Homo sapiens	FGG;RAPGEF3;PDK1		R-HSA-354149;R-HSA-429415;R-HSA-354087;R-HSA-372705;R-HSA-429441;R-HSA-432110;R-HSA-377644;R-HSA-354124;R-HSA-377641;R-HSA-377640;R-HSA-377643;R-HSA-939265;R-HSA-372693;R-HSA-354165;R-HSA-354066;R-HSA-372697;R-HSA-354073
R-HSA-6804758	Regulation of TP53 Activity through Acetylation	3	39	0.00273281	0.676625	0.880731	7	14	0.00103116	9606	Homo sapiens	CPNE9;ING5;PIP4K2A		R-HSA-6805638;R-HSA-6805620;R-HSA-6805650;R-HSA-6811522;R-HSA-8877692;R-HSA-8877691;R-HSA-6805640
R-HSA-442742	CREB1 phosphorylation through NMDA receptor-mediated activation of RAS signaling	3	39	0.00273281	0.676625	0.880731	3	7	0.000515578	9606	Homo sapiens	CAMK2B;NEFL;PDK1		R-HSA-442739;R-HSA-442732;R-HSA-442760
R-HSA-159418	Recycling of bile acids and salts	3	39	0.00273281	0.676625	0.880731	5	17	0.00125212	9606	Homo sapiens	FABP6;ALB;ABCC9		R-HSA-9733973;R-HSA-9733969;R-HSA-194153;R-HSA-9733960;R-HSA-9733545
R-HSA-6806667	Metabolism of fat-soluble vitamins	7	89	0.00623642	0.681414	0.880731	7	34	0.00250424	9606	Homo sapiens	TTPA;AKR1C1;SDC2;LPL;GPC4;LRP8		R-HSA-8874705;R-HSA-2404131;R-HSA-8874718;R-HSA-2395768;R-HSA-2423785;R-HSA-2429643;R-HSA-2855252
R-HSA-3928662	EPHB-mediated forward signaling	4	52	0.00364375	0.682182	0.880731	21	26	0.001915	9606	Homo sapiens	LYN;SDC2;FYN;EPHB3		R-HSA-4093342;R-HSA-3928601;R-HSA-3928600;R-HSA-3928632;R-HSA-4093339;R-HSA-4093336;R-HSA-3928627;R-HSA-3928595;R-HSA-4093332;R-HSA-3928592;R-HSA-4093330;R-HSA-4093331;R-HSA-3928598;R-HSA-3928617;R-HSA-3928623;R-HSA-3928588;R-HSA-3928610;R-HSA-3928583;R-HSA-3928645;R-HSA-3928644;R-HSA-3928612
R-HSA-8864260	Transcriptional regulation by the AP-2 (TFAP2) family of transcription factors	4	52	0.00364375	0.682182	0.880731	33	44	0.00324077	9606	Homo sapiens	TFAP2A;KCTD1;KCTD15		R-HSA-8869575;R-HSA-8864453;R-HSA-8869568;R-HSA-8864718;R-HSA-8869580;R-HSA-8864395;R-HSA-8864343;R-HSA-3234081;R-HSA-8869590;R-HSA-8864278;R-HSA-8864466;R-HSA-8864989;R-HSA-8865244;R-HSA-8864412;R-HSA-8864729;R-HSA-8864999;R-HSA-8869543;R-HSA-8869542;R-HSA-8864737;R-HSA-8864431;R-HSA-8869549;R-HSA-8864426;R-HSA-8864361;R-HSA-8865256;R-HSA-8864936;R-HSA-8869558;R-HSA-8864307;R-HSA-8864690;R-HSA-8…
R-HSA-190828	Gap junction trafficking	4	52	0.00364375	0.682182	0.880731	14	20	0.00147308	9606	Homo sapiens	GJA1;GJA5;CLTCL1;DNM1		R-HSA-191072;R-HSA-190662;R-HSA-190790;R-HSA-190788;R-HSA-190829;R-HSA-196017;R-HSA-190519;R-HSA-190682;R-HSA-196026;R-HSA-190520;R-HSA-191737;R-HSA-190686;R-HSA-190782;R-HSA-190877
R-HSA-5218859	Regulated Necrosis	6	77	0.00539556	0.684288	0.880731	9	57	0.00419828	9606	Homo sapiens	IRF1;CASP4;CASP1;PELI1;TNFRSF10B		R-HSA-9710101;R-HSA-3465429;R-HSA-9710294;R-HSA-9647680;R-HSA-9710295;R-HSA-5675456;R-HSA-9686922;R-HSA-5213462;R-HSA-9686920
R-HSA-9027277	Erythropoietin activates Phospholipase C gamma (PLCG)	1	13	0.000910938	0.687133	0.880731	3	3	0.000220962	9606	Homo sapiens	LYN		R-HSA-9027373;R-HSA-9032478;R-HSA-9027425
R-HSA-1236973	Cross-presentation of particulate exogenous antigens (phagosomes)	1	13	0.000910938	0.687133	0.880731	2	3	0.000220962	9606	Homo sapiens	CD36		R-HSA-1236958;R-HSA-1236956
R-HSA-2151209	Activation of PPARGC1A (PGC-1alpha) by phosphorylation	1	13	0.000910938	0.687133	0.880731	1	2	0.000147308	9606	Homo sapiens	PRKAG2		R-HSA-1592244
R-HSA-426048	Arachidonate production from DAG	1	13	0.000910938	0.687133	0.880731	1	3	0.000220962	9606	Homo sapiens	DAGLA		R-HSA-426032
R-HSA-428359	Insulin-like Growth Factor-2 mRNA Binding Proteins (IGF2BPs/IMPs/VICKZs) bind RNA	1	13	0.000910938	0.687133	0.880731	1	3	0.000220962	9606	Homo sapiens	H19		R-HSA-428296
R-HSA-2586552	Signaling by Leptin	1	13	0.000910938	0.687133	0.880731	5	19	0.00139943	9606	Homo sapiens	STAT3		R-HSA-2671850;R-HSA-2671868;R-HSA-2671839;R-HSA-2730595;R-HSA-2730599
R-HSA-5578768	Physiological factors	1	13	0.000910938	0.687133	0.880731	1	4	0.000294616	9606	Homo sapiens	NPR2		R-HSA-5692408
R-HSA-111932	CaMK IV-mediated phosphorylation of CREB	1	13	0.000910938	0.687133	0.880731	3	13	0.000957502	9606	Homo sapiens	CAMK2B		R-HSA-442725;R-HSA-9617583;R-HSA-444792
R-HSA-375281	Hormone ligand-binding receptors	1	13	0.000910938	0.687133	0.880731	1	5	0.00036827	9606	Homo sapiens	TSHR		R-HSA-391375
R-HSA-1296346	Tandem pore domain potassium channels	1	13	0.000910938	0.687133	0.880731	1	6	0.000441924	9606	Homo sapiens	KCNK3		R-HSA-1299318
R-HSA-9627069	Regulation of the apoptosome activity	1	13	0.000910938	0.687133	0.880731	1	6	0.000441924	9606	Homo sapiens	UACA		R-HSA-6804652
R-HSA-74749	Signal attenuation	1	13	0.000910938	0.687133	0.880731	1	7	0.000515578	9606	Homo sapiens	GRB10		R-HSA-110011
R-HSA-111458	Formation of apoptosome	1	13	0.000910938	0.687133	0.880731	1	10	0.00073654	9606	Homo sapiens	UACA		R-HSA-6804652
R-HSA-9664873	Pexophagy	1	13	0.000910938	0.687133	0.880731	1	13	0.000957502	9606	Homo sapiens	EPAS1		R-HSA-9664871
R-HSA-390522	Striated Muscle Contraction	3	40	0.00280289	0.692961	0.880731	4	4	0.000294616	9606	Homo sapiens	MYBPC3;MYH3;TNNT1		R-HSA-390597;R-HSA-390598;R-HSA-390593;R-HSA-390595
R-HSA-114508	Effects of PIP2 hydrolysis	3	40	0.00280289	0.692961	0.880731	3	9	0.000662886	9606	Homo sapiens	DAGLA;PRKCQ;DGKI		R-HSA-425861;R-HSA-426240;R-HSA-426032
R-HSA-168638	NOD1/2 Signaling Pathway	3	40	0.00280289	0.692961	0.880731	2	18	0.00132577	9606	Homo sapiens	IRAK2;CASP4;CASP1		R-HSA-168184;R-HSA-622420
R-HSA-5603041	IRAK4 deficiency (TLR2/4)	2	27	0.00189195	0.694502	0.880731	2	2	0.000147308	9606	Homo sapiens	FGG;CD36		R-HSA-5602353;R-HSA-5602672
R-HSA-442982	Ras activation upon Ca2+ influx through NMDA receptor	2	27	0.00189195	0.694502	0.880731	2	2	0.000147308	9606	Homo sapiens	CAMK2B;NEFL		R-HSA-442732;R-HSA-442760
R-HSA-174403	Glutathione synthesis and recycling	2	27	0.00189195	0.694502	0.880731	1	9	0.000662886	9606	Homo sapiens	GGT5;GGT6		R-HSA-8943279
R-HSA-381426	Regulation of Insulin-like Growth Factor (IGF) transport and uptake by Insulin-like Growth Factor Binding Proteins (IGFBPs)	10	127	0.00889917	0.696939	0.880731	1	14	0.00103116	9606	Homo sapiens	CSF1;EVA1A;SDC2;ALB;FGG;SPP1;SPARCL1;CABP1;AFP;APOL1		R-HSA-8952289
R-HSA-975634	Retinoid metabolism and transport	6	79	0.0055357	0.707358	0.880731	5	28	0.00206231	9606	Homo sapiens	AKR1C1;SDC2;LPL;GPC4;LRP8		R-HSA-2404131;R-HSA-2395768;R-HSA-2423785;R-HSA-2429643;R-HSA-2855252
R-HSA-5617472	Activation of anterior HOX genes in hindbrain development during early embryogenesis	9	116	0.00812837	0.707614	0.880731	32	43	0.00316712	9606	Homo sapiens	HIST1H2BJ;HIST1H2AD;HOXC4;PAX6;HIST1H2BG;HIST1H3D		R-HSA-5617877;R-HSA-5617492;R-HSA-5617431;R-HSA-5621010;R-HSA-5617874;R-HSA-6810159;R-HSA-6810158;R-HSA-5617887;R-HSA-5617862;R-HSA-6810161;R-HSA-5617859;R-HSA-5617484;R-HSA-5617676;R-HSA-5693644;R-HSA-5617486;R-HSA-5617672;R-HSA-5617483;R-HSA-5617867;R-HSA-5621002;R-HSA-5617866;R-HSA-5617462;R-HSA-5617650;R-HSA-5617661;R-HSA-5617471;R-HSA-5617855;R-HSA-5617445;R-HSA-5617452;R-HSA-5617454;R-HSA-6…
R-HSA-5619507	Activation of HOX genes during differentiation	9	116	0.00812837	0.707614	0.880731	32	43	0.00316712	9606	Homo sapiens	HIST1H2BJ;HIST1H2AD;HOXC4;PAX6;HIST1H2BG;HIST1H3D		R-HSA-5617877;R-HSA-5617492;R-HSA-5617431;R-HSA-5621010;R-HSA-5617874;R-HSA-6810159;R-HSA-6810158;R-HSA-5617887;R-HSA-5617862;R-HSA-6810161;R-HSA-5617859;R-HSA-5617484;R-HSA-5617676;R-HSA-5693644;R-HSA-5617486;R-HSA-5617672;R-HSA-5617483;R-HSA-5617867;R-HSA-5621002;R-HSA-5617866;R-HSA-5617462;R-HSA-5617650;R-HSA-5617661;R-HSA-5617471;R-HSA-5617855;R-HSA-5617445;R-HSA-5617452;R-HSA-5617454;R-HSA-6…
R-HSA-5663213	RHO GTPases Activate WASPs and WAVEs	3	41	0.00287296	0.708668	0.880731	8	10	0.00073654	9606	Homo sapiens	ABI2;WIPF1;WIPF3		R-HSA-2130194;R-HSA-2197698;R-HSA-2029469;R-HSA-2029466;R-HSA-442592;R-HSA-2029465;R-HSA-2197691;R-HSA-2197690
R-HSA-392518	Signal amplification	3	41	0.00287296	0.708668	0.880731	13	19	0.00139943	9606	Homo sapiens	GNAT3;GNG4;PLA2G4A		R-HSA-392195;R-HSA-428961;R-HSA-428750;R-HSA-428909;R-HSA-428749;R-HSA-392202;R-HSA-428918;R-HSA-428917;R-HSA-418581;R-HSA-418579;R-HSA-428752;R-HSA-418576;R-HSA-392187
R-HSA-606279	Deposition of new CENPA-containing nucleosomes at the centromere	4	54	0.0037839	0.709985	0.880731	2	4	0.000294616	9606	Homo sapiens	HIST1H2BJ;HIST1H2AD;HIST1H2BG		R-HSA-606287;R-HSA-606289
R-HSA-774815	Nucleosome assembly	4	54	0.0037839	0.709985	0.880731	2	4	0.000294616	9606	Homo sapiens	HIST1H2BJ;HIST1H2AD;HIST1H2BG		R-HSA-606287;R-HSA-606289
R-HSA-75153	Apoptotic execution phase	4	54	0.0037839	0.709985	0.880731	4	57	0.00419828	9606	Homo sapiens	GAS2;PRKCQ;HIST1H1C		R-HSA-201603;R-HSA-201639;R-HSA-211239;R-HSA-211247
R-HSA-397014	Muscle contraction	17	213	0.0149254	0.712019	0.880731	20	42	0.00309347	9606	Homo sapiens	CAMK2B;MYBPC3;GUCY1A2;ANXA1;ANXA2;KCND2;NPR2;ATP2B3;CACNA2D2;ABCC9;RYR3;MYH3;TNNT1;MYH11;FGF12;SCN1B;KCNK3		R-HSA-390597;R-HSA-427910;R-HSA-445700;R-HSA-418309;R-HSA-390598;R-HSA-5678261;R-HSA-390593;R-HSA-445699;R-HSA-390595;R-HSA-5577234;R-HSA-2855020;R-HSA-5577213;R-HSA-5576895;R-HSA-392143;R-HSA-5578910;R-HSA-5692408;R-HSA-445704;R-HSA-445705;R-HSA-5263628;R-HSA-392152
R-HSA-168799	Neurotoxicity of clostridium toxins	2	28	0.00196202	0.713328	0.880731	15	40	0.00294616	9606	Homo sapiens	SNAP25;SV2A		R-HSA-194818;R-HSA-5244500;R-HSA-5244503;R-HSA-5250616;R-HSA-5244506;R-HSA-194793;R-HSA-5250875;R-HSA-5244415;R-HSA-5250880;R-HSA-194800;R-HSA-5250884;R-HSA-5244424;R-HSA-5250600;R-HSA-5244428;R-HSA-5250607
R-HSA-400451	Free fatty acids regulate insulin secretion	2	28	0.00196202	0.713328	0.880731	2	7	0.000515578	9606	Homo sapiens	ACSL4;CD36		R-HSA-434382;R-HSA-434381
R-HSA-975578	Reactions specific to the complex N-glycan synthesis pathway	2	28	0.00196202	0.713328	0.880731	2	7	0.000515578	9606	Homo sapiens	FUCA1;KCTD15		R-HSA-6786034;R-HSA-5693807
R-HSA-71384	Ethanol oxidation	2	28	0.00196202	0.713328	0.880731	2	8	0.000589232	9606	Homo sapiens	ALDH1A1;ACSS1		R-HSA-449911;R-HSA-71691
R-HSA-9013507	NOTCH3 Activation and Transmission of Signal to the Nucleus	2	28	0.00196202	0.713328	0.880731	3	15	0.00110481	9606	Homo sapiens	NEURL1B;DLL1		R-HSA-9013069;R-HSA-157145;R-HSA-9013284
R-HSA-6804115	TP53 regulates transcription of additional cell cycle genes whose exact role in the p53 pathway remain uncertain	2	28	0.00196202	0.713328	0.880731	2	14	0.00103116	9606	Homo sapiens	PLAGL1		R-HSA-6803935;R-HSA-6803946
R-HSA-9033241	Peroxisomal protein import	5	67	0.00469484	0.713682	0.880731	13	26	0.001915	9606	Homo sapiens	ACOX2;ACOT2;PAF1;PIPOX;CROT		R-HSA-9033514;R-HSA-9033485;R-HSA-9033516;R-HSA-9033505;R-HSA-8953946;R-HSA-9033499;R-HSA-9033533;R-HSA-8953917;R-HSA-9033233;R-HSA-9033235;R-HSA-9033236;R-HSA-9033527;R-HSA-9033238
R-HSA-5218900	CASP8 activity is inhibited	1	14	0.00098101	0.713897	0.880731	2	3	0.000220962	9606	Homo sapiens	TNFRSF10B		R-HSA-3465429;R-HSA-5675456
R-HSA-5658623	FGFRL1 modulation of FGFR1 signaling	1	14	0.00098101	0.713897	0.880731	1	2	0.000147308	9606	Homo sapiens	SPRED2		R-HSA-5654510
R-HSA-1483226	Synthesis of PI	1	14	0.00098101	0.713897	0.880731	1	3	0.000220962	9606	Homo sapiens	PITPNM3		R-HSA-8869241
R-HSA-9664535	LTC4-CYSLTR mediated IL4 production	1	14	0.00098101	0.713897	0.880731	1	3	0.000220962	9606	Homo sapiens	GGT5		R-HSA-266046
R-HSA-5357786	TNFR1-induced proapoptotic signaling	1	14	0.00098101	0.713897	0.880731	1	3	0.000220962	9606	Homo sapiens	USP2		R-HSA-140978
R-HSA-391908	Prostanoid ligand receptors	1	14	0.00098101	0.713897	0.880731	1	8	0.000589232	9606	Homo sapiens	PTGER3		R-HSA-391933
R-HSA-198725	Nuclear Events (kinase and transcription factor activation)	6	80	0.00560577	0.718453	0.880731	25	48	0.00353539	9606	Homo sapiens	DUSP4;EGR1;FOS;TRIB1;ZNF225		R-HSA-9613202;R-HSA-9031624;R-HSA-9613207;R-HSA-9613210;R-HSA-9031616;R-HSA-9612483;R-HSA-203797;R-HSA-9621386;R-HSA-9621385;R-HSA-9031575;R-HSA-9612493;R-HSA-9621042;R-HSA-9620723;R-HSA-9620663;R-HSA-9621048;R-HSA-9612514;R-HSA-9613219;R-HSA-9612516;R-HSA-9621035;R-HSA-9621032;R-HSA-9612073;R-HSA-9616105;R-HSA-9616110;R-HSA-9616367;R-HSA-9612076
R-HSA-373760	L1CAM interactions	10	130	0.00910938	0.723452	0.880731	20	54	0.00397731	9606	Homo sapiens	DNM3;NFASC;CHL1;CNTN6;ITGA10;CNTN2;NRCAM;ITGA5;DNM1;SCN1B		R-HSA-443782;R-HSA-373733;R-HSA-376134;R-HSA-373729;R-HSA-445091;R-HSA-445088;R-HSA-373730;R-HSA-549060;R-HSA-445067;R-HSA-373739;R-HSA-373738;R-HSA-447030;R-HSA-555065;R-HSA-374672;R-HSA-443774;R-HSA-445087;R-HSA-374686;R-HSA-447034;R-HSA-445083;R-HSA-437243
R-HSA-422356	Regulation of insulin secretion	8	106	0.00742765	0.729202	0.880731	16	34	0.00250424	9606	Homo sapiens	SNAP25;MARCKS;KCNC2;GNG4;CACNA2D2;ACSL4;CD36;RAPGEF3		R-HSA-381668;R-HSA-400037;R-HSA-400097;R-HSA-400046;R-HSA-434382;R-HSA-265645;R-HSA-381612;R-HSA-265166;R-HSA-434381;R-HSA-399978;R-HSA-381706;R-HSA-381713;R-HSA-265682;R-HSA-422320;R-HSA-381727;R-HSA-400092
R-HSA-392451	G beta:gamma signalling through PI3Kgamma	2	29	0.00203209	0.731171	0.880731	3	4	0.000294616	9606	Homo sapiens	GNG4;PDK1		R-HSA-392295;R-HSA-392300;R-HSA-9603279
R-HSA-2024101	CS/DS degradation	2	29	0.00203209	0.731171	0.880731	3	10	0.00073654	9606	Homo sapiens	BGN;CSPG4		R-HSA-1793176;R-HSA-2022056;R-HSA-2065233
R-HSA-982772	Growth hormone receptor signaling	2	29	0.00203209	0.731171	0.880731	4	28	0.00206231	9606	Homo sapiens	LYN;STAT3		R-HSA-1168768;R-HSA-1168456;R-HSA-1168459;R-HSA-1168767
R-HSA-201681	TCF dependent signaling in response to WNT	17	216	0.0151356	0.732278	0.880731	44	71	0.00522943	9606	Homo sapiens	HIST1H2BJ;LEF1;LRP5;CXXC4;DKK2;PSMC4;HECW1;HIST1H2AD;PIP5K1B;HIST1H2BG;EMB;LGR5;SOX7;HIST1H3D;RSPO4;DACT1		R-HSA-3769401;R-HSA-4641159;R-HSA-3299569;R-HSA-3322422;R-HSA-4641155;R-HSA-3769392;R-HSA-3364026;R-HSA-3322427;R-HSA-3322424;R-HSA-3769397;R-HSA-201677;R-HSA-4641236;R-HSA-4411351;R-HSA-3769391;R-HSA-201685;R-HSA-5368582;R-HSA-1504193;R-HSA-4641246;R-HSA-201691;R-HSA-5368586;R-HSA-3364014;R-HSA-3640874;R-HSA-5665608;R-HSA-4411357;R-HSA-4641253;R-HSA-3361751;R-HSA-4411367;R-HSA-3451153;R-HSA-4641…
R-HSA-157858	Gap junction trafficking and regulation	4	56	0.00392404	0.735968	0.880731	18	24	0.0017677	9606	Homo sapiens	GJA1;GJA5;CLTCL1;DNM1		R-HSA-191072;R-HSA-191654;R-HSA-190662;R-HSA-190790;R-HSA-190788;R-HSA-191656;R-HSA-190541;R-HSA-190829;R-HSA-196017;R-HSA-190519;R-HSA-191636;R-HSA-190682;R-HSA-196026;R-HSA-190520;R-HSA-191737;R-HSA-190686;R-HSA-190782;R-HSA-190877
R-HSA-8853659	RET signaling	3	43	0.0030131	0.738213	0.880731	24	24	0.0017677	9606	Homo sapiens	RET;GRB7;GRB10		R-HSA-8853734;R-HSA-8854981;R-HSA-8855747;R-HSA-8853762;R-HSA-8855617;R-HSA-8853793;R-HSA-8853792;R-HSA-8853774;R-HSA-8855564;R-HSA-8855915;R-HSA-8853737;R-HSA-8853801;R-HSA-8853800;R-HSA-8855508;R-HSA-8854899;R-HSA-8854897;R-HSA-8853745;R-HSA-8853789;R-HSA-8854908;R-HSA-8853755;R-HSA-8871227;R-HSA-8871226;R-HSA-8853753;R-HSA-8854905
R-HSA-1368108	BMAL1:CLOCK,NPAS2 activates circadian gene expression	3	43	0.0030131	0.738213	0.880731	20	20	0.00147308	9606	Homo sapiens	SERPINE1;NPAS2		R-HSA-879724;R-HSA-5663127;R-HSA-5663156;R-HSA-5663124;R-HSA-5663122;R-HSA-8878702;R-HSA-5663132;R-HSA-879782;R-HSA-5663165;R-HSA-1368889;R-HSA-8878679;R-HSA-5663138;R-HSA-5663170;R-HSA-879770;R-HSA-5663105;R-HSA-549424;R-HSA-879798;R-HSA-549364;R-HSA-549428;R-HSA-879762
R-HSA-432720	Lysosome Vesicle Biogenesis	3	43	0.0030131	0.738213	0.880731	5	8	0.000589232	9606	Homo sapiens	VAMP8;CTSZ;AP1S3		R-HSA-432706;R-HSA-432707;R-HSA-432688;R-HSA-5333658;R-HSA-432712
R-HSA-9696273	RND1 GTPase cycle	3	43	0.0030131	0.738213	0.880731	1	2	0.000147308	9606	Homo sapiens	GRB7;EPSTI1;EPHA2		R-HSA-9696271
R-HSA-114604	GPVI-mediated activation cascade	3	43	0.0030131	0.738213	0.880731	8	25	0.00184135	9606	Homo sapiens	LYN;FYN;PDK1		R-HSA-139842;R-HSA-453200;R-HSA-437118;R-HSA-453183;R-HSA-114600;R-HSA-437195;R-HSA-2316429;R-HSA-437192
R-HSA-111933	Calmodulin induced events	3	43	0.0030131	0.738213	0.880731	6	23	0.00169404	9606	Homo sapiens	CAMK2B;PDE1B;ADCY2		R-HSA-111955;R-HSA-442725;R-HSA-111956;R-HSA-111930;R-HSA-9617583;R-HSA-444792
R-HSA-111997	CaM pathway	3	43	0.0030131	0.738213	0.880731	6	24	0.0017677	9606	Homo sapiens	CAMK2B;PDE1B;ADCY2		R-HSA-111955;R-HSA-442725;R-HSA-111956;R-HSA-111930;R-HSA-9617583;R-HSA-444792
R-HSA-1234158	Regulation of gene expression by Hypoxia-inducible Factor	1	15	0.00105108	0.738373	0.880731	7	7	0.000515578	9606	Homo sapiens	EPAS1		R-HSA-8932184;R-HSA-1234161;R-HSA-1234167;R-HSA-1235035;R-HSA-1234171;R-HSA-1235070;R-HSA-1235037
R-HSA-1250342	PI3K events in ERBB4 signaling	1	15	0.00105108	0.738373	0.880731	2	2	0.000147308	9606	Homo sapiens	NRG4		R-HSA-1250370;R-HSA-1250353
R-HSA-202670	ERKs are inactivated	1	15	0.00105108	0.738373	0.880731	1	2	0.000147308	9606	Homo sapiens	DUSP4		R-HSA-203797
R-HSA-418359	Reduction of cytosolic Ca++ levels	1	15	0.00105108	0.738373	0.880731	1	3	0.000220962	9606	Homo sapiens	ATP2B3		R-HSA-418309
R-HSA-5358493	Synthesis of diphthamide-EEF2	1	15	0.00105108	0.738373	0.880731	1	4	0.000294616	9606	Homo sapiens	DPH3		R-HSA-5358494
R-HSA-428540	Activation of RAC1	1	15	0.00105108	0.738373	0.880731	1	4	0.000294616	9606	Homo sapiens	PAK7		R-HSA-428531
R-HSA-9694719	Maturation of protein 3a	1	15	0.00105108	0.738373	0.880731	1	7	0.000515578	9606	Homo sapiens	ST6GAL1		R-HSA-9694718
R-HSA-9683673	Maturation of protein 3a	1	15	0.00105108	0.738373	0.880731	1	7	0.000515578	9606	Homo sapiens	ST6GAL1		R-HSA-9683769
R-HSA-111461	Cytochrome c-mediated apoptotic response	1	15	0.00105108	0.738373	0.880731	1	12	0.000883848	9606	Homo sapiens	UACA		R-HSA-6804652
R-HSA-1296071	Potassium Channels	8	107	0.00749772	0.738453	0.880731	6	19	0.00139943	9606	Homo sapiens	KCNG1;KCND2;KCNC2;GNG4;KCNC3;KCNA4;ABCC9;KCNK3		R-HSA-1013020;R-HSA-1299318;R-HSA-1013013;R-HSA-1013012;R-HSA-1296127;R-HSA-1369017
R-HSA-418592	ADP signalling through P2Y purinoceptor 1	2	30	0.00210217	0.74806	0.880731	4	7	0.000515578	9606	Homo sapiens	GNG4;PLA2G4A		R-HSA-418581;R-HSA-418579;R-HSA-418576;R-HSA-428961
R-HSA-933542	TRAF6 mediated NF-kB activation	2	30	0.00210217	0.74806	0.880731	2	4	0.000294616	9606	Homo sapiens	BCAM;NFKBIB		R-HSA-168166;R-HSA-168140
R-HSA-9665686	Signaling by ERBB2 TMD/JMD mutants	2	30	0.00210217	0.74806	0.880731	6	13	0.000957502	9606	Homo sapiens	ERBB3;NRG4		R-HSA-9665699;R-HSA-9665697;R-HSA-9665701;R-HSA-9665700;R-HSA-9665705;R-HSA-9665709
R-HSA-5621575	CD209 (DC-SIGN) signaling	2	30	0.00210217	0.74806	0.880731	1	11	0.000810194	9606	Homo sapiens	LYN;FYN		R-HSA-5624486
R-HSA-5218920	VEGFR2 mediated vascular permeability	3	44	0.00308318	0.75207	0.880731	11	15	0.00110481	9606	Homo sapiens	NOS3;TRIB1;PDK1		R-HSA-2317314;R-HSA-202129;R-HSA-202144;R-HSA-198640;R-HSA-202137;R-HSA-202111;R-HSA-202127;R-HSA-198270;R-HSA-202110;R-HSA-2316429;R-HSA-1497784
R-HSA-3769402	Deactivation of the beta-catenin transactivating complex	3	44	0.00308318	0.75207	0.880731	6	14	0.00103116	9606	Homo sapiens	LEF1;EMB;SOX7		R-HSA-3361751;R-HSA-3769391;R-HSA-3769392;R-HSA-3364042;R-HSA-5665608;R-HSA-5626938
R-HSA-2024096	HS-GAG degradation	3	44	0.00308318	0.75207	0.880731	4	14	0.00103116	9606	Homo sapiens	GAL;SDC2;GPC4		R-HSA-2090079;R-HSA-1667005;R-HSA-2024084;R-HSA-1678694
R-HSA-381340	Transcriptional regulation of white adipocyte differentiation	8	109	0.00763787	0.756294	0.880731	14	18	0.00132577	9606	Homo sapiens	CEBPD;MED30;LPL;CD36;MED29		R-HSA-1183058;R-HSA-560491;R-HSA-381377;R-HSA-560493;R-HSA-381283;R-HSA-1183003;R-HSA-560517;R-HSA-560472;R-HSA-560473;R-HSA-560510;R-HSA-381309;R-HSA-977271;R-HSA-560498;R-HSA-977392
R-HSA-9027276	Erythropoietin activates Phosphoinositide-3-kinase (PI3K)	1	16	0.00112115	0.760757	0.880731	7	7	0.000515578	9606	Homo sapiens	LYN		R-HSA-9027273;R-HSA-9027272;R-HSA-9021627;R-HSA-9027275;R-HSA-9027281;R-HSA-9012657;R-HSA-9027280
R-HSA-937039	IRAK1 recruits IKK complex	1	16	0.00112115	0.760757	0.880731	3	4	0.000294616	9606	Homo sapiens	PELI1		R-HSA-937050;R-HSA-937034;R-HSA-937044
R-HSA-975144	IRAK1 recruits IKK complex upon TLR7/8 or 9 stimulation	1	16	0.00112115	0.760757	0.880731	3	4	0.000294616	9606	Homo sapiens	PELI1		R-HSA-975142;R-HSA-975122;R-HSA-975139
R-HSA-4641265	Repression of WNT target genes	1	16	0.00112115	0.760757	0.880731	4	7	0.000515578	9606	Homo sapiens	LEF1		R-HSA-8944349;R-HSA-8944352;R-HSA-4641231;R-HSA-5229348
R-HSA-1358803	Downregulation of ERBB2:ERBB3 signaling	1	16	0.00112115	0.760757	0.880731	4	8	0.000589232	9606	Homo sapiens	ERBB3		R-HSA-1358790;R-HSA-1358801;R-HSA-1358798;R-HSA-1358792
R-HSA-879415	Advanced glycosylation endproduct receptor signaling	1	16	0.00112115	0.760757	0.880731	2	4	0.000294616	9606	Homo sapiens	BCAM		R-HSA-879411;R-HSA-879362
R-HSA-8983432	Interleukin-15 signaling	1	16	0.00112115	0.760757	0.880731	5	17	0.00125212	9606	Homo sapiens	STAT3		R-HSA-8983371;R-HSA-8983373;R-HSA-8983374;R-HSA-8983379;R-HSA-8983378
R-HSA-9640463	Wax biosynthesis	1	16	0.00112115	0.760757	0.880731	1	6	0.000441924	9606	Homo sapiens	FAR2		R-HSA-390438
R-HSA-5661231	Metallothioneins bind metals	1	16	0.00112115	0.760757	0.880731	2	27	0.00198866	9606	Homo sapiens	MT1E		R-HSA-5662614;R-HSA-5662595
R-HSA-389887	Beta-oxidation of pristanoyl-CoA	2	31	0.00217224	0.764029	0.880731	2	11	0.000810194	9606	Homo sapiens	ACOX2;CROT		R-HSA-389889;R-HSA-390281
R-HSA-193775	Synthesis of bile acids and bile salts via 24-hydroxycholesterol	3	45	0.00315325	0.765332	0.880731	3	28	0.00206231	9606	Homo sapiens	AKR1C1;PPIL3		R-HSA-193781;R-HSA-193758;R-HSA-193789
R-HSA-174824	Plasma lipoprotein assembly, remodeling, and clearance	7	98	0.00686707	0.77097	0.880731	11	85	0.00626059	9606	Homo sapiens	SCARB1;ALB;LIPG;LPL;PCSK6;CES3;MBTPS2		R-HSA-349637;R-HSA-349638;R-HSA-6784628;R-HSA-264679;R-HSA-6784676;R-HSA-174757;R-HSA-8937442;R-HSA-6784861;R-HSA-6784620;R-HSA-8980228;R-HSA-8857928
R-HSA-9013409	RHOJ GTPase cycle	4	59	0.00413426	0.771588	0.880731	3	3	0.000220962	9606	Homo sapiens	GJA1;RHOJ;ARHGAP1;MPP7		R-HSA-9017488;R-HSA-9017507;R-HSA-9017491
R-HSA-975576	N-glycan antennae elongation in the medial/trans-Golgi	3	46	0.00322332	0.77801	0.880731	3	14	0.00103116	9606	Homo sapiens	ST6GAL1;FUCA1;KCTD15		R-HSA-975902;R-HSA-6786034;R-HSA-5693807
R-HSA-525793	Myogenesis	2	32	0.00224231	0.779112	0.880731	10	14	0.00103116	9606	Homo sapiens	BOC;CTNNA2		R-HSA-376117;R-HSA-375141;R-HSA-448951;R-HSA-375140;R-HSA-376119;R-HSA-449200;R-HSA-375138;R-HSA-448958;R-HSA-448957;R-HSA-376121
R-HSA-400042	Adrenaline,noradrenaline inhibits insulin secretion	2	32	0.00224231	0.779112	0.880731	4	6	0.000441924	9606	Homo sapiens	GNG4;CACNA2D2		R-HSA-400037;R-HSA-400097;R-HSA-400046;R-HSA-400092
R-HSA-5357769	Caspase activation via extrinsic apoptotic signalling pathway	2	32	0.00224231	0.779112	0.880731	6	17	0.00125212	9606	Homo sapiens	UNC5B;TNFRSF10B		R-HSA-418852;R-HSA-139952;R-HSA-141156;R-HSA-418849;R-HSA-3465448;R-HSA-3371359
R-HSA-2046105	Linoleic acid (LA) metabolism	2	32	0.00224231	0.779112	0.880731	3	10	0.00073654	9606	Homo sapiens	ELOVL2		R-HSA-2046095;R-HSA-2046094;R-HSA-2046083
R-HSA-9022699	MECP2 regulates neuronal receptors and channels	2	32	0.00224231	0.779112	0.880731	2	26	0.001915	9606	Homo sapiens	GRIN2A		R-HSA-9006507;R-HSA-9006490
R-HSA-389359	CD28 dependent Vav1 pathway	1	17	0.00119123	0.781227	0.880731	5	6	0.000441924	9606	Homo sapiens	FYN		R-HSA-389348;R-HSA-389350;R-HSA-388814;R-HSA-389352;R-HSA-389354
R-HSA-1663150	The activation of arylsulfatases	1	17	0.00119123	0.781227	0.880731	1	2	0.000147308	9606	Homo sapiens	ARSG		R-HSA-1614362
R-HSA-5576893	Phase 2 - plateau phase	1	17	0.00119123	0.781227	0.880731	1	2	0.000147308	9606	Homo sapiens	CACNA2D2		R-HSA-5577213
R-HSA-6811555	PI5P Regulates TP53 Acetylation	1	17	0.00119123	0.781227	0.880731	3	8	0.000589232	9606	Homo sapiens	PIP4K2A		R-HSA-6811522;R-HSA-8877692;R-HSA-8877691
R-HSA-8963901	Chylomicron remodeling	1	17	0.00119123	0.781227	0.880731	1	3	0.000220962	9606	Homo sapiens	LPL		R-HSA-174757
R-HSA-1059683	Interleukin-6 signaling	1	17	0.00119123	0.781227	0.880731	6	20	0.00147308	9606	Homo sapiens	STAT3		R-HSA-1112565;R-HSA-1112727;R-HSA-1112602;R-HSA-1112538;R-HSA-1112587;R-HSA-1112604
R-HSA-381033	ATF6 (ATF6-alpha) activates chaperones	1	17	0.00119123	0.781227	0.880731	1	10	0.00073654	9606	Homo sapiens	MBTPS2		R-HSA-420818
R-HSA-4085001	Sialic acid metabolism	4	60	0.00420433	0.782588	0.880731	4	21	0.00154673	9606	Homo sapiens	ST6GAL1;GAL;ST8SIA1;ST8SIA4		R-HSA-4085033;R-HSA-4084999;R-HSA-9638120;R-HSA-4084978
R-HSA-5576891	Cardiac conduction	10	138	0.00966996	0.786483	0.880731	9	27	0.00198866	9606	Homo sapiens	CAMK2B;KCND2;NPR2;CACNA2D2;ATP2B3;ABCC9;FGF12;SCN1B;KCNK3;RYR3		R-HSA-427910;R-HSA-418309;R-HSA-5678261;R-HSA-5577234;R-HSA-2855020;R-HSA-5577213;R-HSA-5576895;R-HSA-5578910;R-HSA-5692408
R-HSA-9013423	RAC3 GTPase cycle	7	100	0.00700722	0.78812	0.880731	3	6	0.000441924	9606	Homo sapiens	ABI2;SLITRK3;ARHGDIB;ARHGAP1;SLITRK5;MPP7;EPHA2		R-HSA-9018808;R-HSA-9018807;R-HSA-9018806
R-HSA-9006115	Signaling by NTRK2 (TRKB)	2	33	0.00231238	0.793342	0.880731	7	38	0.00279885	9606	Homo sapiens	DOCK3;FYN		R-HSA-9032601;R-HSA-9032761;R-HSA-9032798;R-HSA-9037040;R-HSA-9032532;R-HSA-9032582;R-HSA-9032502
R-HSA-8866652	Synthesis of active ubiquitin: roles of E1 and E2 enzymes	2	33	0.00231238	0.793342	0.880731	2	16	0.00117846	9606	Homo sapiens	UBE2H;UBE2E1;UBE2E2		R-HSA-8852130;R-HSA-8852129
R-HSA-6803204	TP53 Regulates Transcription of Genes Involved in Cytochrome C Release	2	33	0.00231238	0.793342	0.880731	2	25	0.00184135	9606	Homo sapiens	TP53INP1		R-HSA-6799418;R-HSA-6799416
R-HSA-9701898	STAT3 nuclear events downstream of ALK signaling	1	18	0.0012613	0.799947	0.880731	10	10	0.00073654	9606	Homo sapiens	STAT3		R-HSA-9701556;R-HSA-9701557;R-HSA-9701537;R-HSA-9701569;R-HSA-9701548;R-HSA-9701549;R-HSA-9701565;R-HSA-9701534;R-HSA-9701562;R-HSA-9701531
R-HSA-399956	CRMPs in Sema3A signaling	1	18	0.0012613	0.799947	0.880731	5	5	0.00036827	9606	Homo sapiens	FYN		R-HSA-399951;R-HSA-399946;R-HSA-399947;R-HSA-399931;R-HSA-399944
R-HSA-975163	IRAK2 mediated activation of TAK1 complex upon TLR7/8 or 9 stimulation	1	18	0.0012613	0.799947	0.880731	5	5	0.00036827	9606	Homo sapiens	IRAK2		R-HSA-450358;R-HSA-975103;R-HSA-975147;R-HSA-975097;R-HSA-975185
R-HSA-9708530	Regulation of BACH1 activity	1	18	0.0012613	0.799947	0.880731	2	7	0.000515578	9606	Homo sapiens	MAFK		R-HSA-9708557;R-HSA-9707690
R-HSA-418457	cGMP effects	1	18	0.0012613	0.799947	0.880731	1	4	0.000294616	9606	Homo sapiens	PDE1B		R-HSA-418456
R-HSA-391160	Signal regulatory protein family interactions	1	18	0.0012613	0.799947	0.880731	1	10	0.00073654	9606	Homo sapiens	FYB		R-HSA-391151
R-HSA-1482798	Acyl chain remodeling of CL	1	18	0.0012613	0.799947	0.880731	1	12	0.000883848	9606	Homo sapiens	PLA2G4A		R-HSA-1482759
R-HSA-435354	Zinc transporters	1	18	0.0012613	0.799947	0.880731	1	13	0.000957502	9606	Homo sapiens	SLC39A8		R-HSA-442387
R-HSA-9607240	FLT3 Signaling	3	48	0.00336346	0.801674	0.880731	6	43	0.00316712	9606	Homo sapiens	HCK;GRB10;FYN		R-HSA-9706340;R-HSA-9706308;R-HSA-9609274;R-HSA-9605259;R-HSA-9706344;R-HSA-9706345
R-HSA-1221632	Meiotic synapsis	4	62	0.00434447	0.803319	0.880731	4	6	0.000441924	9606	Homo sapiens	HIST1H2BJ;HIST1H2AD;HIST1H2BG		R-HSA-912408;R-HSA-912470;R-HSA-912467;R-HSA-912450
R-HSA-68867	Assembly of the pre-replicative complex	7	102	0.00714736	0.804288	0.880731	12	18	0.00132577	9606	Homo sapiens	HIST1H2BJ;PSMC4;ORC2;HIST1H2AD;HIST1H2BG;HIST1H3D		R-HSA-68849;R-HSA-68688;R-HSA-68611;R-HSA-68595;R-HSA-68610;R-HSA-68615;R-HSA-68825;R-HSA-9749197;R-HSA-68603;R-HSA-68826;R-HSA-9749098;R-HSA-176973
R-HSA-166520	Signaling by NTRKs	12	166	0.011632	0.805329	0.880731	35	164	0.0120793	9606	Homo sapiens	DNM3;DUSP4;EGR1;DOCK3;STAT3;FYN;FOS;TRIB1;ZNF225;PCSK6;DNM1		R-HSA-9613202;R-HSA-9031624;R-HSA-9613207;R-HSA-9613210;R-HSA-9031616;R-HSA-187020;R-HSA-198732;R-HSA-9032582;R-HSA-9032601;R-HSA-9612483;R-HSA-203797;R-HSA-9032798;R-HSA-9621386;R-HSA-9621385;R-HSA-9032532;R-HSA-9031575;R-HSA-177501;R-HSA-9612493;R-HSA-9621042;R-HSA-9620723;R-HSA-9620663;R-HSA-9621048;R-HSA-9032761;R-HSA-9612514;R-HSA-9613219;R-HSA-9612516;R-HSA-9621035;R-HSA-9037040;R-HSA-96210…
R-HSA-380994	ATF4 activates genes in response to endoplasmic reticulum stress	2	34	0.00238245	0.806756	0.880731	1	7	0.000515578	9606	Homo sapiens	ATF3		R-HSA-1791173
R-HSA-9018519	Estrogen-dependent gene expression	11	154	0.0107911	0.809212	0.880731	26	66	0.00486116	9606	Homo sapiens	HIST1H2BJ;MYB;HIST1H2AD;HIST1H2BG;FOS;CXXC5;HIST1H3D;RUNX1		R-HSA-9011981;R-HSA-8931981;R-HSA-9011983;R-HSA-8932033;R-HSA-9011971;R-HSA-8932037;R-HSA-9011975;R-HSA-9009371;R-HSA-9012315;R-HSA-9012319;R-HSA-9018334;R-HSA-9011985;R-HSA-9011984;R-HSA-9018325;R-HSA-9009065;R-HSA-8932076;R-HSA-9011949;R-HSA-9011950;R-HSA-9012000;R-HSA-9009378;R-HSA-9011941;R-HSA-9011966;R-HSA-9011952;R-HSA-8932084;R-HSA-8932020;R-HSA-8932021
R-HSA-5675221	Negative regulation of MAPK pathway	3	49	0.00343354	0.81269	0.880731	2	17	0.00125212	9606	Homo sapiens	DUSP4;DUSP5;DUSP9		R-HSA-5675376;R-HSA-5675373
R-HSA-73929	Base-Excision Repair, AP Site Formation	4	63	0.00441455	0.813068	0.880731	6	64	0.00471385	9606	Homo sapiens	HIST1H2BJ;HIST1H2AD;HIST1H2BG		R-HSA-9629216;R-HSA-9629483;R-HSA-9629195;R-HSA-9629497;R-HSA-9629372;R-HSA-9629373
R-HSA-9027284	Erythropoietin activates RAS	1	19	0.00133137	0.817066	0.880731	8	8	0.000589232	9606	Homo sapiens	LYN		R-HSA-9027274;R-HSA-9029149;R-HSA-9029151;R-HSA-9029150;R-HSA-9029155;R-HSA-9024723;R-HSA-9029158;R-HSA-9024726
R-HSA-2173791	TGF-beta receptor signaling in EMT (epithelial to mesenchymal transition)	1	19	0.00133137	0.817066	0.880731	6	6	0.000441924	9606	Homo sapiens	F11R		R-HSA-2160931;R-HSA-2160932;R-HSA-2134532;R-HSA-2160935;R-HSA-2134519;R-HSA-2134506
R-HSA-8964315	G beta:gamma signalling through BTK	1	19	0.00133137	0.817066	0.880731	3	3	0.000220962	9606	Homo sapiens	GNG4		R-HSA-8964317;R-HSA-8964271;R-HSA-8964241
R-HSA-418885	DCC mediated attractive signaling	1	19	0.00133137	0.817066	0.880731	8	12	0.000883848	9606	Homo sapiens	FYN		R-HSA-373716;R-HSA-418868;R-HSA-418850;R-HSA-418865;R-HSA-374701;R-HSA-418874;R-HSA-418858;R-HSA-418856
R-HSA-399954	Sema3A PAK dependent Axon repulsion	1	19	0.00133137	0.817066	0.880731	3	6	0.000441924	9606	Homo sapiens	FYN		R-HSA-399939;R-HSA-399952;R-HSA-399930
R-HSA-1810476	RIP-mediated NFkB activation via ZBP1	1	19	0.00133137	0.817066	0.880731	1	4	0.000294616	9606	Homo sapiens	NFKBIB		R-HSA-168140
R-HSA-937072	TRAF6-mediated induction of TAK1 complex within TLR4 complex	1	19	0.00133137	0.817066	0.880731	1	6	0.000441924	9606	Homo sapiens	IRAK2		R-HSA-450358
R-HSA-975577	N-Glycan antennae elongation	1	19	0.00133137	0.817066	0.880731	1	6	0.000441924	9606	Homo sapiens	ST6GAL1		R-HSA-975902
R-HSA-9673770	Signaling by PDGFRA extracellular domain mutants	1	19	0.00133137	0.817066	0.880731	1	7	0.000515578	9606	Homo sapiens	STAT3		R-HSA-9672159
R-HSA-9673767	Signaling by PDGFRA transmembrane, juxtamembrane and kinase domain mutants	1	19	0.00133137	0.817066	0.880731	1	7	0.000515578	9606	Homo sapiens	STAT3		R-HSA-9672176
R-HSA-5676934	Protein repair	1	19	0.00133137	0.817066	0.880731	1	7	0.000515578	9606	Homo sapiens	MSRA		R-HSA-5676940
R-HSA-8876725	Protein methylation	1	19	0.00133137	0.817066	0.880731	1	9	0.000662886	9606	Homo sapiens	EEF1A2		R-HSA-8931974
R-HSA-9664565	Signaling by ERBB2 KD Mutants	2	35	0.00245253	0.819388	0.880731	8	17	0.00125212	9606	Homo sapiens	ERBB3;NRG4		R-HSA-9664976;R-HSA-9664567;R-HSA-9664983;R-HSA-9664950;R-HSA-9664646;R-HSA-9664664;R-HSA-9664991;R-HSA-9664588
R-HSA-450282	MAPK targets/ Nuclear events mediated by MAP kinases	2	35	0.00245253	0.819388	0.880731	3	16	0.00117846	9606	Homo sapiens	DUSP4;FOS		R-HSA-450292;R-HSA-450325;R-HSA-203797
R-HSA-1592389	Activation of Matrix Metalloproteinases	2	35	0.00245253	0.819388	0.880731	4	27	0.00198866	9606	Homo sapiens	MMP11;CTSO		R-HSA-1592297;R-HSA-1592362;R-HSA-1604752;R-HSA-1602484
R-HSA-983231	Factors involved in megakaryocyte development and platelet production	14	194	0.013594	0.82196	0.880731	18	43	0.00316712	9606	Homo sapiens	DOCK3;GATA6;CABLES1;LRRC16A;DOCK11;EHD2;KLC3;EHD3;IRF1;MYB;MAFK;RAB5A;HIST1H3D		R-HSA-997263;R-HSA-1011598;R-HSA-1013833;R-HSA-1008200;R-HSA-994148;R-HSA-994020;R-HSA-983266;R-HSA-1008220;R-HSA-983259;R-HSA-983194;R-HSA-994106;R-HSA-1013881;R-HSA-992696;R-HSA-1011576;R-HSA-996755;R-HSA-994034;R-HSA-1008240;R-HSA-1011600
R-HSA-5578775	Ion homeostasis	4	64	0.00448462	0.822417	0.880731	4	16	0.00117846	9606	Homo sapiens	CAMK2B;ATP2B3;ABCC9;RYR3		R-HSA-427910;R-HSA-418309;R-HSA-5678261;R-HSA-2855020
R-HSA-381676	Glucagon-like Peptide-1 (GLP1) regulates insulin secretion	3	50	0.00350361	0.823183	0.880731	6	11	0.000810194	9606	Homo sapiens	KCNC2;GNG4;RAPGEF3		R-HSA-381668;R-HSA-381713;R-HSA-422320;R-HSA-381612;R-HSA-381727;R-HSA-381706
R-HSA-165159	MTOR signalling	3	50	0.00350361	0.823183	0.880731	6	29	0.00213597	9606	Homo sapiens	CAB39L;STRADB;PRKAG2		R-HSA-380949;R-HSA-447074;R-HSA-200421;R-HSA-380930;R-HSA-380927;R-HSA-380942
R-HSA-512988	Interleukin-3, Interleukin-5 and GM-CSF signaling	3	50	0.00350361	0.823183	0.880731	3	38	0.00279885	9606	Homo sapiens	LYN;HCK;FYN		R-HSA-879917;R-HSA-912629;R-HSA-912627
R-HSA-9013408	RHOG GTPase cycle	5	78	0.00546563	0.824883	0.880731	3	6	0.000441924	9606	Homo sapiens	DOCK3;ARHGDIB;ARHGAP1;MPP7;EPHA2		R-HSA-9014456;R-HSA-9014449;R-HSA-9014434
R-HSA-193368	Synthesis of bile acids and bile salts via 7alpha-hydroxycholesterol	5	78	0.00546563	0.824883	0.880731	6	39	0.0028725	9606	Homo sapiens	ACOX2;AKR1C1;CYP7B1;PPIL3		R-HSA-192051;R-HSA-192160;R-HSA-192097;R-HSA-192036;R-HSA-193369;R-HSA-192335
R-HSA-1630316	Glycosaminoglycan metabolism	13	182	0.0127531	0.825222	0.880731	41	88	0.00648155	9606	Homo sapiens	CSGALNACT1;HS3ST3B1;CHST9;GAL;B3GNT7;SDC2;BGN;CHST1;CSPG4;GPC4;HS3ST1;CHST3		R-HSA-2076383;R-HSA-2090079;R-HSA-2046175;R-HSA-1971487;R-HSA-2076508;R-HSA-1793176;R-HSA-1971482;R-HSA-1971483;R-HSA-2024084;R-HSA-2076371;R-HSA-2065233;R-HSA-2022860;R-HSA-2022856;R-HSA-2022919;R-HSA-2076419;R-HSA-2076611;R-HSA-2022851;R-HSA-1889981;R-HSA-2022911;R-HSA-2025724;R-HSA-9638064;R-HSA-1667005;R-HSA-2018682;R-HSA-1889978;R-HSA-1878002;R-HSA-2022065;R-HSA-9632034;R-HSA-2022063;R-HSA-2…
R-HSA-8939211	ESR-mediated signaling	19	257	0.0180085	0.825551	0.880731	54	111	0.00817559	9606	Homo sapiens	HIST1H2BJ;NOS3;FOS;CXXC5;ESR2;RUNX1;GNG4;GNAT3;MYB;HIST1H2AD;S1PR3;HIST1H2BG;EMB;HIST1H3D;PDK1		R-HSA-9011981;R-HSA-9632918;R-HSA-8931981;R-HSA-9021068;R-HSA-9011983;R-HSA-9633044;R-HSA-9011971;R-HSA-202127;R-HSA-9011975;R-HSA-9021596;R-HSA-9625479;R-HSA-9011985;R-HSA-9632906;R-HSA-9011984;R-HSA-9021072;R-HSA-9632910;R-HSA-9021079;R-HSA-9009065;R-HSA-9021609;R-HSA-9632182;R-HSA-9021601;R-HSA-9012000;R-HSA-9021600;R-HSA-8932020;R-HSA-8932021;R-HSA-9624272;R-HSA-9038029;R-HSA-9625813;R-HSA-96…
R-HSA-168188	Toll Like Receptor TLR6:TLR2 Cascade	8	118	0.00826852	0.825837	0.880731	35	66	0.00486116	9606	Homo sapiens	DUSP4;BCAM;IRAK2;FGG;PELI1;FOS;CD36;NFKBIB		R-HSA-166082;R-HSA-937034;R-HSA-2201316;R-HSA-166091;R-HSA-2201322;R-HSA-166286;R-HSA-936963;R-HSA-166284;R-HSA-936960;R-HSA-168140;R-HSA-2559464;R-HSA-2559414;R-HSA-936991;R-HSA-450325;R-HSA-937050;R-HSA-936986;R-HSA-2262775;R-HSA-203797;R-HSA-166362;R-HSA-166363;R-HSA-9630923;R-HSA-937044;R-HSA-2262777;R-HSA-936942;R-HSA-168166;R-HSA-166119;R-HSA-450337;R-HSA-450346;R-HSA-937059;R-HSA-937022;R-…
R-HSA-166058	MyD88:MAL(TIRAP) cascade initiated on plasma membrane	8	118	0.00826852	0.825837	0.880731	33	64	0.00471385	9606	Homo sapiens	DUSP4;BCAM;IRAK2;FGG;PELI1;FOS;CD36;NFKBIB		R-HSA-166082;R-HSA-937034;R-HSA-2201316;R-HSA-166091;R-HSA-2201322;R-HSA-166286;R-HSA-936963;R-HSA-166284;R-HSA-936960;R-HSA-168140;R-HSA-2559414;R-HSA-936991;R-HSA-450325;R-HSA-937050;R-HSA-936986;R-HSA-2262775;R-HSA-203797;R-HSA-166362;R-HSA-166363;R-HSA-9630923;R-HSA-937044;R-HSA-2262777;R-HSA-936942;R-HSA-168166;R-HSA-166119;R-HSA-450337;R-HSA-450346;R-HSA-937059;R-HSA-937022;R-HSA-450292;R-H…
R-HSA-8878159	Transcriptional regulation by RUNX3	8	118	0.00826852	0.825837	0.880731	13	47	0.00346174	9606	Homo sapiens	HDAC4;PSMC4;LEF1;SPP1;RUNX1		R-HSA-4411367;R-HSA-8951428;R-HSA-8952101;R-HSA-8952069;R-HSA-8951910;R-HSA-8952408;R-HSA-8952442;R-HSA-8952062;R-HSA-8952081;R-HSA-8951442;R-HSA-8951443;R-HSA-4411357;R-HSA-8951926
R-HSA-5632684	Hedgehog 'on' state	6	92	0.00644664	0.828927	0.880731	12	37	0.0027252	9606	Homo sapiens	PSMC4;PTCH1;BOC;GAS1		R-HSA-5632677;R-HSA-5632646;R-HSA-5632653;R-HSA-5632668;R-HSA-5632652;R-HSA-5635868;R-HSA-5635854;R-HSA-5632649;R-HSA-5635865;R-HSA-5632648;R-HSA-5635848;R-HSA-5635850
R-HSA-9013404	RAC2 GTPase cycle	6	92	0.00644664	0.828927	0.880731	3	10	0.00073654	9606	Homo sapiens	DOCK3;ABI2;ARHGAP1;SLITRK5;MPP7;EPHA2		R-HSA-9014296;R-HSA-9014295;R-HSA-9014294
R-HSA-456926	Thrombin signalling through proteinase activated receptors (PARs)	2	36	0.0025226	0.831275	0.880731	14	15	0.00110481	9606	Homo sapiens	GNG4;F2R		R-HSA-396996;R-HSA-397891;R-HSA-418176;R-HSA-418158;R-HSA-396941;R-HSA-397835;R-HSA-418091;R-HSA-9708859;R-HSA-418163;R-HSA-114552;R-HSA-418172;R-HSA-418170;R-HSA-418200;R-HSA-114558
R-HSA-1250196	SHC1 events in ERBB2 signaling	2	36	0.0025226	0.831275	0.880731	4	6	0.000441924	9606	Homo sapiens	ERBB3;NRG4		R-HSA-1250195;R-HSA-1250486;R-HSA-1963578;R-HSA-1250463
R-HSA-2424491	DAP12 signaling	2	36	0.0025226	0.831275	0.880731	10	17	0.00125212	9606	Homo sapiens	FYN;KLRD1		R-HSA-2395412;R-HSA-2424484;R-HSA-210289;R-HSA-2424486;R-HSA-2424487;R-HSA-2424480;R-HSA-2396594;R-HSA-2424482;R-HSA-2395439;R-HSA-2395801
R-HSA-8863795	Downregulation of ERBB2 signaling	2	36	0.0025226	0.831275	0.880731	6	14	0.00103116	9606	Homo sapiens	ERBB3;NRG4		R-HSA-1358790;R-HSA-1358801;R-HSA-1963563;R-HSA-1358798;R-HSA-8863804;R-HSA-1358792
R-HSA-9008059	Interleukin-37 signaling	2	36	0.0025226	0.831275	0.880731	4	14	0.00103116	9606	Homo sapiens	STAT3;CASP1		R-HSA-9012556;R-HSA-9012542;R-HSA-9012689;R-HSA-9009072
R-HSA-1227990	Signaling by ERBB2 in Cancer	2	36	0.0025226	0.831275	0.880731	14	62	0.00456655	9606	Homo sapiens	ERBB3;NRG4		R-HSA-9664976;R-HSA-9664567;R-HSA-9664983;R-HSA-9664950;R-HSA-9664664;R-HSA-9664991;R-HSA-9665699;R-HSA-9665697;R-HSA-9664646;R-HSA-9665701;R-HSA-9665700;R-HSA-9665705;R-HSA-9665709;R-HSA-9664588
R-HSA-5686938	Regulation of TLR by endogenous ligand	2	36	0.0025226	0.831275	0.880731	2	12	0.000883848	9606	Homo sapiens	FGG;CD36		R-HSA-8870678;R-HSA-8869667
R-HSA-5223345	Miscellaneous transport and binding events	2	36	0.0025226	0.831275	0.880731	2	13	0.000957502	9606	Homo sapiens	NIPAL2;LRRC8C		R-HSA-5336453;R-HSA-8941543
R-HSA-163685	Integration of energy metabolism	10	145	0.0101605	0.832519	0.880731	22	62	0.00456655	9606	Homo sapiens	SNAP25;MARCKS;KCNC2;GNG4;PRKAG2;CACNA2D2;ACSL4;ADCY2;CD36;RAPGEF3		R-HSA-381668;R-HSA-163617;R-HSA-400037;R-HSA-400097;R-HSA-400046;R-HSA-434382;R-HSA-163691;R-HSA-265645;R-HSA-381612;R-HSA-265166;R-HSA-434381;R-HSA-399978;R-HSA-381706;R-HSA-163664;R-HSA-825631;R-HSA-381713;R-HSA-164151;R-HSA-265682;R-HSA-422320;R-HSA-381727;R-HSA-400092;R-HSA-164377
R-HSA-176412	Phosphorylation of the APC/C	1	20	0.00140144	0.832721	0.880731	2	2	0.000147308	9606	Homo sapiens	UBE2E1		R-HSA-174119;R-HSA-174132
R-HSA-354194	GRB2:SOS provides linkage to MAPK signaling for Integrins	1	20	0.00140144	0.832721	0.880731	2	2	0.000147308	9606	Homo sapiens	FGG		R-HSA-354165;R-HSA-354087
R-HSA-9687136	Aberrant regulation of mitotic exit in cancer due to RB1 defects	1	20	0.00140144	0.832721	0.880731	1	1	7.3654e-05	9606	Homo sapiens	UBE2E1		R-HSA-9687377
R-HSA-399955	SEMA3A-Plexin repulsion signaling by inhibiting Integrin adhesion	1	20	0.00140144	0.832721	0.880731	6	8	0.000589232	9606	Homo sapiens	FYN		R-HSA-399942;R-HSA-399941;R-HSA-399934;R-HSA-399935;R-HSA-399933;R-HSA-399928
R-HSA-9603798	Class I peroxisomal membrane protein import	1	20	0.00140144	0.832721	0.880731	3	6	0.000441924	9606	Homo sapiens	PAF1		R-HSA-9603784;R-HSA-9603775;R-HSA-9603804
R-HSA-5576886	Phase 4 - resting membrane potential	1	20	0.00140144	0.832721	0.880731	1	2	0.000147308	9606	Homo sapiens	KCNK3		R-HSA-5578910
R-HSA-140534	Caspase activation via Death Receptors in the presence of ligand	1	20	0.00140144	0.832721	0.880731	4	9	0.000662886	9606	Homo sapiens	TNFRSF10B		R-HSA-139952;R-HSA-141156;R-HSA-3465448;R-HSA-3371359
R-HSA-70350	Fructose catabolism	1	20	0.00140144	0.832721	0.880731	1	5	0.00036827	9606	Homo sapiens	ALDH1A1		R-HSA-6813749
R-HSA-399997	Acetylcholine regulates insulin secretion	1	20	0.00140144	0.832721	0.880731	1	7	0.000515578	9606	Homo sapiens	MARCKS		R-HSA-399978
R-HSA-5687128	MAPK6/MAPK4 signaling	7	106	0.00742765	0.833764	0.880731	13	40	0.00294616	9606	Homo sapiens	PSMC4;EMB;ETV4;MAPK4;RAG1		R-HSA-5687094;R-HSA-5687091;R-HSA-5687120;R-HSA-5692785;R-HSA-5692794;R-HSA-5687099;R-HSA-5687097;R-HSA-5687079;R-HSA-5687109;R-HSA-5687107;R-HSA-5687105;R-HSA-5687086;R-HSA-5687112
R-HSA-427413	NoRC negatively regulates rRNA expression	5	80	0.00560577	0.840788	0.880731	3	7	0.000515578	9606	Homo sapiens	HIST1H2BJ;HIST1H2AD;HIST1H2BG;HIST1H3D		R-HSA-5227490;R-HSA-433672;R-HSA-427337
R-HSA-5250913	Positive epigenetic regulation of rRNA expression	5	80	0.00560577	0.840788	0.880731	3	7	0.000515578	9606	Homo sapiens	HIST1H2BJ;HIST1H2AD;HIST1H2BG;HIST1H3D		R-HSA-427383;R-HSA-5250938;R-HSA-427336
R-HSA-399719	Trafficking of AMPA receptors	2	37	0.00259267	0.842452	0.880731	4	4	0.000294616	9606	Homo sapiens	CAMK2B;GRIA4		R-HSA-416320;R-HSA-421007;R-HSA-416639;R-HSA-416985
R-HSA-888590	GABA synthesis, release, reuptake and degradation	2	37	0.00259267	0.842452	0.880731	3	10	0.00073654	9606	Homo sapiens	SNAP25;SLC6A1		R-HSA-888589;R-HSA-444007;R-HSA-917744
R-HSA-2022854	Keratan sulfate biosynthesis	2	37	0.00259267	0.842452	0.880731	2	9	0.000662886	9606	Homo sapiens	B3GNT7;CHST1		R-HSA-2046175;R-HSA-2025724
R-HSA-936440	Negative regulators of DDX58/IFIH1 signaling	2	37	0.00259267	0.842452	0.880731	2	13	0.000957502	9606	Homo sapiens	HERC5;ISG15		R-HSA-936462;R-HSA-936563
R-HSA-5683826	Surfactant metabolism	3	52	0.00364375	0.842668	0.880731	6	29	0.00213597	9606	Homo sapiens	GATA6;CTSH;ZDHHC2		R-HSA-5683879;R-HSA-5685296;R-HSA-5683888;R-HSA-5686304;R-HSA-5684864;R-HSA-5685902
R-HSA-1638074	Keratan sulfate/keratin metabolism	3	52	0.00364375	0.842668	0.880731	3	16	0.00117846	9606	Homo sapiens	GAL;B3GNT7;CHST1		R-HSA-2046175;R-HSA-2025724;R-HSA-1630306
R-HSA-975871	MyD88 cascade initiated on plasma membrane	6	94	0.00658678	0.843458	0.880731	21	58	0.00427193	9606	Homo sapiens	DUSP4;BCAM;IRAK2;PELI1;FOS;NFKBIB		R-HSA-936942;R-HSA-975852;R-HSA-937034;R-HSA-168166;R-HSA-450337;R-HSA-975879;R-HSA-450346;R-HSA-936963;R-HSA-936960;R-HSA-168140;R-HSA-936991;R-HSA-450292;R-HSA-450325;R-HSA-937050;R-HSA-936986;R-HSA-203797;R-HSA-9630923;R-HSA-937044;R-HSA-168184;R-HSA-975861;R-HSA-975857
R-HSA-168142	Toll Like Receptor 10 (TLR10) Cascade	6	94	0.00658678	0.843458	0.880731	21	59	0.00434558	9606	Homo sapiens	DUSP4;BCAM;IRAK2;PELI1;FOS;NFKBIB		R-HSA-936942;R-HSA-975852;R-HSA-937034;R-HSA-168166;R-HSA-450337;R-HSA-975879;R-HSA-450346;R-HSA-936963;R-HSA-936960;R-HSA-168140;R-HSA-936991;R-HSA-450292;R-HSA-450325;R-HSA-937050;R-HSA-936986;R-HSA-203797;R-HSA-9630923;R-HSA-937044;R-HSA-168184;R-HSA-975861;R-HSA-975857
R-HSA-168176	Toll Like Receptor 5 (TLR5) Cascade	6	94	0.00658678	0.843458	0.880731	21	59	0.00434558	9606	Homo sapiens	DUSP4;BCAM;IRAK2;PELI1;FOS;NFKBIB		R-HSA-936942;R-HSA-975852;R-HSA-937034;R-HSA-168166;R-HSA-450337;R-HSA-975879;R-HSA-450346;R-HSA-936963;R-HSA-936960;R-HSA-168140;R-HSA-936991;R-HSA-450292;R-HSA-450325;R-HSA-937050;R-HSA-936986;R-HSA-203797;R-HSA-9630923;R-HSA-937044;R-HSA-168184;R-HSA-975861;R-HSA-975857
R-HSA-181438	Toll Like Receptor 2 (TLR2) Cascade	8	121	0.00847873	0.845256	0.880731	35	68	0.00500847	9606	Homo sapiens	DUSP4;BCAM;IRAK2;FGG;PELI1;FOS;CD36;NFKBIB		R-HSA-166082;R-HSA-937034;R-HSA-2201316;R-HSA-166091;R-HSA-2201322;R-HSA-166286;R-HSA-936963;R-HSA-166284;R-HSA-936960;R-HSA-168140;R-HSA-2559464;R-HSA-2559414;R-HSA-936991;R-HSA-450325;R-HSA-937050;R-HSA-936986;R-HSA-2262775;R-HSA-203797;R-HSA-166362;R-HSA-166363;R-HSA-9630923;R-HSA-937044;R-HSA-2262777;R-HSA-936942;R-HSA-168166;R-HSA-166119;R-HSA-450337;R-HSA-450346;R-HSA-937059;R-HSA-937022;R-…
R-HSA-168179	Toll Like Receptor TLR1:TLR2 Cascade	8	121	0.00847873	0.845256	0.880731	33	66	0.00486116	9606	Homo sapiens	DUSP4;BCAM;IRAK2;FGG;PELI1;FOS;CD36;NFKBIB		R-HSA-166082;R-HSA-937034;R-HSA-2201316;R-HSA-166091;R-HSA-2201322;R-HSA-166286;R-HSA-936963;R-HSA-166284;R-HSA-936960;R-HSA-168140;R-HSA-2559414;R-HSA-936991;R-HSA-450325;R-HSA-937050;R-HSA-936986;R-HSA-2262775;R-HSA-203797;R-HSA-166362;R-HSA-166363;R-HSA-9630923;R-HSA-937044;R-HSA-2262777;R-HSA-936942;R-HSA-168166;R-HSA-166119;R-HSA-450337;R-HSA-450346;R-HSA-937059;R-HSA-937022;R-HSA-450292;R-H…
R-HSA-1250347	SHC1 events in ERBB4 signaling	1	21	0.00147152	0.847038	0.880731	4	4	0.000294616	9606	Homo sapiens	NRG4		R-HSA-1250357;R-HSA-1250383;R-HSA-1250380;R-HSA-1250348
R-HSA-430039	mRNA decay by 5' to 3' exoribonuclease	1	21	0.00147152	0.847038	0.880731	3	3	0.000220962	9606	Homo sapiens	LSM3		R-HSA-429860;R-HSA-429845;R-HSA-429978
R-HSA-8964616	G beta:gamma signalling through CDC42	1	21	0.00147152	0.847038	0.880731	5	6	0.000441924	9606	Homo sapiens	GNG4		R-HSA-8964634;R-HSA-8964604;R-HSA-8964605;R-HSA-8964614;R-HSA-8964599
R-HSA-8866910	TFAP2 (AP-2) family regulates transcription of growth factors and their receptors	1	21	0.00147152	0.847038	0.880731	14	18	0.00132577	9606	Homo sapiens	TFAP2A		R-HSA-8864999;R-HSA-8864453;R-HSA-8864737;R-HSA-8864431;R-HSA-8864395;R-HSA-8864426;R-HSA-8864936;R-HSA-8864690;R-HSA-8864466;R-HSA-8864433;R-HSA-8864989;R-HSA-8864381;R-HSA-8864412;R-HSA-8864698
R-HSA-1963640	GRB2 events in ERBB2 signaling	1	21	0.00147152	0.847038	0.880731	2	4	0.000294616	9606	Homo sapiens	NRG4		R-HSA-1306969;R-HSA-1306972
R-HSA-141430	Inactivation of APC/C via direct inhibition of the APC/C complex	1	21	0.00147152	0.847038	0.880731	1	2	0.000147308	9606	Homo sapiens	UBE2E1		R-HSA-141423
R-HSA-3134975	Regulation of innate immune responses to cytosolic DNA	1	21	0.00147152	0.847038	0.880731	4	9	0.000662886	9606	Homo sapiens	NLRP4		R-HSA-3249392;R-HSA-8948703;R-HSA-3249386;R-HSA-8948709
R-HSA-141405	Inhibition of the proteolytic activity of APC/C required for the onset of anaphase by mitotic spindle checkpoint components	1	21	0.00147152	0.847038	0.880731	1	3	0.000220962	9606	Homo sapiens	UBE2E1		R-HSA-141423
R-HSA-432047	Passive transport by Aquaporins	1	21	0.00147152	0.847038	0.880731	2	8	0.000589232	9606	Homo sapiens	AQP11		R-HSA-507870;R-HSA-507868
R-HSA-9671793	Diseases of hemostasis	1	21	0.00147152	0.847038	0.880731	3	18	0.00132577	9606	Homo sapiens	F12		R-HSA-9653249;R-HSA-9651456;R-HSA-9655046
R-HSA-9651496	Defects of contact activation system (CAS) and kallikrein/kinin system (KKS)	1	21	0.00147152	0.847038	0.880731	3	18	0.00132577	9606	Homo sapiens	F12		R-HSA-9653249;R-HSA-9651456;R-HSA-9655046
R-HSA-6798163	Choline catabolism	1	21	0.00147152	0.847038	0.880731	1	8	0.000589232	9606	Homo sapiens	CHDH		R-HSA-6797961
R-HSA-5693565	Recruitment and ATM-mediated phosphorylation of repair and signaling proteins at DNA double strand breaks	4	67	0.00469484	0.848166	0.880731	29	39	0.0028725	9606	Homo sapiens	HIST1H2BJ;EYA2;HIST1H2BG		R-HSA-5682967;R-HSA-5683735;R-HSA-69891;R-HSA-5682965;R-HSA-5683986;R-HSA-5682588;R-HSA-5683930;R-HSA-5682586;R-HSA-5683801;R-HSA-5682629;R-HSA-5683077;R-HSA-5693583;R-HSA-5683405;R-HSA-5682992;R-HSA-5693566;R-HSA-5683967;R-HSA-5683964;R-HSA-5683384;R-HSA-5683385;R-HSA-5682598;R-HSA-5682983;R-HSA-5693602;R-HSA-5693536;R-HSA-5683425;R-HSA-5682607;R-HSA-5682863;R-HSA-5693551;R-HSA-5693549;R-HSA-568…
R-HSA-112043	PLC beta mediated events	4	67	0.00469484	0.848166	0.880731	9	32	0.00235693	9606	Homo sapiens	CAMK2B;PDE1B;PLA2G4A;ADCY2		R-HSA-111955;R-HSA-442725;R-HSA-111956;R-HSA-111881;R-HSA-111883;R-HSA-111930;R-HSA-111898;R-HSA-9617583;R-HSA-444792
R-HSA-5578749	Transcriptional regulation by small RNAs	5	81	0.00567585	0.848285	0.880731	1	5	0.00036827	9606	Homo sapiens	HIST1H2BJ;HIST1H2AD;HIST1H2BG;HIST1H3D		R-HSA-5578742
R-HSA-76009	Platelet Aggregation (Plug Formation)	3	53	0.00371383	0.851693	0.880731	17	27	0.00198866	9606	Homo sapiens	FGG;RAPGEF3;PDK1		R-HSA-354149;R-HSA-429415;R-HSA-354087;R-HSA-372705;R-HSA-429441;R-HSA-432110;R-HSA-377644;R-HSA-354124;R-HSA-377641;R-HSA-377640;R-HSA-377643;R-HSA-939265;R-HSA-372693;R-HSA-354165;R-HSA-354066;R-HSA-372697;R-HSA-354073
R-HSA-1489509	DAG and IP3 signaling	3	53	0.00371383	0.851693	0.880731	6	28	0.00206231	9606	Homo sapiens	CAMK2B;PDE1B;ADCY2		R-HSA-111955;R-HSA-442725;R-HSA-111956;R-HSA-111930;R-HSA-9617583;R-HSA-444792
R-HSA-1296065	Inwardly rectifying K+ channels	2	38	0.00266274	0.852952	0.880731	4	7	0.000515578	9606	Homo sapiens	GNG4;ABCC9		R-HSA-1013020;R-HSA-1013013;R-HSA-1013012;R-HSA-1369017
R-HSA-5675482	Regulation of necroptotic cell death	2	38	0.00266274	0.852952	0.880731	4	18	0.00132577	9606	Homo sapiens	PELI1;TNFRSF10B		R-HSA-3465429;R-HSA-5675456;R-HSA-9686922;R-HSA-9686920
R-HSA-1980145	Signaling by NOTCH2	2	38	0.00266274	0.852952	0.880731	3	20	0.00147308	9606	Homo sapiens	NEURL1B;DLL1		R-HSA-2172172;R-HSA-1980048;R-HSA-157629
R-HSA-4791275	Signaling by WNT in cancer	2	38	0.00266274	0.852952	0.880731	2	16	0.00117846	9606	Homo sapiens	LRP5;DKK2		R-HSA-5340587;R-HSA-5339711
R-HSA-2173796	SMAD2/SMAD3:SMAD4 heterotrimer regulates transcription	2	38	0.00266274	0.852952	0.880731	2	19	0.00139943	9606	Homo sapiens	SERPINE1		R-HSA-2106586;R-HSA-9736959
R-HSA-111465	Apoptotic cleavage of cellular proteins	2	38	0.00266274	0.852952	0.880731	2	38	0.00279885	9606	Homo sapiens	GAS2;PRKCQ		R-HSA-201603;R-HSA-201639
R-HSA-977443	GABA receptor activation	4	68	0.00476491	0.856017	0.880731	8	12	0.000883848	9606	Homo sapiens	GNAL;GNAT3;GNG4;ADCY2		R-HSA-170674;R-HSA-1013020;R-HSA-170666;R-HSA-1013013;R-HSA-392206;R-HSA-1013012;R-HSA-170686;R-HSA-170671
R-HSA-1227986	Signaling by ERBB2	4	68	0.00476491	0.856017	0.880731	26	46	0.00338808	9606	Homo sapiens	GRB7;ERBB3;NRG4;FYN		R-HSA-1250195;R-HSA-8848005;R-HSA-6785636;R-HSA-1358801;R-HSA-1306969;R-HSA-1250463;R-HSA-1250462;R-HSA-1306972;R-HSA-1358790;R-HSA-6785648;R-HSA-1963589;R-HSA-1306953;R-HSA-1358798;R-HSA-1247497;R-HSA-1358792;R-HSA-1250189;R-HSA-1963586;R-HSA-1963581;R-HSA-1963582;R-HSA-1250486;R-HSA-1963578;R-HSA-1306979;R-HSA-1963563;R-HSA-1250346;R-HSA-8863804;R-HSA-8847995
R-HSA-2219530	Constitutive Signaling by Aberrant PI3K in Cancer	6	96	0.00672693	0.856971	0.880731	1	2	0.000147308	9606	Homo sapiens	ERBB3;NRG4;PDGFA;FYN;ESR2		R-HSA-2400009
R-HSA-3214847	HATs acetylate histones	7	110	0.00770794	0.859607	0.880731	10	15	0.00110481	9606	Homo sapiens	CPNE9;ING5;HIST1H2BJ;HIST1H2AD;HIST1H2BG;HIST1H3D		R-HSA-5144542;R-HSA-3301345;R-HSA-3318486;R-HSA-3321975;R-HSA-3301237;R-HSA-3697008;R-HSA-3662335;R-HSA-3697920;R-HSA-3318415;R-HSA-3318413
R-HSA-372708	p130Cas linkage to MAPK signaling for integrins	1	22	0.00154159	0.86013	0.880731	3	3	0.000220962	9606	Homo sapiens	FGG		R-HSA-372693;R-HSA-372705;R-HSA-372697
R-HSA-190840	Microtubule-dependent trafficking of connexons from Golgi to the plasma membrane	1	22	0.00154159	0.86013	0.880731	2	2	0.000147308	9606	Homo sapiens	GJA1		R-HSA-190520;R-HSA-190782
R-HSA-176407	Conversion from APC/C:Cdc20 to APC/C:Cdh1 in late anaphase	1	22	0.00154159	0.86013	0.880731	2	3	0.000220962	9606	Homo sapiens	UBE2E1		R-HSA-174224;R-HSA-174070
R-HSA-164938	Nef-mediates down modulation of cell surface receptors by recruiting them to clathrin adapters	1	22	0.00154159	0.86013	0.880731	3	15	0.00110481	9606	Homo sapiens	AP1S3		R-HSA-182263;R-HSA-182279;R-HSA-182286
R-HSA-211916	Vitamins	1	22	0.00154159	0.86013	0.880731	1	5	0.00036827	9606	Homo sapiens	CYP24A1		R-HSA-211950
R-HSA-2022857	Keratan sulfate degradation	1	22	0.00154159	0.86013	0.880731	1	7	0.000515578	9606	Homo sapiens	GAL		R-HSA-1630306
R-HSA-193993	Mineralocorticoid biosynthesis	1	22	0.00154159	0.86013	0.880731	1	7	0.000515578	9606	Homo sapiens	CYP21A2		R-HSA-193964
R-HSA-400511	Synthesis, secretion, and inactivation of Glucose-dependent Insulinotropic Polypeptide (GIP)	1	22	0.00154159	0.86013	0.880731	1	7	0.000515578	9606	Homo sapiens	PAX6		R-HSA-400500
R-HSA-196791	Vitamin D (calciferol) metabolism	1	22	0.00154159	0.86013	0.880731	1	19	0.00139943	9606	Homo sapiens	CYP24A1		R-HSA-209765
R-HSA-2028269	Signaling by Hippo	1	22	0.00154159	0.86013	0.880731	1	30	0.00220962	9606	Homo sapiens	WWC1		R-HSA-2038398
R-HSA-199418	Negative regulation of the PI3K/AKT network	9	137	0.00959989	0.861302	0.880731	4	10	0.00073654	9606	Homo sapiens	ERBB3;NRG4;PIP4K2A;PDGFA;FYN;PIP5K1B;TRIB1;ESR2		R-HSA-199443;R-HSA-2316434;R-HSA-1675776;R-HSA-1676082
R-HSA-399721	Glutamate binding, activation of AMPA receptors and synaptic plasticity	2	39	0.00273281	0.86281	0.880731	9	9	0.000662886	9606	Homo sapiens	CAMK2B;GRIA4		R-HSA-420980;R-HSA-416320;R-HSA-399712;R-HSA-420977;R-HSA-421007;R-HSA-416639;R-HSA-399711;R-HSA-420975;R-HSA-416985
R-HSA-397795	G-protein beta:gamma signalling	2	39	0.00273281	0.86281	0.880731	13	15	0.00110481	9606	Homo sapiens	GNG4;PDK1		R-HSA-392295;R-HSA-8964271;R-HSA-392300;R-HSA-8964614;R-HSA-8964634;R-HSA-8964604;R-HSA-8964605;R-HSA-8964317;R-HSA-398193;R-HSA-8964241;R-HSA-9603279;R-HSA-398040;R-HSA-8964599
R-HSA-917977	Transferrin endocytosis and recycling	2	39	0.00273281	0.86281	0.880731	3	11	0.000810194	9606	Homo sapiens	TFR2;ATP6V0C		R-HSA-5252133;R-HSA-5691150;R-HSA-917841
R-HSA-1855204	Synthesis of IP3 and IP4 in the cytosol	2	39	0.00273281	0.86281	0.880731	1	12	0.000883848	9606	Homo sapiens	ITPKC		R-HSA-1855153
R-HSA-166016	Toll Like Receptor 4 (TLR4) Cascade	10	151	0.0105809	0.865554	0.880731	35	95	0.00699713	9606	Homo sapiens	DNM3;DUSP4;BCAM;IRAK2;FGG;PELI1;FOS;CD36;DNM1;NFKBIB		R-HSA-166082;R-HSA-937034;R-HSA-2201316;R-HSA-166091;R-HSA-2201322;R-HSA-166286;R-HSA-936963;R-HSA-166284;R-HSA-936960;R-HSA-168140;R-HSA-2559414;R-HSA-936991;R-HSA-450325;R-HSA-937050;R-HSA-936986;R-HSA-2262775;R-HSA-203797;R-HSA-166362;R-HSA-166363;R-HSA-9630923;R-HSA-937044;R-HSA-2262777;R-HSA-936942;R-HSA-168166;R-HSA-166119;R-HSA-450337;R-HSA-2201293;R-HSA-450346;R-HSA-937059;R-HSA-937022;R-…
R-HSA-6809371	Formation of the cornified envelope	9	138	0.00966996	0.866611	0.880731	9	27	0.00198866	9606	Homo sapiens	KRT33B;KRT80;KRT18;KRT17;KRT8;KRT7;PCSK6		R-HSA-6810357;R-HSA-8849797;R-HSA-6811539;R-HSA-6814387;R-HSA-8942224;R-HSA-6814734;R-HSA-6814764;R-HSA-6814298;R-HSA-6810937
R-HSA-112316	Neuronal System	37	489	0.0342653	0.867234	0.880731	94	216	0.0159093	9606	Homo sapiens	CAMK2B;KCNG1;SNAP25;NLGN1;KCNC2;NRXN1;KCNC3;PRKAG2;GRIK4;KCNA4;ADCY2;GRIK2;SLC6A1;KIF17;PANX2;GRIN2A;LRRTM3;GNG4;GNAT3;SLITRK4;SLITRK3;NEFL;SLITRK5;DLGAP1;PDK1;GRIA4;NLGN4X;KCND2;CACNA2D3;CACNA2D2;ABCC9;GNAL;NAAA;KCNK3;SHANK1		R-HSA-9609746;R-HSA-888589;R-HSA-9611030;R-HSA-9619478;R-HSA-6794338;R-HSA-6794336;R-HSA-6794351;R-HSA-421007;R-HSA-6794349;R-HSA-392206;R-HSA-6794348;R-HSA-9610270;R-HSA-6797803;R-HSA-6794346;R-HSA-6794345;R-HSA-442760;R-HSA-9610653;R-HSA-6794344;R-HSA-374922;R-HSA-9610627;R-HSA-6794357;R-HSA-6794356;R-HSA-1013020;R-HSA-438037;R-HSA-6794354;R-HSA-6797554;R-HSA-6794353;R-HSA-6794352;R-HSA-9609738…
R-HSA-194068	Bile acid and bile salt metabolism	8	125	0.00875902	0.868426	0.880731	19	99	0.00729174	9606	Homo sapiens	ACOX2;FABP6;AKR1C1;ALB;ABCC9;CYP7B1;PPIL3		R-HSA-9733973;R-HSA-192160;R-HSA-192065;R-HSA-192097;R-HSA-9733969;R-HSA-191972;R-HSA-192036;R-HSA-193800;R-HSA-194153;R-HSA-192335;R-HSA-192051;R-HSA-193841;R-HSA-193781;R-HSA-193816;R-HSA-193369;R-HSA-9733960;R-HSA-193758;R-HSA-9733545;R-HSA-193789
R-HSA-9707616	Heme signaling	4	70	0.00490505	0.870685	0.880731	8	25	0.00184135	9606	Homo sapiens	MAFK;EMB;NPAS2		R-HSA-9708423;R-HSA-1368065;R-HSA-9707523;R-HSA-9707645;R-HSA-9708430;R-HSA-549475;R-HSA-5663245;R-HSA-9707690
R-HSA-163359	Glucagon signaling in metabolic regulation	2	40	0.00280289	0.872059	0.880731	3	6	0.000441924	9606	Homo sapiens	GNG4;ADCY2		R-HSA-163617;R-HSA-825631;R-HSA-164377
R-HSA-1912420	Pre-NOTCH Processing in Golgi	1	23	0.00161166	0.872102	0.880731	8	8	0.000589232	9606	Homo sapiens	NOTCH4		R-HSA-1912382;R-HSA-1912379;R-HSA-1912378;R-HSA-1912372;R-HSA-1912374;R-HSA-1912369;R-HSA-1912352;R-HSA-1912355
R-HSA-416993	Trafficking of GluR2-containing AMPA receptors	1	23	0.00161166	0.872102	0.880731	3	3	0.000220962	9606	Homo sapiens	GRIA4		R-HSA-421007;R-HSA-416639;R-HSA-416985
R-HSA-418217	G beta:gamma signalling through PLC beta	1	23	0.00161166	0.872102	0.880731	2	2	0.000147308	9606	Homo sapiens	GNG4		R-HSA-398193;R-HSA-398040
R-HSA-190872	Transport of connexons to the plasma membrane	1	23	0.00161166	0.872102	0.880731	2	3	0.000220962	9606	Homo sapiens	GJA1		R-HSA-190520;R-HSA-190782
R-HSA-181429	Serotonin Neurotransmitter Release Cycle	1	23	0.00161166	0.872102	0.880731	2	4	0.000294616	9606	Homo sapiens	SNAP25		R-HSA-380901;R-HSA-380905
R-HSA-164378	PKA activation in glucagon signalling	1	23	0.00161166	0.872102	0.880731	1	2	0.000147308	9606	Homo sapiens	ADCY2		R-HSA-164377
R-HSA-500657	Presynaptic function of Kainate receptors	1	23	0.00161166	0.872102	0.880731	1	2	0.000147308	9606	Homo sapiens	GNG4		R-HSA-500717
R-HSA-163615	PKA activation	1	23	0.00161166	0.872102	0.880731	1	4	0.000294616	9606	Homo sapiens	ADCY2		R-HSA-111930
R-HSA-5625900	RHO GTPases activate CIT	1	23	0.00161166	0.872102	0.880731	1	6	0.000441924	9606	Homo sapiens	MYH11		R-HSA-5671919
R-HSA-6804760	Regulation of TP53 Activity through Methylation	1	23	0.00161166	0.872102	0.880731	1	12	0.000883848	9606	Homo sapiens	SMYD3		R-HSA-3222237
R-HSA-1839117	Signaling by cytosolic FGFR1 fusion mutants	1	23	0.00161166	0.872102	0.880731	1	14	0.00103116	9606	Homo sapiens	STAT3		R-HSA-1888198
R-HSA-111471	Apoptotic factor-mediated response	1	23	0.00161166	0.872102	0.880731	1	28	0.00206231	9606	Homo sapiens	UACA		R-HSA-6804652
R-HSA-442755	Activation of NMDA receptors and postsynaptic events	7	113	0.00791816	0.876761	0.880731	33	71	0.00522943	9606	Homo sapiens	CAMK2B;GRIN2A;NEFL;PRKAG2;KIF17;PDK1;GRIA4		R-HSA-9609746;R-HSA-9610195;R-HSA-9611030;R-HSA-9619542;R-HSA-9619478;R-HSA-9610327;R-HSA-9610270;R-HSA-442760;R-HSA-9610653;R-HSA-9610627;R-HSA-438037;R-HSA-9609738;R-HSA-9609742;R-HSA-9610802;R-HSA-432164;R-HSA-442725;R-HSA-432162;R-HSA-9612085;R-HSA-9619515;R-HSA-432172;R-HSA-442732;R-HSA-9619449;R-HSA-9610750;R-HSA-9618750;R-HSA-9610879;R-HSA-445367;R-HSA-442739;R-HSA-9611368;R-HSA-9610408;R-…
R-HSA-111885	Opioid Signalling	7	113	0.00791816	0.876761	0.880731	23	59	0.00434558	9606	Homo sapiens	CAMK2B;GNAL;PDE1B;GNAT3;GNG4;PLA2G4A;ADCY2		R-HSA-442725;R-HSA-167429;R-HSA-170666;R-HSA-111881;R-HSA-111883;R-HSA-392206;R-HSA-167433;R-HSA-170671;R-HSA-112271;R-HSA-170674;R-HSA-170672;R-HSA-111955;R-HSA-167408;R-HSA-111956;R-HSA-170676;R-HSA-170677;R-HSA-167419;R-HSA-111930;R-HSA-111898;R-HSA-170686;R-HSA-9617583;R-HSA-444792;R-HSA-170685
R-HSA-373755	Semaphorin interactions	4	71	0.00497512	0.877524	0.880731	17	41	0.00301981	9606	Homo sapiens	SEMA6A;PLXNB3;FYN;MYH11		R-HSA-399942;R-HSA-399941;R-HSA-399939;R-HSA-399951;R-HSA-399946;R-HSA-399947;R-HSA-399944;R-HSA-416723;R-HSA-399952;R-HSA-399934;R-HSA-399935;R-HSA-419197;R-HSA-399933;R-HSA-416698;R-HSA-399930;R-HSA-399931;R-HSA-399928
R-HSA-2426168	Activation of gene expression by SREBF (SREBP)	4	71	0.00497512	0.877524	0.880731	4	42	0.00309347	9606	Homo sapiens	HMGCS1;ELOVL6		R-HSA-2426149;R-HSA-1655848;R-HSA-1655835;R-HSA-2426150
R-HSA-202131	Metabolism of nitric oxide: NOS3 activation and regulation	2	41	0.00287296	0.880731	0.880731	21	26	0.001915	9606	Homo sapiens	NOS3;NOSTRIN		R-HSA-203553;R-HSA-203680;R-HSA-202144;R-HSA-203712;R-HSA-1497810;R-HSA-203716;R-HSA-203625;R-HSA-202127;R-HSA-203567;R-HSA-203662;R-HSA-203565;R-HSA-1497784;R-HSA-1497796;R-HSA-202129;R-HSA-203700;R-HSA-202132;R-HSA-203611;R-HSA-202137;R-HSA-202111;R-HSA-202110;R-HSA-203613
R-HSA-190861	Gap junction assembly	2	41	0.00287296	0.880731	0.880731	10	16	0.00117846	9606	Homo sapiens	GJA1;GJA5		R-HSA-191072;R-HSA-190662;R-HSA-190790;R-HSA-190788;R-HSA-190682;R-HSA-190520;R-HSA-191737;R-HSA-190686;R-HSA-190782;R-HSA-190877
R-HSA-6814122	Cooperation of PDCL (PhLP1) and TRiC/CCT in G-protein beta folding	2	41	0.00287296	0.880731	0.880731	6	11	0.000810194	9606	Homo sapiens	GNG4;PDCL		R-HSA-8850534;R-HSA-6814418;R-HSA-8850560;R-HSA-8850527;R-HSA-6814121;R-HSA-6814409
R-HSA-5673000	RAF activation	2	41	0.00287296	0.880731	0.880731	2	12	0.000883848	9606	Homo sapiens	CAMK2B;MRAS		R-HSA-9658445;R-HSA-5672969
R-HSA-6783783	Interleukin-10 signaling	5	86	0.00602621	0.881494	0.881494	8	15	0.00110481	9606	Homo sapiens	CSF1;STAT3;TNFRSF1B		R-HSA-6784791;R-HSA-8937656;R-HSA-6784006;R-HSA-6784323;R-HSA-6784765;R-HSA-6790029;R-HSA-6784763;R-HSA-8937654
R-HSA-114608	Platelet degranulation	9	141	0.00988018	0.881558	0.881558	2	11	0.000810194	9606	Homo sapiens	ISLR;TG;TMSB4X;ALB;SERPINE1;FGG;PDGFA;CD36;CLU		R-HSA-481044;R-HSA-481007
R-HSA-174048	APC/C:Cdc20 mediated degradation of Cyclin B	1	24	0.00168173	0.883051	0.883051	3	3	0.000220962	9606	Homo sapiens	UBE2E1		R-HSA-174227;R-HSA-174120;R-HSA-174157
R-HSA-392851	Prostacyclin signalling through prostacyclin receptor	1	24	0.00168173	0.883051	0.883051	3	4	0.000294616	9606	Homo sapiens	GNG4		R-HSA-392852;R-HSA-392870;R-HSA-392874
R-HSA-392517	Rap1 signalling	1	24	0.00168173	0.883051	0.883051	2	7	0.000515578	9606	Homo sapiens	RAPGEF3		R-HSA-392834;R-HSA-939265
R-HSA-5627117	RHO GTPases Activate ROCKs	1	24	0.00168173	0.883051	0.883051	2	7	0.000515578	9606	Homo sapiens	MYH11		R-HSA-419232;R-HSA-419197
R-HSA-113510	E2F mediated regulation of DNA replication	1	24	0.00168173	0.883051	0.883051	1	4	0.000294616	9606	Homo sapiens	ORC2		R-HSA-113638
R-HSA-844456	The NLRP3 inflammasome	1	24	0.00168173	0.883051	0.883051	1	18	0.00132577	9606	Homo sapiens	CASP1		R-HSA-844612
R-HSA-4641258	Degradation of DVL	3	57	0.00399411	0.883418	0.883418	5	7	0.000515578	9606	Homo sapiens	PSMC4;HECW1;DACT1		R-HSA-4641159;R-HSA-4641155;R-HSA-1504193;R-HSA-4641260;R-HSA-4641147
R-HSA-9013405	RHOD GTPase cycle	3	57	0.00399411	0.883418	0.883418	3	9	0.000662886	9606	Homo sapiens	ARHGAP1;PAK7;EFHD1		R-HSA-9013437;R-HSA-9693214;R-HSA-9693198
R-HSA-5693571	Nonhomologous End-Joining (NHEJ)	3	57	0.00399411	0.883418	0.883418	4	13	0.000957502	9606	Homo sapiens	HIST1H2BJ;HIST1H2BG		R-HSA-5686900;R-HSA-5686704;R-HSA-5693599;R-HSA-5686685
R-HSA-74751	Insulin receptor signalling cascade	4	72	0.0050452	0.884048	0.884048	8	25	0.00184135	9606	Homo sapiens	PDE3B;GRB10;TRIB1;PDK1		R-HSA-74707;R-HSA-109701;R-HSA-74740;R-HSA-109700;R-HSA-109702;R-HSA-162363;R-HSA-110011;R-HSA-162425
R-HSA-975138	TRAF6 mediated induction of NFkB and MAP kinases upon TLR7/8 or 9 activation	6	101	0.00707729	0.886589	0.886589	18	48	0.00353539	9606	Homo sapiens	DUSP4;BCAM;IRAK2;PELI1;FOS;NFKBIB		R-HSA-168166;R-HSA-975147;R-HSA-450337;R-HSA-975142;R-HSA-450346;R-HSA-975139;R-HSA-168140;R-HSA-450358;R-HSA-975103;R-HSA-975100;R-HSA-450292;R-HSA-450325;R-HSA-203797;R-HSA-975097;R-HSA-9630923;R-HSA-168184;R-HSA-975122;R-HSA-975185
R-HSA-73854	RNA Polymerase I Promoter Clearance	5	87	0.00609628	0.887335	0.887335	2	10	0.00073654	9606	Homo sapiens	HIST1H2BJ;HIST1H2AD;HIST1H2BG;HIST1H3D		R-HSA-73718;R-HSA-74986
R-HSA-1655829	Regulation of cholesterol biosynthesis by SREBP (SREBF)	5	87	0.00609628	0.887335	0.887335	5	52	0.00383001	9606	Homo sapiens	HMGCS1;ELOVL6;MBTPS2		R-HSA-2426149;R-HSA-1655848;R-HSA-1655851;R-HSA-1655835;R-HSA-2426150
R-HSA-6811558	PI5P, PP2A and IER3 Regulate PI3K/AKT Signaling	8	129	0.00903931	0.888687	0.888687	3	7	0.000515578	9606	Homo sapiens	ERBB3;NRG4;PIP4K2A;PDGFA;FYN;PIP5K1B;ESR2		R-HSA-2316434;R-HSA-1675776;R-HSA-1676082
R-HSA-5260271	Diseases of Immune System	2	42	0.00294303	0.888856	0.888856	4	15	0.00110481	9606	Homo sapiens	FGG;CD36		R-HSA-5602353;R-HSA-5602672;R-HSA-5602383;R-HSA-5602606
R-HSA-5602358	Diseases associated with the TLR signaling cascade	2	42	0.00294303	0.888856	0.888856	4	15	0.00110481	9606	Homo sapiens	FGG;CD36		R-HSA-5602353;R-HSA-5602672;R-HSA-5602383;R-HSA-5602606
R-HSA-381042	PERK regulates gene expression	2	42	0.00294303	0.888856	0.888856	1	11	0.000810194	9606	Homo sapiens	ATF3		R-HSA-1791173
R-HSA-8964043	Plasma lipoprotein clearance	2	42	0.00294303	0.888856	0.888856	3	35	0.00257789	9606	Homo sapiens	SCARB1;CES3		R-HSA-349637;R-HSA-349638;R-HSA-8937442
R-HSA-163560	Triglyceride catabolism	2	42	0.00294303	0.888856	0.888856	1	17	0.00125212	9606	Homo sapiens	FABP2;FABP6		R-HSA-5334794
R-HSA-5654687	Downstream signaling of activated FGFR1	2	42	0.00294303	0.888856	0.888856	1	24	0.0017677	9606	Homo sapiens	FLRT2;FLRT3		R-HSA-5656064
R-HSA-109704	PI3K Cascade	3	58	0.00406419	0.890339	0.890339	5	6	0.000441924	9606	Homo sapiens	PDE3B;TRIB1;PDK1		R-HSA-109701;R-HSA-109700;R-HSA-109702;R-HSA-162363;R-HSA-162425
R-HSA-187037	Signaling by NTRK1 (TRKA)	9	143	0.0100203	0.890739	0.890739	27	102	0.00751271	9606	Homo sapiens	DNM3;DUSP4;EGR1;STAT3;FOS;TRIB1;ZNF225;DNM1		R-HSA-9613202;R-HSA-9031624;R-HSA-9613207;R-HSA-9613210;R-HSA-9031616;R-HSA-198732;R-HSA-9612483;R-HSA-203797;R-HSA-9621386;R-HSA-9621385;R-HSA-9031575;R-HSA-177501;R-HSA-9612493;R-HSA-9621042;R-HSA-9620723;R-HSA-9620663;R-HSA-9621048;R-HSA-9612514;R-HSA-9613219;R-HSA-9612516;R-HSA-9621035;R-HSA-9621032;R-HSA-9612073;R-HSA-9616105;R-HSA-9616110;R-HSA-9616367;R-HSA-9612076
R-HSA-975155	MyD88 dependent cascade initiated on endosome	6	102	0.00714736	0.891845	0.891845	21	63	0.0046402	9606	Homo sapiens	DUSP4;BCAM;IRAK2;PELI1;FOS;NFKBIB		R-HSA-168166;R-HSA-975115;R-HSA-975147;R-HSA-450337;R-HSA-975142;R-HSA-975111;R-HSA-450346;R-HSA-975139;R-HSA-168140;R-HSA-450358;R-HSA-975103;R-HSA-975100;R-HSA-450292;R-HSA-450325;R-HSA-203797;R-HSA-975160;R-HSA-975097;R-HSA-9630923;R-HSA-168184;R-HSA-975122;R-HSA-975185
R-HSA-5620922	BBSome-mediated cargo-targeting to cilium	1	25	0.0017518	0.893062	0.893062	2	5	0.00036827	9606	Homo sapiens	SSTR3		R-HSA-5624127;R-HSA-5624126
R-HSA-1362409	Mitochondrial iron-sulfur cluster biogenesis	1	25	0.0017518	0.893062	0.893062	1	6	0.000441924	9606	Homo sapiens	ISCA1		R-HSA-8878815
R-HSA-977347	Serine biosynthesis	1	25	0.0017518	0.893062	0.893062	1	7	0.000515578	9606	Homo sapiens	SERINC2		R-HSA-8932980
R-HSA-416572	Sema4D induced cell migration and growth-cone collapse	1	25	0.0017518	0.893062	0.893062	1	7	0.000515578	9606	Homo sapiens	MYH11		R-HSA-419197
R-HSA-77111	Synthesis of Ketone Bodies	1	25	0.0017518	0.893062	0.893062	1	8	0.000589232	9606	Homo sapiens	HMGCS1		R-HSA-73918
R-HSA-8848584	Wax and plasmalogen biosynthesis	1	25	0.0017518	0.893062	0.893062	1	10	0.00073654	9606	Homo sapiens	FAR2		R-HSA-390438
R-HSA-445144	Signal transduction by L1	1	25	0.0017518	0.893062	0.893062	1	11	0.000810194	9606	Homo sapiens	ITGA5		R-HSA-374686
R-HSA-1181150	Signaling by NODAL	1	25	0.0017518	0.893062	0.893062	1	12	0.000883848	9606	Homo sapiens	PCSK6		R-HSA-1181152
R-HSA-391903	Eicosanoid ligand-binding receptors	1	25	0.0017518	0.893062	0.893062	1	14	0.00103116	9606	Homo sapiens	PTGER3		R-HSA-391933
R-HSA-8982491	Glycogen metabolism	2	43	0.0030131	0.896465	0.896465	10	39	0.0028725	9606	Homo sapiens	PPP1R3C;NHLRC1		R-HSA-3781001;R-HSA-3781018;R-HSA-3781021;R-HSA-3781023;R-HSA-3781009;R-HSA-3781024;R-HSA-3780995;R-HSA-3781011;R-HSA-3780994;R-HSA-3780997
R-HSA-6804757	Regulation of TP53 Degradation	2	43	0.0030131	0.896465	0.896465	3	30	0.00220962	9606	Homo sapiens	USP2;PDK1		R-HSA-5689972;R-HSA-6795473;R-HSA-6805022
R-HSA-8941326	RUNX2 regulates bone development	2	43	0.0030131	0.896465	0.896465	2	32	0.00235693	9606	Homo sapiens	HDAC4;HEY2		R-HSA-9008177;R-HSA-9008326
R-HSA-168181	Toll Like Receptor 7/8 (TLR7/8) Cascade	6	103	0.00721743	0.896892	0.896892	21	66	0.00486116	9606	Homo sapiens	DUSP4;BCAM;IRAK2;PELI1;FOS;NFKBIB		R-HSA-168166;R-HSA-975115;R-HSA-975147;R-HSA-450337;R-HSA-975142;R-HSA-975111;R-HSA-450346;R-HSA-975139;R-HSA-168140;R-HSA-450358;R-HSA-975103;R-HSA-975100;R-HSA-450292;R-HSA-450325;R-HSA-203797;R-HSA-975160;R-HSA-975097;R-HSA-9630923;R-HSA-168184;R-HSA-975122;R-HSA-975185
R-HSA-5250941	Negative epigenetic regulation of rRNA expression	5	89	0.00623642	0.898277	0.898277	6	12	0.000883848	9606	Homo sapiens	HIST1H2BJ;HIST1H2AD;HIST1H2BG;HIST1H3D		R-HSA-427527;R-HSA-427514;R-HSA-5227490;R-HSA-433672;R-HSA-427528;R-HSA-427337
R-HSA-73864	RNA Polymerase I Transcription	5	89	0.00623642	0.898277	0.898277	2	14	0.00103116	9606	Homo sapiens	HIST1H2BJ;HIST1H2AD;HIST1H2BG;HIST1H3D		R-HSA-73718;R-HSA-74986
R-HSA-5357801	Programmed Cell Death	16	238	0.0166772	0.900863	0.900863	26	197	0.0145098	9606	Homo sapiens	UNC5B;STAT3;TNFRSF10B;UACA;DNM1;PSMC4;IRF1;CASP4;GAS2;PELI1;CASP1;BMF;PRKCQ;HIST1H1C		R-HSA-201603;R-HSA-211715;R-HSA-9710101;R-HSA-9710294;R-HSA-9710295;R-HSA-508163;R-HSA-139908;R-HSA-139909;R-HSA-6804652;R-HSA-9647680;R-HSA-5675456;R-HSA-8867344;R-HSA-9686922;R-HSA-5213462;R-HSA-9686920;R-HSA-3465448;R-HSA-3465429;R-HSA-418852;R-HSA-201639;R-HSA-211239;R-HSA-141156;R-HSA-418849;R-HSA-211247;R-HSA-3371359;R-HSA-6790025;R-HSA-139952
R-HSA-9013148	CDC42 GTPase cycle	10	159	0.0111415	0.901251	0.901251	4	6	0.000441924	9606	Homo sapiens	PREX2;DOCK11;FMNL2;SH3PXD2A;WIPF1;ARHGDIB;WIPF3;WDR91;ARHGAP1;PAK7		R-HSA-9013161;R-HSA-9013157;R-HSA-9013159;R-HSA-9013158
R-HSA-418346	Platelet homeostasis	7	118	0.00826852	0.901466	0.901466	12	30	0.00220962	9606	Homo sapiens	GUCY1A2;PDE1B;NOS3;GNG4;PLA2G4A;ATP2B3;LRP8		R-HSA-392852;R-HSA-418436;R-HSA-418309;R-HSA-392870;R-HSA-428961;R-HSA-432129;R-HSA-8948034;R-HSA-392143;R-HSA-392152;R-HSA-418456;R-HSA-392874;R-HSA-432121
R-HSA-5693606	DNA Double Strand Break Response	4	75	0.00525541	0.901833	0.901833	29	48	0.00353539	9606	Homo sapiens	HIST1H2BJ;EYA2;HIST1H2BG		R-HSA-5682967;R-HSA-5683735;R-HSA-69891;R-HSA-5682965;R-HSA-5683986;R-HSA-5682588;R-HSA-5683930;R-HSA-5682586;R-HSA-5683801;R-HSA-5682629;R-HSA-5683077;R-HSA-5693583;R-HSA-5683405;R-HSA-5682992;R-HSA-5693566;R-HSA-5683967;R-HSA-5683964;R-HSA-5683384;R-HSA-5683385;R-HSA-5682598;R-HSA-5682983;R-HSA-5693602;R-HSA-5693536;R-HSA-5683425;R-HSA-5682607;R-HSA-5682863;R-HSA-5693551;R-HSA-5693549;R-HSA-568…
R-HSA-179409	APC-Cdc20 mediated degradation of Nek2A	1	26	0.00182188	0.902218	0.902218	3	3	0.000220962	9606	Homo sapiens	UBE2E1		R-HSA-179410;R-HSA-179417;R-HSA-179421
R-HSA-202040	G-protein activation	1	26	0.00182188	0.902218	0.902218	5	6	0.000441924	9606	Homo sapiens	GNG4		R-HSA-167408;R-HSA-167429;R-HSA-167419;R-HSA-167433;R-HSA-112271
R-HSA-264642	Acetylcholine Neurotransmitter Release Cycle	1	26	0.00182188	0.902218	0.902218	2	6	0.000441924	9606	Homo sapiens	SNAP25		R-HSA-372529;R-HSA-372505
R-HSA-450321	JNK (c-Jun kinases) phosphorylation and activation mediated by activated human TAK1	1	26	0.00182188	0.902218	0.902218	1	3	0.000220962	9606	Homo sapiens	IRAK2		R-HSA-450337
R-HSA-198753	ERK/MAPK targets	1	26	0.00182188	0.902218	0.902218	1	7	0.000515578	9606	Homo sapiens	DUSP4		R-HSA-203797
R-HSA-111931	PKA-mediated phosphorylation of CREB	1	26	0.00182188	0.902218	0.902218	1	7	0.000515578	9606	Homo sapiens	ADCY2		R-HSA-111930
R-HSA-140837	Intrinsic Pathway of Fibrin Clot Formation	1	26	0.00182188	0.902218	0.902218	3	24	0.0017677	9606	Homo sapiens	F12		R-HSA-158357;R-HSA-158313;R-HSA-158300
R-HSA-210991	Basigin interactions	1	26	0.00182188	0.902218	0.902218	1	10	0.00073654	9606	Homo sapiens	SLC7A8		R-HSA-375131
R-HSA-9636383	Prevention of phagosomal-lysosomal fusion	1	26	0.00182188	0.902218	0.902218	1	11	0.000810194	9606	Homo sapiens	RAB5A		R-HSA-9636684
R-HSA-909733	Interferon alpha/beta signaling	12	186	0.0130334	0.902283	0.902283	2	22	0.00162039	9606	Homo sapiens	EGR1;IRF1;ISG15;IRF6;GBP2;ZNF225;IFIT3		R-HSA-1015702;R-HSA-1015699
R-HSA-9645723	Diseases of programmed cell death	5	90	0.0063065	0.903394	0.903394	1	28	0.00206231	9606	Homo sapiens	HIST1H2BJ;HIST1H2AD;HIST1H2BG;HIST1H3D		R-HSA-9710490
R-HSA-9696270	RND2 GTPase cycle	2	44	0.00308318	0.903586	0.903586	1	2	0.000147308	9606	Homo sapiens	ARHGAP1;EPHA2		R-HSA-9696266
R-HSA-381771	Synthesis, secretion, and inactivation of Glucagon-like Peptide-1 (GLP-1)	2	44	0.00308318	0.903586	0.903586	2	7	0.000515578	9606	Homo sapiens	GNAT3;PAX6		R-HSA-381799;R-HSA-383313
R-HSA-9662360	Sensory processing of sound by inner hair cells of the cochlea	4	76	0.00532549	0.907201	0.907201	2	7	0.000515578	9606	Homo sapiens	SNAP25;CACNA2D2;CABP1;SYP		R-HSA-9662096;R-HSA-9659515
R-HSA-8878166	Transcriptional regulation by RUNX2	9	147	0.0103006	0.907333	0.907333	14	84	0.00618693	9606	Homo sapiens	HDAC4;PSMC4;HAND2;DLX6;HEY2;HIVEP3;ITGA5;RUNX1		R-HSA-9007816;R-HSA-9008076;R-HSA-8938382;R-HSA-9008110;R-HSA-9008036;R-HSA-9007686;R-HSA-9008326;R-HSA-8939801;R-HSA-9007707;R-HSA-9008475;R-HSA-9008177;R-HSA-9009362;R-HSA-8939667;R-HSA-8939670
R-HSA-1168372	Downstream signaling events of B Cell Receptor (BCR)	5	91	0.00637657	0.908286	0.908286	10	15	0.00110481	9606	Homo sapiens	PSMC4;NFATC2;NFATC1;CARD11;NFKBIB		R-HSA-1168641;R-HSA-1168640;R-HSA-1168643;R-HSA-1168642;R-HSA-2025882;R-HSA-1168644;R-HSA-1168635;R-HSA-2025890;R-HSA-1168637;R-HSA-1168638
R-HSA-432722	Golgi Associated Vesicle Biogenesis	3	61	0.0042744	0.908945	0.908945	5	7	0.000515578	9606	Homo sapiens	VAMP8;AP1S3;TPD52L1		R-HSA-421831;R-HSA-421836;R-HSA-434362;R-HSA-421835;R-HSA-421833
R-HSA-168898	Toll-like Receptor Cascades	12	188	0.0131736	0.909287	0.909287	55	185	0.013626	9606	Homo sapiens	DNM3;DUSP4;BCAM;CTSO;IRAK2;FGG;PELI1;FOS;CD36;DNM1;NFKBIB;CTSB		R-HSA-975115;R-HSA-975879;R-HSA-975111;R-HSA-166286;R-HSA-936963;R-HSA-166284;R-HSA-936960;R-HSA-2559414;R-HSA-936991;R-HSA-8870678;R-HSA-450325;R-HSA-936986;R-HSA-203797;R-HSA-975122;R-HSA-8869667;R-HSA-975147;R-HSA-450337;R-HSA-975142;R-HSA-450346;R-HSA-975139;R-HSA-937022;R-HSA-450358;R-HSA-975160;R-HSA-166072;R-HSA-166082;R-HSA-937034;R-HSA-2201316;R-HSA-166091;R-HSA-2201322;R-HSA-168140;R-HS…
R-HSA-69002	DNA Replication Pre-Initiation	7	120	0.00840866	0.910097	0.910097	19	27	0.00198866	9606	Homo sapiens	HIST1H2BJ;PSMC4;ORC2;HIST1H2AD;HIST1H2BG;HIST1H3D		R-HSA-68960;R-HSA-68611;R-HSA-68610;R-HSA-68615;R-HSA-68940;R-HSA-176973;R-HSA-68849;R-HSA-68688;R-HSA-68595;R-HSA-68914;R-HSA-68917;R-HSA-68916;R-HSA-68919;R-HSA-68918;R-HSA-68825;R-HSA-9749197;R-HSA-68603;R-HSA-68826;R-HSA-9749098
R-HSA-2046106	alpha-linolenic acid (ALA) metabolism	2	45	0.00315325	0.910248	0.910248	3	15	0.00110481	9606	Homo sapiens	ELOVL2		R-HSA-2046090;R-HSA-2046088;R-HSA-2046100
R-HSA-167242	Abortive elongation of HIV-1 transcript in the absence of Tat	1	27	0.00189195	0.91059	0.91059	2	2	0.000147308	9606	Homo sapiens	SUPT5H		R-HSA-167147;R-HSA-167087
R-HSA-9725371	Nuclear events stimulated by ALK signaling in cancer	1	27	0.00189195	0.91059	0.91059	2	9	0.000662886	9606	Homo sapiens	STAT3		R-HSA-9701810;R-HSA-9725357
R-HSA-5627123	RHO GTPases activate PAKs	1	27	0.00189195	0.91059	0.91059	3	15	0.00110481	9606	Homo sapiens	MYH11		R-HSA-5668932;R-HSA-5668978;R-HSA-419232
R-HSA-450302	activated TAK1 mediates p38 MAPK activation	1	27	0.00189195	0.91059	0.91059	1	5	0.00036827	9606	Homo sapiens	IRAK2		R-HSA-450346
R-HSA-211958	Miscellaneous substrates	1	27	0.00189195	0.91059	0.91059	1	5	0.00036827	9606	Homo sapiens	CYP2S1		R-HSA-211874
R-HSA-5652084	Fructose metabolism	1	27	0.00189195	0.91059	0.91059	1	7	0.000515578	9606	Homo sapiens	ALDH1A1		R-HSA-6813749
R-HSA-193048	Androgen biosynthesis	1	27	0.00189195	0.91059	0.91059	1	9	0.000662886	9606	Homo sapiens	HSD17B3		R-HSA-193064
R-HSA-9671555	Signaling by PDGFR in disease	1	27	0.00189195	0.91059	0.91059	2	24	0.0017677	9606	Homo sapiens	STAT3		R-HSA-9672176;R-HSA-9672159
R-HSA-168138	Toll Like Receptor 9 (TLR9) Cascade	6	106	0.00742765	0.910839	0.910839	21	68	0.00500847	9606	Homo sapiens	DUSP4;BCAM;IRAK2;PELI1;FOS;NFKBIB		R-HSA-168166;R-HSA-975115;R-HSA-975147;R-HSA-450337;R-HSA-975142;R-HSA-975111;R-HSA-450346;R-HSA-975139;R-HSA-168140;R-HSA-450358;R-HSA-975103;R-HSA-975100;R-HSA-450292;R-HSA-450325;R-HSA-203797;R-HSA-975160;R-HSA-975097;R-HSA-9630923;R-HSA-168184;R-HSA-975122;R-HSA-975185
R-HSA-76002	Platelet activation, signaling and aggregation	20	293	0.0205311	0.91102	0.91102	57	116	0.00854386	9606	Homo sapiens	LYN;DAGLA;SERPINE1;F2R;FGG;PLA2G4A;PDGFA;CLU;ISLR;TG;GNG4;GNAT3;TMSB4X;ALB;FYN;PRKCQ;CD36;DGKI;RAPGEF3;PDK1		R-HSA-425861;R-HSA-392195;R-HSA-426240;R-HSA-418176;R-HSA-429441;R-HSA-396941;R-HSA-397835;R-HSA-939265;R-HSA-392202;R-HSA-481044;R-HSA-418581;R-HSA-418579;R-HSA-418576;R-HSA-354066;R-HSA-354073;R-HSA-418200;R-HSA-354087;R-HSA-428961;R-HSA-114600;R-HSA-377644;R-HSA-377641;R-HSA-377640;R-HSA-418091;R-HSA-2316429;R-HSA-377643;R-HSA-9708859;R-HSA-426032;R-HSA-453183;R-HSA-139842;R-HSA-396996;R-HSA-3…
R-HSA-76005	Response to elevated platelet cytosolic Ca2+	9	148	0.0103707	0.911133	0.911133	2	14	0.00103116	9606	Homo sapiens	ISLR;TG;TMSB4X;ALB;SERPINE1;FGG;PDGFA;CD36;CLU		R-HSA-481044;R-HSA-481007
R-HSA-3781865	Diseases of glycosylation	13	202	0.0141546	0.911603	0.911603	18	77	0.00567136	9606	Homo sapiens	SDC2;NOTCH4;BGN;THSD1;ADAMTS4;ADAMTS15;GAL;ADAMTSL4;ADAMTS18;CSPG4;GPC4;ADAMTS9;CHST3		R-HSA-3636919;R-HSA-4341669;R-HSA-9036289;R-HSA-3656254;R-HSA-9036290;R-HSA-4420365;R-HSA-3595175;R-HSA-3560804;R-HSA-9036283;R-HSA-3656261;R-HSA-3560802;R-HSA-9036285;R-HSA-3656257;R-HSA-5096538;R-HSA-6785565;R-HSA-3656267;R-HSA-3595178;R-HSA-3595176
R-HSA-1500620	Meiosis	5	92	0.00644664	0.912959	0.912959	8	15	0.00110481	9606	Homo sapiens	HIST1H2BJ;HIST1H2AD;HIST1H2BG;HIST1H3D		R-HSA-912408;R-HSA-912458;R-HSA-912503;R-HSA-912470;R-HSA-912496;R-HSA-912467;R-HSA-1214188;R-HSA-912450
R-HSA-5654736	Signaling by FGFR1	3	62	0.00434447	0.914481	0.914481	2	48	0.00353539	9606	Homo sapiens	SPRED2;FLRT2;FLRT3		R-HSA-5656064;R-HSA-5654510
R-HSA-375276	Peptide ligand-binding receptors	13	203	0.0142247	0.914773	0.914773	14	77	0.00567136	9606	Homo sapiens	GPR37;ANXA1;F2R;ECE1;GPR37L1;GRPR;SSTR3;EDNRA;GAL;F2RL1;ACKR3;PRLHR;PROK1		R-HSA-9731924;R-HSA-374758;R-HSA-374214;R-HSA-8876868;R-HSA-5336182;R-HSA-389026;R-HSA-5336184;R-HSA-391913;R-HSA-388855;R-HSA-389463;R-HSA-444691;R-HSA-388560;R-HSA-444476;R-HSA-375384
R-HSA-2132295	MHC class II antigen presentation	9	149	0.0104408	0.9148	0.9148	9	26	0.001915	9606	Homo sapiens	DNM3;KLC3;CTSO;CTSH;AP1S3;DNM1;CTSB		R-HSA-2130641;R-HSA-2213248;R-HSA-8951498;R-HSA-2130706;R-HSA-2130725;R-HSA-2213236;R-HSA-2130504;R-HSA-2130619;R-HSA-2130349
R-HSA-9648002	RAS processing	2	46	0.00322332	0.916476	0.916476	5	21	0.00154673	9606	Homo sapiens	PDE6D;PRKCQ		R-HSA-9654533;R-HSA-9654523;R-HSA-9653503;R-HSA-9656781;R-HSA-9654525
R-HSA-5213460	RIPK1-mediated regulated necrosis	2	46	0.00322332	0.916476	0.916476	5	34	0.00250424	9606	Homo sapiens	PELI1;TNFRSF10B		R-HSA-3465429;R-HSA-5675456;R-HSA-9686922;R-HSA-5213462;R-HSA-9686920
R-HSA-6806003	Regulation of TP53 Expression and Degradation	2	46	0.00322332	0.916476	0.916476	3	35	0.00257789	9606	Homo sapiens	USP2;PDK1		R-HSA-5689972;R-HSA-6795473;R-HSA-6805022
R-HSA-6802957	Oncogenic MAPK signaling	5	93	0.00651671	0.917422	0.917422	33	46	0.00338808	9606	Homo sapiens	CAMK2B;SPRED2;MRAS;FGG;DUSP9		R-HSA-6802919;R-HSA-9656211;R-HSA-6802918;R-HSA-9656209;R-HSA-9652816;R-HSA-6802916;R-HSA-9656215;R-HSA-6802914;R-HSA-6803234;R-HSA-9656214;R-HSA-6803233;R-HSA-6802912;R-HSA-9656212;R-HSA-6802927;R-HSA-6802926;R-HSA-6802925;R-HSA-6802924;R-HSA-6802922;R-HSA-6802921;R-HSA-6802935;R-HSA-6802934;R-HSA-6802933;R-HSA-6802932;R-HSA-6802943;R-HSA-6802942;R-HSA-6802941;R-HSA-9660538;R-HSA-9660536;R-HSA-6…
R-HSA-75067	Processing of Capped Intronless Pre-mRNA	1	28	0.00196202	0.918245	0.918245	4	10	0.00073654	9606	Homo sapiens	SNRPG;SNRPGP15		R-HSA-77585;R-HSA-77586;R-HSA-111437;R-HSA-111438
R-HSA-977068	Termination of O-glycan biosynthesis	1	28	0.00196202	0.918245	0.918245	2	5	0.00036827	9606	Homo sapiens	ST6GAL1		R-HSA-977071;R-HSA-977228
R-HSA-212676	Dopamine Neurotransmitter Release Cycle	1	28	0.00196202	0.918245	0.918245	2	5	0.00036827	9606	Homo sapiens	SNAP25		R-HSA-380869;R-HSA-380574
R-HSA-77387	Insulin receptor recycling	1	28	0.00196202	0.918245	0.918245	2	6	0.000441924	9606	Homo sapiens	ATP6V0C		R-HSA-74723;R-HSA-5252133
R-HSA-189085	Digestion of dietary carbohydrate	1	28	0.00196202	0.918245	0.918245	2	13	0.000957502	9606	Homo sapiens	ADAMTS4		R-HSA-189102;R-HSA-191116
R-HSA-879518	Transport of organic anions	1	28	0.00196202	0.918245	0.918245	1	9	0.000662886	9606	Homo sapiens	SLCO3A1		R-HSA-879584
R-HSA-200425	Carnitine metabolism	1	28	0.00196202	0.918245	0.918245	1	9	0.000662886	9606	Homo sapiens	PRKAG2		R-HSA-200423
R-HSA-2173788	Downregulation of TGF-beta receptor signaling	1	28	0.00196202	0.918245	0.918245	2	28	0.00206231	9606	Homo sapiens	EMB		R-HSA-2167924;R-HSA-178215
R-HSA-8964038	LDL clearance	1	28	0.00196202	0.918245	0.918245	1	19	0.00139943	9606	Homo sapiens	CES3		R-HSA-8937442
R-HSA-9013149	RAC1 GTPase cycle	12	191	0.0133838	0.919005	0.919005	4	6	0.000441924	9606	Homo sapiens	PREX2;DOCK11;DOCK3;SH3BP1;ABI2;WIPF1;ARHGDIB;WIPF3;ARHGAP1;PAK7;MPP7;EPHA2		R-HSA-9013145;R-HSA-9013144;R-HSA-9013147;R-HSA-9013143
R-HSA-9013406	RHOQ GTPase cycle	3	63	0.00441455	0.919708	0.919708	2	5	0.00036827	9606	Homo sapiens	GJA1;ARHGAP1;MPP7		R-HSA-9018745;R-HSA-9018746
R-HSA-9013106	RHOC GTPase cycle	4	79	0.0055357	0.921776	0.921776	2	6	0.000441924	9606	Homo sapiens	STK10;FMNL2;ARHGAP1;ARHGAP18		R-HSA-9013111;R-HSA-9013110
R-HSA-109606	Intrinsic Pathway for Apoptosis	3	64	0.00448462	0.924642	0.924642	5	62	0.00456655	9606	Homo sapiens	STAT3;BMF;UACA		R-HSA-508163;R-HSA-139908;R-HSA-139909;R-HSA-6804652;R-HSA-6790025
R-HSA-8854691	Interleukin-20 family signaling	1	29	0.00203209	0.925246	0.925246	26	56	0.00412462	9606	Homo sapiens	STAT3		R-HSA-8987080;R-HSA-8987150;R-HSA-8987214;R-HSA-8987266;R-HSA-8987141;R-HSA-8987014;R-HSA-8987270;R-HSA-8987097;R-HSA-8987161;R-HSA-8987033;R-HSA-8987096;R-HSA-9005340;R-HSA-8987230;R-HSA-8982163;R-HSA-6784765;R-HSA-8982162;R-HSA-8982165;R-HSA-6784763;R-HSA-8987156;R-HSA-8986985;R-HSA-8987052;R-HSA-8987104;R-HSA-8987236;R-HSA-8987070;R-HSA-8987255;R-HSA-8987063
R-HSA-167160	RNA Pol II CTD phosphorylation and interaction with CE during HIV infection	1	29	0.00203209	0.925246	0.925246	1	5	0.00036827	9606	Homo sapiens	SUPT5H		R-HSA-167153
R-HSA-77075	RNA Pol II CTD phosphorylation and interaction with CE	1	29	0.00203209	0.925246	0.925246	1	5	0.00036827	9606	Homo sapiens	SUPT5H		R-HSA-77073
R-HSA-5674400	Constitutive Signaling by AKT1 E17K in Cancer	1	29	0.00203209	0.925246	0.925246	2	18	0.00132577	9606	Homo sapiens	PDK1		R-HSA-2243937;R-HSA-2243942
R-HSA-194002	Glucocorticoid biosynthesis	1	29	0.00203209	0.925246	0.925246	1	9	0.000662886	9606	Homo sapiens	CYP21A2		R-HSA-193981
R-HSA-74182	Ketone body metabolism	1	29	0.00203209	0.925246	0.925246	1	11	0.000810194	9606	Homo sapiens	HMGCS1		R-HSA-73918
R-HSA-2219528	PI3K/AKT Signaling in Cancer	7	124	0.00868895	0.925427	0.925427	3	21	0.00154673	9606	Homo sapiens	ERBB3;NRG4;PDGFA;FYN;ESR2;PDK1		R-HSA-2243937;R-HSA-2243942;R-HSA-2400009
R-HSA-199992	trans-Golgi Network Vesicle Budding	4	80	0.00560577	0.926157	0.926157	11	19	0.00139943	9606	Homo sapiens	VAMP8;CTSZ;AP1S3;TPD52L1		R-HSA-421831;R-HSA-432706;R-HSA-432707;R-HSA-432688;R-HSA-376364;R-HSA-421836;R-HSA-5333658;R-HSA-434362;R-HSA-421835;R-HSA-432712;R-HSA-421833
R-HSA-8853884	Transcriptional Regulation by VENTX	2	48	0.00336346	0.927733	0.927733	3	13	0.000957502	9606	Homo sapiens	LEF1;UBE2E1		R-HSA-8853956;R-HSA-8853965;R-HSA-3790130
R-HSA-400508	Incretin synthesis, secretion, and inactivation	2	48	0.00336346	0.927733	0.927733	3	14	0.00103116	9606	Homo sapiens	GNAT3;PAX6		R-HSA-400500;R-HSA-381799;R-HSA-383313
R-HSA-112399	IRS-mediated signalling	3	65	0.00455469	0.929296	0.929296	5	9	0.000662886	9606	Homo sapiens	PDE3B;TRIB1;PDK1		R-HSA-109701;R-HSA-109700;R-HSA-109702;R-HSA-162363;R-HSA-162425
R-HSA-5621480	Dectin-2 family	3	65	0.00455469	0.929296	0.929296	2	12	0.000883848	9606	Homo sapiens	LYN;CLEC4M;FYN		R-HSA-8858500;R-HSA-5621355
R-HSA-438064	Post NMDA receptor activation events	5	96	0.00672693	0.929622	0.929622	12	39	0.0028725	9606	Homo sapiens	CAMK2B;GRIN2A;NEFL;PRKAG2;PDK1		R-HSA-445367;R-HSA-442725;R-HSA-9619542;R-HSA-9619478;R-HSA-442739;R-HSA-9612085;R-HSA-9619515;R-HSA-442732;R-HSA-9618750;R-HSA-9617583;R-HSA-442760;R-HSA-444792
R-HSA-211999	CYP2E1 reactions	1	30	0.00210217	0.931648	0.931648	6	6	0.000441924	9606	Homo sapiens	CYP2S1		R-HSA-76416;R-HSA-76354;R-HSA-76434;R-HSA-76475;R-HSA-76397;R-HSA-143468
R-HSA-428930	Thromboxane signalling through TP receptor	1	30	0.00210217	0.931648	0.931648	6	8	0.000589232	9606	Homo sapiens	GNG4		R-HSA-428918;R-HSA-428917;R-HSA-428752;R-HSA-428750;R-HSA-428909;R-HSA-428749
R-HSA-5357956	TNFR1-induced NFkappaB signaling pathway	1	30	0.00210217	0.931648	0.931648	2	5	0.00036827	9606	Homo sapiens	USP2		R-HSA-5357776;R-HSA-5357860
R-HSA-181430	Norepinephrine Neurotransmitter Release Cycle	1	30	0.00210217	0.931648	0.931648	2	6	0.000441924	9606	Homo sapiens	SNAP25		R-HSA-374899;R-HSA-374922
R-HSA-204174	Regulation of pyruvate dehydrogenase (PDH) complex	1	30	0.00210217	0.931648	0.931648	1	4	0.000294616	9606	Homo sapiens	PDK1		R-HSA-203946
R-HSA-6783589	Interleukin-6 family signaling	1	30	0.00210217	0.931648	0.931648	6	34	0.00250424	9606	Homo sapiens	STAT3		R-HSA-1112565;R-HSA-1112727;R-HSA-1112602;R-HSA-1112538;R-HSA-1112587;R-HSA-1112604
R-HSA-264876	Insulin processing	1	30	0.00210217	0.931648	0.931648	1	16	0.00117846	9606	Homo sapiens	MYRIP		R-HSA-9023171
R-HSA-201451	Signaling by BMP	1	30	0.00210217	0.931648	0.931648	1	17	0.00125212	9606	Homo sapiens	ACVRL1		R-HSA-8858369
R-HSA-9656223	Signaling by RAF1 mutants	2	49	0.00343354	0.932809	0.932809	5	7	0.000515578	9606	Homo sapiens	CAMK2B;FGG		R-HSA-9656211;R-HSA-9656209;R-HSA-9656215;R-HSA-9656214;R-HSA-9656212
R-HSA-5423646	Aflatoxin activation and detoxification	2	49	0.00343354	0.932809	0.932809	1	18	0.00132577	9606	Homo sapiens	GGT5;GGT6		R-HSA-5433072
R-HSA-388841	Costimulation by the CD28 family	5	97	0.006797	0.933317	0.933317	19	35	0.00257789	9606	Homo sapiens	LYN;FYN;TNFRSF14;TRIB1;PDK1		R-HSA-6790087;R-HSA-389381;R-HSA-2317314;R-HSA-389348;R-HSA-389158;R-HSA-389350;R-HSA-388833;R-HSA-388832;R-HSA-388814;R-HSA-389352;R-HSA-2316429;R-HSA-389354;R-HSA-389941;R-HSA-198640;R-HSA-389523;R-HSA-388829;R-HSA-389919;R-HSA-388831;R-HSA-198270
R-HSA-74752	Signaling by Insulin receptor	5	97	0.006797	0.933317	0.933317	10	34	0.00250424	9606	Homo sapiens	PDE3B;GRB10;TRIB1;ATP6V0C;PDK1		R-HSA-74707;R-HSA-74723;R-HSA-109701;R-HSA-74740;R-HSA-109700;R-HSA-5252133;R-HSA-109702;R-HSA-162363;R-HSA-110011;R-HSA-162425
R-HSA-1296041	Activation of G protein gated Potassium channels	1	31	0.00217224	0.937502	0.937502	3	3	0.000220962	9606	Homo sapiens	GNG4		R-HSA-1013020;R-HSA-1013013;R-HSA-1013012
R-HSA-997272	Inhibition of voltage gated Ca2+ channels via Gbeta/gamma subunits	1	31	0.00217224	0.937502	0.937502	3	3	0.000220962	9606	Homo sapiens	GNG4		R-HSA-1013020;R-HSA-1013013;R-HSA-1013012
R-HSA-1296059	G protein gated Potassium channels	1	31	0.00217224	0.937502	0.937502	3	3	0.000220962	9606	Homo sapiens	GNG4		R-HSA-1013020;R-HSA-1013013;R-HSA-1013012
R-HSA-3214842	HDMs demethylate histones	1	31	0.00217224	0.937502	0.937502	14	17	0.00125212	9606	Homo sapiens	HIST1H3D		R-HSA-4754187;R-HSA-4754176;R-HSA-5661116;R-HSA-5661114;R-HSA-4754181;R-HSA-5661115;R-HSA-3214912;R-HSA-4724284;R-HSA-5661122;R-HSA-5661123;R-HSA-5661120;R-HSA-5661121;R-HSA-4722133;R-HSA-4724279
R-HSA-5601884	PIWI-interacting RNA (piRNA) biogenesis	1	31	0.00217224	0.937502	0.937502	3	15	0.00110481	9606	Homo sapiens	HENMT1		R-HSA-5629237;R-HSA-5629203;R-HSA-5629218
R-HSA-1187000	Fertilization	1	31	0.00217224	0.937502	0.937502	1	9	0.000662886	9606	Homo sapiens	OVGP1		R-HSA-1297338
R-HSA-5218921	VEGFR2 mediated cell proliferation	1	31	0.00217224	0.937502	0.937502	1	12	0.000883848	9606	Homo sapiens	PDK1		R-HSA-5218821
R-HSA-400685	Sema4D in semaphorin signaling	1	31	0.00217224	0.937502	0.937502	1	13	0.000957502	9606	Homo sapiens	MYH11		R-HSA-419197
R-HSA-2453864	Retinoid cycle disease events	1	31	0.00217224	0.937502	0.937502	1	16	0.00117846	9606	Homo sapiens	STRA6		R-HSA-2453818
R-HSA-2474795	Diseases associated with visual transduction	1	31	0.00217224	0.937502	0.937502	1	17	0.00125212	9606	Homo sapiens	STRA6		R-HSA-2453818
R-HSA-9675143	Diseases of the neuronal system	1	31	0.00217224	0.937502	0.937502	1	17	0.00125212	9606	Homo sapiens	STRA6		R-HSA-2453818
R-HSA-186712	Regulation of beta-cell development	3	67	0.00469484	0.937821	0.937821	4	26	0.001915	9606	Homo sapiens	PAX6;NKX6-1		R-HSA-211350;R-HSA-211289;R-HSA-211272;R-HSA-210780
R-HSA-2559580	Oxidative Stress Induced Senescence	6	114	0.00798823	0.940311	0.940311	9	40	0.00294616	9606	Homo sapiens	HIST1H2BJ;HIST1H2AD;HIST1H2BG;FOS;HIST1H3D		R-HSA-3229089;R-HSA-3222593;R-HSA-3223200;R-HSA-450292;R-HSA-450325;R-HSA-3222546;R-HSA-3222533;R-HSA-3240295;R-HSA-3229102
R-HSA-75893	TNF signaling	2	51	0.00357368	0.941965	0.941965	5	32	0.00235693	9606	Homo sapiens	SMPD3;USP2		R-HSA-140978;R-HSA-5626981;R-HSA-5357776;R-HSA-5357845;R-HSA-5357860
R-HSA-5689901	Metalloprotease DUBs	1	32	0.00224231	0.942855	0.942855	2	6	0.000441924	9606	Homo sapiens	HIST1H2AD		R-HSA-5691381;R-HSA-5691411
R-HSA-210500	Glutamate Neurotransmitter Release Cycle	1	32	0.00224231	0.942855	0.942855	2	8	0.000589232	9606	Homo sapiens	SNAP25		R-HSA-210426;R-HSA-210430
R-HSA-70635	Urea cycle	1	32	0.00224231	0.942855	0.942855	1	8	0.000589232	9606	Homo sapiens	ASS1		R-HSA-70577
R-HSA-9637687	Suppression of phagosomal maturation	1	32	0.00224231	0.942855	0.942855	1	17	0.00125212	9606	Homo sapiens	RAB5A		R-HSA-9636684
R-HSA-69273	Cyclin A/B1/B2 associated events during G2/M transition	1	32	0.00224231	0.942855	0.942855	1	25	0.00184135	9606	Homo sapiens	EMB		R-HSA-170072
R-HSA-8986944	Transcriptional Regulation by MECP2	5	100	0.00700722	0.94338	0.94338	5	77	0.00567136	9606	Homo sapiens	CAMK2B;GRIN2A;DLL1		R-HSA-9006507;R-HSA-9006490;R-HSA-9006992;R-HSA-9023348;R-HSA-9023351
R-HSA-2428928	IRS-related events triggered by IGF1R	3	69	0.00483498	0.945387	0.945387	5	12	0.000883848	9606	Homo sapiens	PDE3B;TRIB1;PDK1		R-HSA-109701;R-HSA-109700;R-HSA-109702;R-HSA-162363;R-HSA-162425
R-HSA-445717	Aquaporin-mediated transport	3	69	0.00483498	0.945387	0.945387	7	25	0.00184135	9606	Homo sapiens	GNG4;AQP11;ADCY2		R-HSA-163617;R-HSA-432195;R-HSA-422320;R-HSA-507870;R-HSA-432188;R-HSA-164377;R-HSA-507868
R-HSA-1660499	Synthesis of PIPs at the plasma membrane	3	69	0.00483498	0.945387	0.945387	7	33	0.00243058	9606	Homo sapiens	PIP4K2A;PIP5K1B;RAB5A		R-HSA-8871366;R-HSA-1675773;R-HSA-1676145;R-HSA-1675776;R-HSA-1676082;R-HSA-1675810;R-HSA-1676134
R-HSA-450294	MAP kinase activation	3	69	0.00483498	0.945387	0.945387	5	32	0.00235693	9606	Homo sapiens	DUSP4;IRAK2;FOS		R-HSA-450292;R-HSA-450325;R-HSA-203797;R-HSA-450337;R-HSA-450346
R-HSA-4641262	Disassembly of the destruction complex and recruitment of AXIN to the membrane	1	33	0.00231238	0.947749	0.947749	4	7	0.000515578	9606	Homo sapiens	LRP5		R-HSA-201685;R-HSA-201691;R-HSA-1504186;R-HSA-201677
R-HSA-83936	Transport of nucleosides and free purine and pyrimidine bases across the plasma membrane	1	33	0.00231238	0.947749	0.947749	4	16	0.00117846	9606	Homo sapiens	SLC29A1		R-HSA-109536;R-HSA-109527;R-HSA-109529;R-HSA-109534
R-HSA-2161522	Abacavir transport and metabolism	1	33	0.00231238	0.947749	0.947749	1	10	0.00073654	9606	Homo sapiens	ABCB4		R-HSA-2161538
R-HSA-425410	Metal ion SLC transporters	1	33	0.00231238	0.947749	0.947749	1	20	0.00147308	9606	Homo sapiens	SLC39A8		R-HSA-442387
R-HSA-2173795	Downregulation of SMAD2/3:SMAD4 transcriptional activity	1	33	0.00231238	0.947749	0.947749	1	25	0.00184135	9606	Homo sapiens	SERPINE1		R-HSA-9736966
R-HSA-1660662	Glycosphingolipid metabolism	4	86	0.00602621	0.948098	0.948098	6	32	0.00235693	9606	Homo sapiens	SMPD3;UGCG;GAL;ARSG		R-HSA-1605624;R-HSA-1606312;R-HSA-1638104;R-HSA-1614362;R-HSA-1605724;R-HSA-1606273
R-HSA-168164	Toll Like Receptor 3 (TLR3) Cascade	5	102	0.00714736	0.949306	0.949306	9	61	0.00449289	9606	Homo sapiens	DUSP4;BCAM;IRAK2;FOS;NFKBIB		R-HSA-450292;R-HSA-450325;R-HSA-168166;R-HSA-203797;R-HSA-450337;R-HSA-9630923;R-HSA-168184;R-HSA-450346;R-HSA-168140
R-HSA-3214858	RMTs methylate histone arginines	2	53	0.00371383	0.949926	0.949926	12	22	0.00162039	9606	Homo sapiens	HIST1H2AD;HIST1H3D		R-HSA-5205822;R-HSA-5205820;R-HSA-5205867;R-HSA-5216234;R-HSA-5218952;R-HSA-5205799;R-HSA-5661117;R-HSA-5229203;R-HSA-5225602;R-HSA-5229010;R-HSA-5225649;R-HSA-5205824
R-HSA-2172127	DAP12 interactions	2	53	0.00371383	0.949926	0.949926	11	33	0.00243058	9606	Homo sapiens	FYN;KLRD1		R-HSA-2395412;R-HSA-2424484;R-HSA-210289;R-HSA-2424486;R-HSA-2424487;R-HSA-2424480;R-HSA-2396594;R-HSA-2424482;R-HSA-2395439;R-HSA-2395801;R-HSA-2172126
R-HSA-432040	Vasopressin regulates renal water homeostasis via Aquaporins	2	53	0.00371383	0.949926	0.949926	5	15	0.00110481	9606	Homo sapiens	GNG4;ADCY2		R-HSA-163617;R-HSA-432195;R-HSA-422320;R-HSA-432188;R-HSA-164377
R-HSA-9659379	Sensory processing of sound	4	87	0.00609628	0.951112	0.951112	2	13	0.000957502	9606	Homo sapiens	SNAP25;CACNA2D2;CABP1;SYP		R-HSA-9662096;R-HSA-9659515
R-HSA-170834	Signaling by TGF-beta Receptor Complex	4	87	0.00609628	0.951112	0.951112	11	88	0.00648155	9606	Homo sapiens	SERPINE1;EMB;F11R		R-HSA-9736966;R-HSA-2160931;R-HSA-2160932;R-HSA-2134532;R-HSA-2167924;R-HSA-178215;R-HSA-2160935;R-HSA-2134519;R-HSA-2134506;R-HSA-2106586;R-HSA-9736959
R-HSA-168643	Nucleotide-binding domain, leucine rich repeat containing receptor (NLR) signaling pathways	3	71	0.00497512	0.95209	0.95209	5	46	0.00338808	9606	Homo sapiens	IRAK2;CASP4;CASP1		R-HSA-844617;R-HSA-844618;R-HSA-844612;R-HSA-168184;R-HSA-622420
R-HSA-9619483	Activation of AMPK downstream of NMDARs	1	34	0.00238245	0.952225	0.952225	3	3	0.000220962	9606	Homo sapiens	PRKAG2		R-HSA-9619542;R-HSA-9619478;R-HSA-9619515
R-HSA-8850843	Phosphate bond hydrolysis by NTPDase proteins	1	34	0.00238245	0.952225	0.952225	2	12	0.000883848	9606	Homo sapiens	ENTPD8		R-HSA-8851538;R-HSA-8851550
R-HSA-622312	Inflammasomes	1	34	0.00238245	0.952225	0.952225	3	28	0.00206231	9606	Homo sapiens	CASP1		R-HSA-844617;R-HSA-844618;R-HSA-844612
R-HSA-8940973	RUNX2 regulates osteoblast differentiation	1	34	0.00238245	0.952225	0.952225	1	24	0.0017677	9606	Homo sapiens	HEY2		R-HSA-9008177
R-HSA-112314	Neurotransmitter receptors and postsynaptic signal transmission	14	232	0.0162567	0.952548	0.952548	55	109	0.00802828	9606	Homo sapiens	CAMK2B;PRKAG2;GRIK4;ADCY2;GRIK2;KIF17;GRIN2A;GNAL;GNG4;GNAT3;NEFL;PDK1;GRIA4		R-HSA-9609746;R-HSA-9611030;R-HSA-9619478;R-HSA-421007;R-HSA-392206;R-HSA-9610270;R-HSA-442760;R-HSA-9610653;R-HSA-9610627;R-HSA-1013020;R-HSA-438037;R-HSA-9609738;R-HSA-1013013;R-HSA-1013012;R-HSA-9609742;R-HSA-9610802;R-HSA-432164;R-HSA-432162;R-HSA-9612085;R-HSA-170666;R-HSA-9619515;R-HSA-432172;R-HSA-9618750;R-HSA-170671;R-HSA-170674;R-HSA-445367;R-HSA-9610408;R-HSA-170686;R-HSA-9617326;R-HSA…
R-HSA-6802946	Signaling by moderate kinase activity BRAF mutants	2	54	0.0037839	0.953505	0.953505	5	7	0.000515578	9606	Homo sapiens	CAMK2B;FGG		R-HSA-6802919;R-HSA-6802916;R-HSA-6802914;R-HSA-6803230;R-HSA-6802921
R-HSA-6802955	Paradoxical activation of RAF signaling by kinase inactive BRAF	2	54	0.0037839	0.953505	0.953505	5	7	0.000515578	9606	Homo sapiens	CAMK2B;FGG		R-HSA-6802918;R-HSA-6803234;R-HSA-6802943;R-HSA-6802942;R-HSA-6802941
R-HSA-9649948	Signaling downstream of RAS mutants	2	54	0.0037839	0.953505	0.953505	5	7	0.000515578	9606	Homo sapiens	CAMK2B;FGG		R-HSA-6803233;R-HSA-6802926;R-HSA-6802925;R-HSA-6802924;R-HSA-6802922
R-HSA-6802949	Signaling by RAS mutants	2	54	0.0037839	0.953505	0.953505	5	9	0.000662886	9606	Homo sapiens	CAMK2B;FGG		R-HSA-6803233;R-HSA-6802926;R-HSA-6802925;R-HSA-6802924;R-HSA-6802922
R-HSA-169911	Regulation of Apoptosis	2	54	0.0037839	0.953505	0.953505	2	5	0.00036827	9606	Homo sapiens	PSMC4;DNM1		R-HSA-211715;R-HSA-8867344
R-HSA-2672351	Stimuli-sensing channels	6	119	0.00833859	0.953987	0.953987	6	28	0.00206231	9606	Homo sapiens	ANO1;SCNN1A;TRPV2;TRPV3;MCOLN2;RYR3		R-HSA-9659568;R-HSA-2682349;R-HSA-2672334;R-HSA-2855020;R-HSA-3295579;R-HSA-2684901
R-HSA-5668541	TNFR2 non-canonical NF-kB pathway	5	104	0.00728751	0.954664	0.954664	12	43	0.00316712	9606	Homo sapiens	PSMC4;TNFSF4;TNFRSF14;TNFRSF1B		R-HSA-5668534;R-HSA-5668454;R-HSA-5668404;R-HSA-5668467;R-HSA-5607731;R-HSA-5668481;R-HSA-5668417;R-HSA-5668414;R-HSA-5675948;R-HSA-5692315;R-HSA-5668520;R-HSA-5669097
R-HSA-1234176	Oxygen-dependent proline hydroxylation of Hypoxia-inducible Factor Alpha	3	72	0.0050452	0.955146	0.955146	12	12	0.000883848	9606	Homo sapiens	EGLN3;PSMC4;EPAS1		R-HSA-1234163;R-HSA-1234179;R-HSA-1234177;R-HSA-1234166;R-HSA-1234183;R-HSA-1234165;R-HSA-1234181;R-HSA-1234169;R-HSA-1234175;R-HSA-1234159;R-HSA-1234172;R-HSA-1234173
R-HSA-1169091	Activation of NF-kappaB in B cells	3	72	0.0050452	0.955146	0.955146	8	10	0.00073654	9606	Homo sapiens	PSMC4;CARD11;NFKBIB		R-HSA-1168641;R-HSA-1168640;R-HSA-1168643;R-HSA-1168642;R-HSA-1168644;R-HSA-1168635;R-HSA-1168637;R-HSA-1168638
R-HSA-2428924	IGF1R signaling cascade	3	72	0.0050452	0.955146	0.955146	5	17	0.00125212	9606	Homo sapiens	PDE3B;TRIB1;PDK1		R-HSA-109701;R-HSA-109700;R-HSA-109702;R-HSA-162363;R-HSA-162425
R-HSA-109581	Apoptosis	11	192	0.0134539	0.955338	0.955338	17	141	0.0103852	9606	Homo sapiens	PSMC4;UNC5B;STAT3;GAS2;TNFRSF10B;PRKCQ;BMF;UACA;DNM1;HIST1H1C		R-HSA-201603;R-HSA-211715;R-HSA-418852;R-HSA-201639;R-HSA-211239;R-HSA-508163;R-HSA-139908;R-HSA-141156;R-HSA-418849;R-HSA-139909;R-HSA-6804652;R-HSA-211247;R-HSA-3371359;R-HSA-6790025;R-HSA-139952;R-HSA-8867344;R-HSA-3465448
R-HSA-8878171	Transcriptional regulation by RUNX1	16	261	0.0182888	0.955725	0.955725	126	132	0.00972232	9606	Homo sapiens	H19;CTSO;HIST1H2BJ;PSMC4;MYB;HIST1H2AD;NFATC2;PRKCQ;HIST1H2BG;PAX5;HIST1H3D;RUNX1		R-HSA-8936584;R-HSA-8937097;R-HSA-8938121;R-HSA-8931981;R-HSA-8938382;R-HSA-8936068;R-HSA-8938887;R-HSA-8877192;R-HSA-8956568;R-HSA-8937113;R-HSA-8937118;R-HSA-8938389;R-HSA-8936599;R-HSA-8936616;R-HSA-8956586;R-HSA-8936621;R-HSA-8938158;R-HSA-8955822;R-HSA-8937134;R-HSA-8936608;R-HSA-8938913;R-HSA-8877485;R-HSA-8938150;R-HSA-8935864;R-HSA-8938938;R-HSA-8877493;R-HSA-8877490;R-HSA-8938174;R-HSA-8…
R-HSA-422475	Axon guidance	41	585	0.0409922	0.955931	0.955931	156	298	0.0219489	9606	Homo sapiens	RET;GRB7;EPHA10;SDC2;GSPT2;CACNA1G;RELN;CHL1;FLRT3;CLTCL1;PAK7;GRB10;ST8SIA4;FYN;MYH11;NRCAM;SLIT3;SCN1B;EPHB3;LYN;SEMA6A;CNTN6;UNC5B;UNC5C;DNM1;DNM3;COL3A1;NFASC;COL2A1;EFNA2;COL5A1;LHX2;PSMC4;ITGA10;PLXNB3;CNTN2;COL9A3;PRKCQ;ITGA5;EPHA2		R-HSA-525833;R-HSA-3928633;R-HSA-9011083;R-HSA-3928632;R-HSA-3928639;R-HSA-3928627;R-HSA-3928625;R-HSA-3928624;R-HSA-9011074;R-HSA-3928631;R-HSA-9011077;R-HSA-3928628;R-HSA-3928617;R-HSA-3928616;R-HSA-3928623;R-HSA-3928610;R-HSA-622357;R-HSA-3928615;R-HSA-3928614;R-HSA-3928612;R-HSA-3928602;R-HSA-3928601;R-HSA-3928600;R-HSA-3928607;R-HSA-418850;R-HSA-3928604;R-HSA-3928595;R-HSA-418863;R-HSA-39285…
R-HSA-9006335	Signaling by Erythropoietin	1	35	0.00245253	0.956318	0.956318	24	24	0.0017677	9606	Homo sapiens	LYN		R-HSA-9027273;R-HSA-9027272;R-HSA-9027275;R-HSA-9012651;R-HSA-9027274;R-HSA-9012650;R-HSA-9027373;R-HSA-9012654;R-HSA-9027425;R-HSA-9029155;R-HSA-9029158;R-HSA-9021627;R-HSA-9029149;R-HSA-9006332;R-HSA-9029151;R-HSA-9032478;R-HSA-9029150;R-HSA-9027281;R-HSA-9012657;R-HSA-9027280;R-HSA-9024723;R-HSA-9006323;R-HSA-9006325;R-HSA-9024726
R-HSA-72086	mRNA Capping	1	35	0.00245253	0.956318	0.956318	7	11	0.000810194	9606	Homo sapiens	SUPT5H		R-HSA-77073;R-HSA-77090;R-HSA-77077;R-HSA-77078;R-HSA-77081;R-HSA-77083;R-HSA-77085
R-HSA-5656169	Termination of translesion DNA synthesis	1	35	0.00245253	0.956318	0.956318	5	9	0.000662886	9606	Homo sapiens	ISG15		R-HSA-5653766;R-HSA-5653780;R-HSA-5653786;R-HSA-5653754;R-HSA-5653770
R-HSA-420092	Glucagon-type ligand receptors	1	35	0.00245253	0.956318	0.956318	1	8	0.000589232	9606	Homo sapiens	GNG4		R-HSA-381612
R-HSA-418360	Platelet calcium homeostasis	1	35	0.00245253	0.956318	0.956318	1	8	0.000589232	9606	Homo sapiens	ATP2B3		R-HSA-418309
R-HSA-199220	Vitamin B5 (pantothenate) metabolism	1	35	0.00245253	0.956318	0.956318	1	12	0.000883848	9606	Homo sapiens	ENPP2		R-HSA-8938314
R-HSA-211000	Gene Silencing by RNA	6	120	0.00840866	0.956357	0.956357	4	40	0.00294616	9606	Homo sapiens	HENMT1;HIST1H2BJ;HIST1H2AD;HIST1H2BG;HIST1H3D		R-HSA-5629237;R-HSA-5578742;R-HSA-5629203;R-HSA-5629218
R-HSA-2046104	alpha-linolenic (omega3) and linoleic (omega6) acid metabolism	2	55	0.00385397	0.956838	0.956838	6	25	0.00184135	9606	Homo sapiens	ELOVL2		R-HSA-2046095;R-HSA-2046094;R-HSA-2046090;R-HSA-2046088;R-HSA-2046100;R-HSA-2046083
R-HSA-437239	Recycling pathway of L1	2	55	0.00385397	0.956838	0.956838	1	14	0.00103116	9606	Homo sapiens	DNM3;DNM1		R-HSA-555065
R-HSA-2404192	Signaling by Type 1 Insulin-like Growth Factor 1 Receptor (IGF1R)	3	73	0.00511527	0.958018	0.958018	5	19	0.00139943	9606	Homo sapiens	PDE3B;TRIB1;PDK1		R-HSA-109701;R-HSA-109700;R-HSA-109702;R-HSA-162363;R-HSA-162425
R-HSA-68962	Activation of the pre-replicative complex	1	36	0.0025226	0.96006	0.96006	7	9	0.000662886	9606	Homo sapiens	ORC2		R-HSA-68960;R-HSA-68914;R-HSA-68917;R-HSA-68916;R-HSA-68919;R-HSA-68918;R-HSA-68940
R-HSA-9687139	Aberrant regulation of mitotic cell cycle due to RB1 defects	1	36	0.0025226	0.96006	0.96006	1	3	0.000220962	9606	Homo sapiens	UBE2E1		R-HSA-9687377
R-HSA-549127	Organic cation transport	1	36	0.0025226	0.96006	0.96006	1	9	0.000662886	9606	Homo sapiens	RUNX1		R-HSA-549241
R-HSA-114452	Activation of BH3-only proteins	1	36	0.0025226	0.96006	0.96006	2	19	0.00139943	9606	Homo sapiens	BMF		R-HSA-139908;R-HSA-139909
R-HSA-2206281	Mucopolysaccharidoses	1	36	0.0025226	0.96006	0.96006	2	22	0.00162039	9606	Homo sapiens	GAL		R-HSA-9036061;R-HSA-2265534
R-HSA-9694548	Maturation of spike protein	1	36	0.0025226	0.96006	0.96006	1	11	0.000810194	9606	Homo sapiens	ST6GAL1		R-HSA-9697018
R-HSA-2173789	TGF-beta receptor signaling activates SMADs	1	36	0.0025226	0.96006	0.96006	2	39	0.0028725	9606	Homo sapiens	EMB		R-HSA-2167924;R-HSA-178215
R-HSA-382556	ABC-family proteins mediated transport	6	122	0.00854881	0.960766	0.960766	8	27	0.00198866	9606	Homo sapiens	PSMC4;ABCB4;DERL3;ABCC9		R-HSA-8866551;R-HSA-1454916;R-HSA-5678261;R-HSA-5678706;R-HSA-8866546;R-HSA-1467457;R-HSA-8866542;R-HSA-8866553
R-HSA-937061	TRIF(TICAM1)-mediated TLR4 signaling	5	107	0.00749772	0.961736	0.961736	10	58	0.00427193	9606	Homo sapiens	DUSP4;BCAM;IRAK2;FOS;NFKBIB		R-HSA-450358;R-HSA-450292;R-HSA-450325;R-HSA-168166;R-HSA-203797;R-HSA-450337;R-HSA-9630923;R-HSA-168184;R-HSA-450346;R-HSA-168140
R-HSA-166166	MyD88-independent TLR4 cascade	5	107	0.00749772	0.961736	0.961736	10	60	0.00441924	9606	Homo sapiens	DUSP4;BCAM;IRAK2;FOS;NFKBIB		R-HSA-450358;R-HSA-450292;R-HSA-450325;R-HSA-168166;R-HSA-203797;R-HSA-450337;R-HSA-9630923;R-HSA-168184;R-HSA-450346;R-HSA-168140
R-HSA-1474165	Reproduction	6	123	0.00861888	0.962816	0.962816	9	24	0.0017677	9606	Homo sapiens	OVGP1;HIST1H2BJ;HIST1H2AD;HIST1H2BG;HIST1H3D		R-HSA-912408;R-HSA-912458;R-HSA-1297338;R-HSA-912503;R-HSA-912470;R-HSA-912496;R-HSA-912467;R-HSA-1214188;R-HSA-912450
R-HSA-9604323	Negative regulation of NOTCH4 signaling	2	57	0.00399411	0.962831	0.962831	6	6	0.000441924	9606	Homo sapiens	PSMC4;NOTCH4		R-HSA-9604642;R-HSA-9604387;R-HSA-9604675;R-HSA-9604629;R-HSA-9604328;R-HSA-9604606
R-HSA-5620920	Cargo trafficking to the periciliary membrane	2	57	0.00399411	0.962831	0.962831	6	27	0.00198866	9606	Homo sapiens	PDE6D;SSTR3		R-HSA-5624956;R-HSA-5624127;R-HSA-5638012;R-HSA-5624126;R-HSA-5624953;R-HSA-5624954
R-HSA-2173793	Transcriptional activity of SMAD2/SMAD3:SMAD4 heterotrimer	2	57	0.00399411	0.962831	0.962831	3	44	0.00324077	9606	Homo sapiens	SERPINE1		R-HSA-9736966;R-HSA-2106586;R-HSA-9736959
R-HSA-203615	eNOS activation	1	37	0.00259267	0.963482	0.963482	15	20	0.00147308	9606	Homo sapiens	NOS3		R-HSA-202144;R-HSA-203712;R-HSA-1497810;R-HSA-202127;R-HSA-203567;R-HSA-1497784;R-HSA-1497796;R-HSA-202129;R-HSA-203700;R-HSA-202132;R-HSA-203611;R-HSA-202137;R-HSA-202111;R-HSA-202110;R-HSA-203613
R-HSA-113418	Formation of the Early Elongation Complex	1	37	0.00259267	0.963482	0.963482	2	3	0.000220962	9606	Homo sapiens	SUPT5H		R-HSA-113402;R-HSA-113407
R-HSA-167158	Formation of the HIV-1 Early Elongation Complex	1	37	0.00259267	0.963482	0.963482	3	5	0.00036827	9606	Homo sapiens	SUPT5H		R-HSA-167478;R-HSA-167083;R-HSA-167085
R-HSA-5694530	Cargo concentration in the ER	1	37	0.00259267	0.963482	0.963482	2	12	0.000883848	9606	Homo sapiens	CTSZ		R-HSA-5694428;R-HSA-5694522
R-HSA-1474151	Tetrahydrobiopterin (BH4) synthesis, recycling, salvage and regulation	1	37	0.00259267	0.963482	0.963482	2	16	0.00117846	9606	Homo sapiens	NOS3		R-HSA-1497796;R-HSA-1497784
R-HSA-6785807	Interleukin-4 and Interleukin-13 signaling	12	211	0.0147852	0.963825	0.963825	21	47	0.00346174	9606	Homo sapiens	ANXA1;TG;CEBPD;STAT3;CD36;FOS;TNFRSF1B		R-HSA-6785895;R-HSA-6788582;R-HSA-6790022;R-HSA-6786095;R-HSA-6788623;R-HSA-6789615;R-HSA-6788622;R-HSA-6790029;R-HSA-6786124;R-HSA-6790025;R-HSA-6789960;R-HSA-6790038;R-HSA-6786293;R-HSA-6788628;R-HSA-6790036;R-HSA-6797267;R-HSA-6786097;R-HSA-6797245;R-HSA-6788571;R-HSA-6790041;R-HSA-6786072
R-HSA-9013694	Signaling by NOTCH4	4	92	0.00644664	0.963907	0.963907	20	20	0.00147308	9606	Homo sapiens	PSMC4;NOTCH4;HEY2		R-HSA-9604247;R-HSA-9604471;R-HSA-9604308;R-HSA-9013711;R-HSA-9604629;R-HSA-9604664;R-HSA-9604606;R-HSA-9604446;R-HSA-9604642;R-HSA-9604387;R-HSA-9604675;R-HSA-9604451;R-HSA-9604550;R-HSA-9013693;R-HSA-9605414;R-HSA-9604294;R-HSA-9604328;R-HSA-9604264;R-HSA-2168987;R-HSA-9604553
R-HSA-9020702	Interleukin-1 signaling	5	109	0.00763787	0.965873	0.965873	11	47	0.00346174	9606	Homo sapiens	BCAM;IRAK2;PSMC4;PELI1;NFKBIB		R-HSA-450690;R-HSA-168166;R-HSA-209061;R-HSA-8948063;R-HSA-9630923;R-HSA-8948066;R-HSA-446684;R-HSA-168184;R-HSA-451418;R-HSA-450827;R-HSA-168140
R-HSA-450531	Regulation of mRNA stability by proteins that bind AU-rich elements	4	93	0.00651671	0.96606	0.96606	3	26	0.001915	9606	Homo sapiens	ANP32A;PSMC4;ENPP2;EMB		R-HSA-450466;R-HSA-450595;R-HSA-450387
R-HSA-381119	Unfolded Protein Response (UPR)	8	155	0.0108612	0.966331	0.966331	13	94	0.00692347	9606	Homo sapiens	CHL1;CREB3L1;JMJD7-PLA2G4B;CABP1;ATF3;MBTPS2		R-HSA-1791131;R-HSA-8874212;R-HSA-1791071;R-HSA-8874187;R-HSA-8874184;R-HSA-8874195;R-HSA-420818;R-HSA-8874194;R-HSA-8874193;R-HSA-1791116;R-HSA-8874192;R-HSA-8874201;R-HSA-1791173
R-HSA-9675126	Diseases of mitotic cell cycle	1	38	0.00266274	0.966611	0.966611	1	5	0.00036827	9606	Homo sapiens	UBE2E1		R-HSA-9687377
R-HSA-448424	Interleukin-17 signaling	3	77	0.00539556	0.967869	0.967869	5	35	0.00257789	9606	Homo sapiens	DUSP4;IRAK2;FOS		R-HSA-450292;R-HSA-450325;R-HSA-203797;R-HSA-450337;R-HSA-450346
R-HSA-68827	CDT1 association with the CDC6:ORC:origin complex	2	59	0.00413426	0.96802	0.96802	2	3	0.000220962	9606	Homo sapiens	PSMC4;ORC2		R-HSA-68825;R-HSA-68826
R-HSA-3371571	HSF1-dependent transactivation	2	59	0.00413426	0.96802	0.96802	2	8	0.000589232	9606	Homo sapiens	CAMK2B;HSPB8		R-HSA-5082356;R-HSA-5082387
R-HSA-8939243	RUNX1 interacts with co-factors whose precise effect on RUNX1 targets is not known	1	39	0.00273281	0.969472	0.969472	5	5	0.00036827	9606	Homo sapiens	RUNX1		R-HSA-8878054;R-HSA-8938217;R-HSA-8878050;R-HSA-8937989;R-HSA-8878056
R-HSA-167243	Tat-mediated HIV elongation arrest and recovery	1	39	0.00273281	0.969472	0.969472	3	3	0.000220962	9606	Homo sapiens	SUPT5H		R-HSA-167090;R-HSA-167459;R-HSA-167148
R-HSA-167238	Pausing and recovery of Tat-mediated HIV elongation	1	39	0.00273281	0.969472	0.969472	2	2	0.000147308	9606	Homo sapiens	SUPT5H		R-HSA-167076;R-HSA-167150
R-HSA-9013424	RHOV GTPase cycle	1	39	0.00273281	0.969472	0.969472	1	2	0.000147308	9606	Homo sapiens	EPHA2		R-HSA-9018794
R-HSA-176187	Activation of ATR in response to replication stress	1	39	0.00273281	0.969472	0.969472	2	9	0.000662886	9606	Homo sapiens	ORC2		R-HSA-176298;R-HSA-176318
R-HSA-9022692	Regulation of MECP2 expression and activity	1	39	0.00273281	0.969472	0.969472	1	14	0.00103116	9606	Homo sapiens	CAMK2B		R-HSA-9006992
R-HSA-1839124	FGFR1 mutant receptor activation	1	39	0.00273281	0.969472	0.969472	1	25	0.00184135	9606	Homo sapiens	STAT3		R-HSA-1888198
R-HSA-1834949	Cytosolic sensors of pathogen-associated DNA	3	78	0.00546563	0.969966	0.969966	8	50	0.0036827	9606	Homo sapiens	NLRP4;NLRC3;NFKBIB		R-HSA-1834939;R-HSA-3249392;R-HSA-2396007;R-HSA-8948703;R-HSA-3249386;R-HSA-8948709;R-HSA-168140;R-HSA-1606327
R-HSA-381038	XBP1(S) activates chaperone genes	4	95	0.00665686	0.970012	0.970012	3	47	0.00346174	9606	Homo sapiens	CHL1;JMJD7-PLA2G4B;CABP1		R-HSA-1791131;R-HSA-1791071;R-HSA-1791116
R-HSA-4420097	VEGFA-VEGFR2 Pathway	6	127	0.00889917	0.970072	0.970072	25	79	0.00581866	9606	Homo sapiens	ABI2;NOS3;AXL;FYN;TRIB1;PDK1		R-HSA-5218824;R-HSA-2029465;R-HSA-5218821;R-HSA-5218819;R-HSA-202127;R-HSA-5218847;R-HSA-202129;R-HSA-202137;R-HSA-5218832;R-HSA-2317314;R-HSA-202144;R-HSA-5357429;R-HSA-5357432;R-HSA-5218854;R-HSA-2316429;R-HSA-1497784;R-HSA-5218814;R-HSA-5218812;R-HSA-198640;R-HSA-5357479;R-HSA-5218806;R-HSA-5218804;R-HSA-202111;R-HSA-198270;R-HSA-202110
R-HSA-2980736	Peptide hormone metabolism	6	127	0.00889917	0.970072	0.970072	8	63	0.0046402	9606	Homo sapiens	CPA3;MME;GNAT3;CTSZ;PAX6;MYRIP		R-HSA-400500;R-HSA-381799;R-HSA-2022396;R-HSA-2022381;R-HSA-383313;R-HSA-2028294;R-HSA-9023171;R-HSA-2022368
R-HSA-5339562	Uptake and actions of bacterial toxins	2	60	0.00420433	0.970346	0.970346	15	66	0.00486116	9606	Homo sapiens	SNAP25;SV2A		R-HSA-194818;R-HSA-5244500;R-HSA-5244503;R-HSA-5250616;R-HSA-5244506;R-HSA-194793;R-HSA-5250875;R-HSA-5244415;R-HSA-5250880;R-HSA-194800;R-HSA-5250884;R-HSA-5244424;R-HSA-5250600;R-HSA-5244428;R-HSA-5250607
R-HSA-5683057	MAPK family signaling cascades	24	380	0.0266274	0.970849	0.970849	36	122	0.00898578	9606	Homo sapiens	RET;CAMK2B;DUSP4;DUSP5;FGG;PDGFA;ETV4;DUSP9;SPRED2;MRAS;ERBB3;NRG4;PSMC4;PDE6D;NEFL;FYN;PRKCQ;TEK;EMB;MAPK4;RAG1		R-HSA-5672980;R-HSA-5672978;R-HSA-5687120;R-HSA-5658438;R-HSA-9657603;R-HSA-5687109;R-HSA-5672965;R-HSA-5658435;R-HSA-9657606;R-HSA-5687107;R-HSA-9654533;R-HSA-5687105;R-HSA-5672972;R-HSA-5672973;R-HSA-9657608;R-HSA-9658445;R-HSA-5687112;R-HSA-9656781;R-HSA-5672969;R-HSA-5687094;R-HSA-5658231;R-HSA-5687091;R-HSA-5675376;R-HSA-5692785;R-HSA-5658430;R-HSA-9654523;R-HSA-9653503;R-HSA-9657599;R-HSA-5…
R-HSA-447115	Interleukin-12 family signaling	4	96	0.00672693	0.971823	0.971823	24	114	0.00839655	9606	Homo sapiens	ANXA2;STAT3;IL27RA		R-HSA-8950537;R-HSA-8950441;R-HSA-8950733;R-HSA-8984012;R-HSA-8952749;R-HSA-8950766;R-HSA-8984014;R-HSA-8984001;R-HSA-8950210;R-HSA-8950724;R-HSA-8950340;R-HSA-448427;R-HSA-8950780;R-HSA-8950716;R-HSA-8950269;R-HSA-8950782;R-HSA-8950271;R-HSA-8950480;R-HSA-8984021;R-HSA-8950485;R-HSA-8984023;R-HSA-8950518;R-HSA-8950583;R-HSA-8952823
R-HSA-167287	HIV elongation arrest and recovery	1	40	0.00280289	0.972088	0.972088	3	3	0.000220962	9606	Homo sapiens	SUPT5H		R-HSA-167284;R-HSA-167288;R-HSA-167481
R-HSA-167290	Pausing and recovery of HIV elongation	1	40	0.00280289	0.972088	0.972088	2	2	0.000147308	9606	Homo sapiens	SUPT5H		R-HSA-167282;R-HSA-167292
R-HSA-390471	Association of TriC/CCT with target proteins during biosynthesis	1	40	0.00280289	0.972088	0.972088	1	2	0.000147308	9606	Homo sapiens	STAT3		R-HSA-390470
R-HSA-189483	Heme degradation	1	40	0.00280289	0.972088	0.972088	2	22	0.00162039	9606	Homo sapiens	ALB		R-HSA-9661425;R-HSA-9661432
R-HSA-4090294	SUMOylation of intracellular receptors	1	40	0.00280289	0.972088	0.972088	2	25	0.00184135	9606	Homo sapiens	HDAC4		R-HSA-4720446;R-HSA-4720432
R-HSA-192105	Synthesis of bile acids and bile salts	5	113	0.00791816	0.972936	0.972936	14	83	0.00611328	9606	Homo sapiens	ACOX2;AKR1C1;CYP7B1;PPIL3		R-HSA-192160;R-HSA-192065;R-HSA-192097;R-HSA-191972;R-HSA-192036;R-HSA-193800;R-HSA-192335;R-HSA-192051;R-HSA-193841;R-HSA-193781;R-HSA-193816;R-HSA-193369;R-HSA-193758;R-HSA-193789
R-HSA-1660661	Sphingolipid de novo biosynthesis	3	80	0.00560577	0.973778	0.973778	9	32	0.00235693	9606	Homo sapiens	PPM1L;PPAP2A;SPP1		R-HSA-429732;R-HSA-428690;R-HSA-429730;R-HSA-429699;R-HSA-429683;R-HSA-429694;R-HSA-428701;R-HSA-428664;R-HSA-428696
R-HSA-5365859	RA biosynthesis pathway	1	41	0.00287296	0.97448	0.97448	1	11	0.000810194	9606	Homo sapiens	ALDH1A1		R-HSA-5362522
R-HSA-5357905	Regulation of TNFR1 signaling	1	41	0.00287296	0.97448	0.97448	1	17	0.00125212	9606	Homo sapiens	USP2		R-HSA-5357845
R-HSA-4086398	Ca2+ pathway	3	81	0.00567585	0.975507	0.975507	10	27	0.00198866	9606	Homo sapiens	GNG4;LEF1;NFATC2;NFATC1		R-HSA-8944362;R-HSA-4411383;R-HSA-4411365;R-HSA-398193;R-HSA-3965444;R-HSA-3965447;R-HSA-4551465;R-HSA-3965441;R-HSA-4551451;R-HSA-398040
R-HSA-69473	G2/M DNA damage checkpoint	3	81	0.00567585	0.975507	0.975507	2	12	0.000883848	9606	Homo sapiens	HIST1H2BJ;HIST1H2BG		R-HSA-5683735;R-HSA-69891
R-HSA-5663084	Diseases of carbohydrate metabolism	3	81	0.00567585	0.975507	0.975507	4	44	0.00324077	9606	Homo sapiens	GAL;PPP1R3C;NHLRC1		R-HSA-3797226;R-HSA-9036061;R-HSA-2265534;R-HSA-3791349
R-HSA-163125	Post-translational modification: synthesis of GPI-anchored proteins	5	115	0.0080583	0.975934	0.975934	1	16	0.00117846	9606	Homo sapiens	NTM;THY1;LYPD5;PRSS56;OPCML		R-HSA-8940388
R-HSA-112382	Formation of RNA Pol II elongation complex	2	63	0.00441455	0.976385	0.976385	2	2	0.000147308	9606	Homo sapiens	PAF1;SUPT5H		R-HSA-112379;R-HSA-112381
R-HSA-5619084	ABC transporter disorders	4	99	0.00693715	0.976659	0.976659	6	22	0.00162039	9606	Homo sapiens	PSMC4;ABCB4;DERL3;ABCC9		R-HSA-8866854;R-HSA-5678418;R-HSA-5678749;R-HSA-8866858;R-HSA-8866857;R-HSA-8866856
R-HSA-373080	Class B/2 (Secretin family receptors)	4	99	0.00693715	0.976659	0.976659	4	20	0.00147308	9606	Homo sapiens	CD97;GNG4;PTCH1;CD55		R-HSA-445124;R-HSA-444773;R-HSA-879674;R-HSA-381612
R-HSA-9006936	Signaling by TGFB family members	5	116	0.00812837	0.977314	0.977314	12	113	0.0083229	9606	Homo sapiens	ACVRL1;SERPINE1;EMB;F11R		R-HSA-9736966;R-HSA-2160931;R-HSA-2160932;R-HSA-2134532;R-HSA-2167924;R-HSA-178215;R-HSA-8858369;R-HSA-2160935;R-HSA-2134519;R-HSA-2134506;R-HSA-2106586;R-HSA-9736959
R-HSA-168928	DDX58/IFIH1-mediated induction of interferon-alpha/beta	4	100	0.00700722	0.97809	0.97809	5	53	0.00390366	9606	Homo sapiens	HERC5;BCAM;ISG15;NFKBIB		R-HSA-936462;R-HSA-168166;R-HSA-168935;R-HSA-936563;R-HSA-168140
R-HSA-73884	Base Excision Repair	4	100	0.00700722	0.97809	0.97809	6	107	0.00788098	9606	Homo sapiens	HIST1H2BJ;HIST1H2AD;HIST1H2BG		R-HSA-9629216;R-HSA-9629483;R-HSA-9629195;R-HSA-9629497;R-HSA-9629372;R-HSA-9629373
R-HSA-174084	Autodegradation of Cdh1 by Cdh1:APC/C	2	64	0.00448462	0.978119	0.978119	2	2	0.000147308	9606	Homo sapiens	PSMC4;UBE2E1		R-HSA-174058;R-HSA-174057
R-HSA-1169408	ISG15 antiviral mechanism	3	83	0.00581599	0.978646	0.978646	16	16	0.00117846	9606	Homo sapiens	HERC5;UBE2E1;ISG15		R-HSA-1678841;R-HSA-936462;R-HSA-1169395;R-HSA-1678843;R-HSA-1169394;R-HSA-1678842;R-HSA-1169397;R-HSA-1169399;R-HSA-1169398;R-HSA-1169403;R-HSA-1169307;R-HSA-1176059;R-HSA-1169402;R-HSA-1169405;R-HSA-1169404;R-HSA-1169406
R-HSA-8939902	Regulation of RUNX2 expression and activity	3	83	0.00581599	0.978646	0.978646	8	32	0.00235693	9606	Homo sapiens	PSMC4;DLX6;HIVEP3		R-HSA-8939801;R-HSA-9007707;R-HSA-9008475;R-HSA-9008076;R-HSA-9008110;R-HSA-9009362;R-HSA-9008036;R-HSA-9007686
R-HSA-917937	Iron uptake and transport	3	83	0.00581599	0.978646	0.978646	4	34	0.00250424	9606	Homo sapiens	TFR2;CYBRD1;ATP6V0C		R-HSA-917805;R-HSA-5252133;R-HSA-5691150;R-HSA-917841
R-HSA-9696264	RND3 GTPase cycle	1	43	0.0030131	0.978667	0.978667	1	2	0.000147308	9606	Homo sapiens	EPHA2		R-HSA-9696268
R-HSA-201556	Signaling by ALK	1	43	0.0030131	0.978667	0.978667	13	40	0.00294616	9606	Homo sapiens	STAT3		R-HSA-9701524;R-HSA-9701556;R-HSA-9701557;R-HSA-9701525;R-HSA-9701565;R-HSA-9701534;R-HSA-9701529;R-HSA-9701562;R-HSA-9701531;R-HSA-9701537;R-HSA-9701569;R-HSA-9701548;R-HSA-9701549
R-HSA-109582	Hemostasis	56	803	0.056268	0.978961	0.978961	129	334	0.0246004	9606	Homo sapiens	DAGLA;DOCK3;SERPINE1;F11R;CLU;THBD;DOCK11;ISLR;GNAT3;TMSB4X;MYB;CD36;PDK1;GUCY1A2;ANXA2;F2R;FGG;PLA2G4A;SERPINB8;SLC7A8;IRF1;PRKCQ;ITGA5;RAPGEF3;DGKI;GRB7;PDE1B;SDC2;GATA6;PDGFA;LRRC16A;LRP8;KLC3;EPCAM;GNG4;FYN;HIST1H3D;S100A10;MPZL2;LYN;NOS3;F12;ATP2B3;TNFRSF10B;CABLES1;IGJ;EHD2;EHD3;TG;ITGA10;ALB;MAFK;TEK;RAB5A		R-HSA-418309;R-HSA-392195;R-HSA-426240;R-HSA-432129;R-HSA-397835;R-HSA-204813;R-HSA-939265;R-HSA-392202;R-HSA-481044;R-HSA-418581;R-HSA-418579;R-HSA-418576;R-HSA-354066;R-HSA-159001;R-HSA-204824;R-HSA-158750;R-HSA-354073;R-HSA-210974;R-HSA-159005;R-HSA-354087;R-HSA-210977;R-HSA-140842;R-HSA-377644;R-HSA-140840;R-HSA-377641;R-HSA-377640;R-HSA-140847;R-HSA-418091;R-HSA-377643;R-HSA-8867240;R-HSA-14…
R-HSA-381070	IRE1alpha activates chaperones	4	101	0.00707729	0.979438	0.979438	3	53	0.00390366	9606	Homo sapiens	CHL1;JMJD7-PLA2G4B;CABP1		R-HSA-1791131;R-HSA-1791071;R-HSA-1791116
R-HSA-6791312	TP53 Regulates Transcription of Cell Cycle Genes	2	65	0.00455469	0.97973	0.97973	2	42	0.00309347	9606	Homo sapiens	PLAGL1		R-HSA-6803935;R-HSA-6803946
R-HSA-6802948	Signaling by high-kinase activity BRAF mutants	1	44	0.00308318	0.980496	0.980496	4	6	0.000441924	9606	Homo sapiens	FGG		R-HSA-6802912;R-HSA-6802911;R-HSA-6802910;R-HSA-6803227
R-HSA-9013420	RHOU GTPase cycle	1	44	0.00308318	0.980496	0.980496	1	4	0.000294616	9606	Homo sapiens	EPHA2		R-HSA-9018766
R-HSA-71064	Lysine catabolism	1	44	0.00308318	0.980496	0.980496	1	13	0.000957502	9606	Homo sapiens	PIPOX		R-HSA-6783880
R-HSA-5689896	Ovarian tumor domain proteases	1	44	0.00308318	0.980496	0.980496	1	14	0.00103116	9606	Homo sapiens	TNIP3		R-HSA-5690845
R-HSA-5609975	Diseases associated with glycosylation precursor biosynthesis	1	44	0.00308318	0.980496	0.980496	1	16	0.00117846	9606	Homo sapiens	GAL		R-HSA-4341669
R-HSA-3899300	SUMOylation of transcription cofactors	1	44	0.00308318	0.980496	0.980496	1	27	0.00198866	9606	Homo sapiens	TRIM28		R-HSA-3782535
R-HSA-75955	RNA Polymerase II Transcription Elongation	2	66	0.00462476	0.981226	0.981226	7	8	0.000589232	9606	Homo sapiens	PAF1;SUPT5H		R-HSA-112385;R-HSA-113412;R-HSA-112379;R-HSA-113402;R-HSA-112381;R-HSA-112396;R-HSA-113407
R-HSA-5678895	Defective CFTR causes cystic fibrosis	2	66	0.00462476	0.981226	0.981226	4	7	0.000515578	9606	Homo sapiens	PSMC4;DERL3		R-HSA-8866854;R-HSA-8866858;R-HSA-8866857;R-HSA-8866856
R-HSA-8979227	Triglyceride metabolism	2	66	0.00462476	0.981226	0.981226	1	24	0.0017677	9606	Homo sapiens	FABP2;FABP6		R-HSA-5334794
R-HSA-9006934	Signaling by Receptor Tyrosine Kinases	41	618	0.0433046	0.982112	0.982112	177	746	0.0549459	9606	Homo sapiens	GRB7;DOCK3;LAMC3;PDE3B;PDGFA;SPINT2;PCSK6;SPRED2;FLRT2;ERBB3;FLRT3;PDGFD;SPP1;GRB10;FYN;ZNF225;PDK1;LYN;DUSP4;EGR1;LAMB3;NOS3;STAT3;FOS;DNM1;DNM3;COL3A1;COL2A1;COL5A1;ABI2;SPINT1;NRG4;AXL;COL9A3;TRIB1;ATP6V0C		R-HSA-9701524;R-HSA-9613202;R-HSA-9701525;R-HSA-8848005;R-HSA-6785636;R-HSA-205319;R-HSA-9613207;R-HSA-1562641;R-HSA-9613210;R-HSA-9701534;R-HSA-9701529;R-HSA-9701531;R-HSA-9032582;R-HSA-9032601;R-HSA-203797;R-HSA-6785648;R-HSA-1250315;R-HSA-9621386;R-HSA-1247497;R-HSA-9621385;R-HSA-9031575;R-HSA-9701556;R-HSA-1963581;R-HSA-9701557;R-HSA-6800198;R-HSA-2317314;R-HSA-1250353;R-HSA-1963582;R-HSA-535…
R-HSA-5607764	CLEC7A (Dectin-1) signaling	5	120	0.00840866	0.982129	0.982129	5	45	0.00331443	9606	Homo sapiens	PSMC4;NFATC2;NFATC1;CARD11;PDK1		R-HSA-202534;R-HSA-5607731;R-HSA-2730849;R-HSA-5607724;R-HSA-2730867
R-HSA-165054	Rev-mediated nuclear export of HIV RNA	1	45	0.00315325	0.982168	0.982168	7	10	0.00073654	9606	Homo sapiens	EMB		R-HSA-180739;R-HSA-165043;R-HSA-165047;R-HSA-165028;R-HSA-180885;R-HSA-165034;R-HSA-165055
R-HSA-74217	Purine salvage	1	45	0.00315325	0.982168	0.982168	1	12	0.000883848	9606	Homo sapiens	AMPD2		R-HSA-76590
R-HSA-5358351	Signaling by Hedgehog	8	168	0.0117721	0.98258	0.98258	23	82	0.00603963	9606	Homo sapiens	DISP2;PSMC4;PTCH1;BOC;GAS1;ADCY2		R-HSA-5362448;R-HSA-5362551;R-HSA-5362422;R-HSA-5632668;R-HSA-5635868;R-HSA-5612508;R-HSA-5612510;R-HSA-5635865;R-HSA-5632677;R-HSA-5610757;R-HSA-5610727;R-HSA-5632646;R-HSA-5610758;R-HSA-5610754;R-HSA-5632653;R-HSA-5632652;R-HSA-5635854;R-HSA-5632649;R-HSA-5632648;R-HSA-5610760;R-HSA-5635848;R-HSA-5610763;R-HSA-5635850
R-HSA-1234174	Cellular response to hypoxia	3	86	0.00602621	0.982645	0.982645	20	20	0.00147308	9606	Homo sapiens	EGLN3;PSMC4;EPAS1		R-HSA-1234163;R-HSA-1234161;R-HSA-1234166;R-HSA-1234167;R-HSA-1234164;R-HSA-1234165;R-HSA-1235035;R-HSA-1234171;R-HSA-1234169;R-HSA-1235070;R-HSA-1234175;R-HSA-1234172;R-HSA-1234173;R-HSA-1235037;R-HSA-8932184;R-HSA-1234179;R-HSA-1234177;R-HSA-1234183;R-HSA-1234181;R-HSA-1234159
R-HSA-202733	Cell surface interactions at the vascular wall	14	257	0.0180085	0.982997	0.982997	26	65	0.00478751	9606	Homo sapiens	LYN;GRB7;SDC2;TNFRSF10B;F11R;IGJ;THBD;SLC7A8;EPCAM;FYN;TEK;ITGA5;MPZL2		R-HSA-210881;R-HSA-204871;R-HSA-5635741;R-HSA-204873;R-HSA-8870732;R-HSA-204813;R-HSA-114577;R-HSA-204824;R-HSA-202718;R-HSA-210974;R-HSA-375131;R-HSA-202723;R-HSA-210977;R-HSA-202726;R-HSA-204773;R-HSA-204779;R-HSA-8867240;R-HSA-210291;R-HSA-204850;R-HSA-141040;R-HSA-199093;R-HSA-8858428;R-HSA-210872;R-HSA-204863;R-HSA-204798;R-HSA-204861
R-HSA-2187338	Visual phototransduction	8	169	0.0118422	0.983465	0.983465	8	92	0.00677617	9606	Homo sapiens	AKR1C1;SDC2;LPL;PRKCQ;GPC4;LRP8;STRA6		R-HSA-2453876;R-HSA-2453863;R-HSA-74615;R-HSA-2404131;R-HSA-2395768;R-HSA-2423785;R-HSA-2429643;R-HSA-2855252
R-HSA-9675108	Nervous system development	41	621	0.0435148	0.983605	0.983605	156	324	0.0238639	9606	Homo sapiens	RET;GRB7;EPHA10;SDC2;GSPT2;CACNA1G;RELN;CHL1;FLRT3;CLTCL1;PAK7;GRB10;ST8SIA4;FYN;MYH11;NRCAM;SLIT3;SCN1B;EPHB3;LYN;SEMA6A;CNTN6;UNC5B;UNC5C;DNM1;DNM3;COL3A1;NFASC;COL2A1;EFNA2;COL5A1;LHX2;PSMC4;ITGA10;PLXNB3;CNTN2;COL9A3;PRKCQ;ITGA5;EPHA2		R-HSA-525833;R-HSA-3928633;R-HSA-9011083;R-HSA-3928632;R-HSA-3928639;R-HSA-3928627;R-HSA-3928625;R-HSA-3928624;R-HSA-9011074;R-HSA-3928631;R-HSA-9011077;R-HSA-3928628;R-HSA-3928617;R-HSA-3928616;R-HSA-3928623;R-HSA-3928610;R-HSA-622357;R-HSA-3928615;R-HSA-3928614;R-HSA-3928612;R-HSA-3928602;R-HSA-3928601;R-HSA-3928600;R-HSA-3928607;R-HSA-418850;R-HSA-3928604;R-HSA-3928595;R-HSA-418863;R-HSA-39285…
R-HSA-9035034	RHOF GTPase cycle	1	46	0.00322332	0.983696	0.983696	2	3	0.000220962	9606	Homo sapiens	ARHGAP1		R-HSA-9693282;R-HSA-9693125
R-HSA-168276	NS1 Mediated Effects on Host Pathways	1	46	0.00322332	0.983696	0.983696	1	6	0.000441924	9606	Homo sapiens	ISG15		R-HSA-1176059
R-HSA-189451	Heme biosynthesis	1	46	0.00322332	0.983696	0.983696	1	20	0.00147308	9606	Homo sapiens	ALB		R-HSA-9661419
R-HSA-5579029	Metabolic disorders of biological oxidation enzymes	3	87	0.00609628	0.98381	0.98381	3	38	0.00279885	9606	Homo sapiens	CYP24A1;CYP21A2;CYP7B1		R-HSA-5602885;R-HSA-5602004;R-HSA-5601976
R-HSA-194138	Signaling by VEGF	6	138	0.00966996	0.983843	0.983843	25	86	0.00633424	9606	Homo sapiens	ABI2;NOS3;AXL;FYN;TRIB1;PDK1		R-HSA-5218824;R-HSA-2029465;R-HSA-5218821;R-HSA-5218819;R-HSA-202127;R-HSA-5218847;R-HSA-202129;R-HSA-202137;R-HSA-5218832;R-HSA-2317314;R-HSA-202144;R-HSA-5357429;R-HSA-5357432;R-HSA-5218854;R-HSA-2316429;R-HSA-1497784;R-HSA-5218814;R-HSA-5218812;R-HSA-198640;R-HSA-5357479;R-HSA-5218806;R-HSA-5218804;R-HSA-202111;R-HSA-198270;R-HSA-202110
R-HSA-174154	APC/C:Cdc20 mediated degradation of Securin	2	68	0.00476491	0.983902	0.983902	3	3	0.000220962	9606	Homo sapiens	PSMC4;UBE2E1		R-HSA-174144;R-HSA-174202;R-HSA-174121
R-HSA-8873719	RAB geranylgeranylation	2	68	0.00476491	0.983902	0.983902	2	5	0.00036827	9606	Homo sapiens	RAB5A		R-HSA-8870469;R-HSA-8870466
R-HSA-983189	Kinesins	2	68	0.00476491	0.983902	0.983902	3	14	0.00103116	9606	Homo sapiens	KLC3		R-HSA-983259;R-HSA-983194;R-HSA-983266
R-HSA-156590	Glutathione conjugation	2	68	0.00476491	0.983902	0.983902	1	14	0.00103116	9606	Homo sapiens	GGT5;GGT6		R-HSA-8943279
R-HSA-2559583	Cellular Senescence	10	200	0.0140144	0.984036	0.984036	24	90	0.00662886	9606	Homo sapiens	HIST1H2BJ;STAT3;UBE2E1;HIST1H2AD;HIST1H2BG;FOS;HIST1H3D;HIST1H1C		R-HSA-3790137;R-HSA-4568740;R-HSA-3222546;R-HSA-4568737;R-HSA-3858387;R-HSA-3790130;R-HSA-3797202;R-HSA-3788725;R-HSA-4647594;R-HSA-3788724;R-HSA-3229089;R-HSA-3788745;R-HSA-3222593;R-HSA-3223200;R-HSA-450292;R-HSA-450325;R-HSA-3222533;R-HSA-3788748;R-HSA-3797196;R-HSA-3785711;R-HSA-3240295;R-HSA-3788705;R-HSA-3788708;R-HSA-3229102
R-HSA-400253	Circadian Clock	4	105	0.00735758	0.984085	0.984085	37	59	0.00434558	9606	Homo sapiens	SERPINE1;NPAS2		R-HSA-5663127;R-HSA-5663124;R-HSA-5663122;R-HSA-5663120;R-HSA-400256;R-HSA-5663132;R-HSA-421320;R-HSA-8878679;R-HSA-5663174;R-HSA-1368133;R-HSA-549467;R-HSA-5663170;R-HSA-1368065;R-HSA-549533;R-HSA-879770;R-HSA-5663105;R-HSA-5663118;R-HSA-5663246;R-HSA-5663245;R-HSA-879762;R-HSA-5669302;R-HSA-879724;R-HSA-400228;R-HSA-5663156;R-HSA-549355;R-HSA-5663155;R-HSA-8878702;R-HSA-879782;R-HSA-5663165;R-H…
R-HSA-2168880	Scavenging of heme from plasma	4	106	0.00742765	0.98508	0.98508	6	12	0.000883848	9606	Homo sapiens	ALB;HP;APOL1;IGJ		R-HSA-2168883;R-HSA-2168885;R-HSA-2168887;R-HSA-2230938;R-HSA-2168889;R-HSA-2203516
R-HSA-177243	Interactions of Rev with host cellular proteins	1	47	0.00329339	0.985094	0.985094	7	16	0.00117846	9606	Homo sapiens	EMB		R-HSA-180739;R-HSA-165043;R-HSA-165047;R-HSA-165028;R-HSA-180885;R-HSA-165034;R-HSA-165055
R-HSA-451927	Interleukin-2 family signaling	1	47	0.00329339	0.985094	0.985094	12	59	0.00434558	9606	Homo sapiens	STAT3		R-HSA-8985929;R-HSA-9006873;R-HSA-8983371;R-HSA-8983373;R-HSA-8985981;R-HSA-8985900;R-HSA-8983374;R-HSA-8985966;R-HSA-8983379;R-HSA-8983378;R-HSA-8985988;R-HSA-9006870
R-HSA-1251985	Nuclear signaling by ERBB4	1	47	0.00329339	0.985094	0.985094	1	34	0.00250424	9606	Homo sapiens	NRG4		R-HSA-1251992
R-HSA-3299685	Detoxification of Reactive Oxygen Species	2	69	0.00483498	0.985098	0.985098	2	34	0.00250424	9606	Homo sapiens	GPX3		R-HSA-3341397;R-HSA-6799695
R-HSA-9006931	Signaling by Nuclear Receptors	23	387	0.0271179	0.985813	0.985813	58	192	0.0141416	9606	Homo sapiens	HIST1H2BJ;NOS3;FOS;CXXC5;ESR2;RUNX1;FABP6;GNG4;GNAT3;MYB;ALDH1A1;HIST1H2AD;S1PR3;HIST1H2BG;EMB;HIST1H3D;PDK1		R-HSA-9011981;R-HSA-9632918;R-HSA-8931981;R-HSA-9021068;R-HSA-9011983;R-HSA-9633044;R-HSA-9011971;R-HSA-5362522;R-HSA-202127;R-HSA-9011975;R-HSA-9021596;R-HSA-9625479;R-HSA-9011985;R-HSA-9632906;R-HSA-9011984;R-HSA-9021072;R-HSA-9632910;R-HSA-9021079;R-HSA-9009065;R-HSA-9021609;R-HSA-9632182;R-HSA-9021601;R-HSA-9012000;R-HSA-9021600;R-HSA-203946;R-HSA-8932020;R-HSA-9607342;R-HSA-8932021;R-HSA-962…
R-HSA-418555	G alpha (s) signalling events	8	172	0.0120524	0.985877	0.985877	11	18	0.00132577	9606	Homo sapiens	GNAZ;GRK5;PDE1B;GNAT3;GNG4;PDE3B;ADCY2;TSHR		R-HSA-379044;R-HSA-8851797;R-HSA-163617;R-HSA-392129;R-HSA-9705507;R-HSA-8982641;R-HSA-8982645;R-HSA-744887;R-HSA-744886;R-HSA-751013;R-HSA-418553
R-HSA-195721	Signaling by WNT	19	332	0.023264	0.985885	0.985885	60	157	0.0115637	9606	Homo sapiens	HIST1H2BJ;LEF1;LRP5;NFATC2;NFATC1;CXXC4;DKK2;GNG4;PSMC4;HECW1;HIST1H2AD;PIP5K1B;HIST1H2BG;EMB;LGR5;SOX7;HIST1H3D;RSPO4;DACT1		R-HSA-3769401;R-HSA-3322422;R-HSA-3769392;R-HSA-3364026;R-HSA-4641231;R-HSA-3322427;R-HSA-3322424;R-HSA-3769397;R-HSA-4608855;R-HSA-4641236;R-HSA-4411351;R-HSA-3769391;R-HSA-4641246;R-HSA-3364014;R-HSA-3640874;R-HSA-5665608;R-HSA-4411357;R-HSA-4641253;R-HSA-4411367;R-HSA-3451153;R-HSA-4411365;R-HSA-4641249;R-HSA-4641260;R-HSA-1504188;R-HSA-3772434;R-HSA-1504186;R-HSA-1458875;R-HSA-3772436;R-HSA-4…
R-HSA-8943724	Regulation of PTEN gene transcription	2	70	0.00490505	0.986206	0.986206	4	15	0.00110481	9606	Homo sapiens	EGR1;SALL4;ZNF225		R-HSA-8944104;R-HSA-8944078;R-HSA-8943728;R-HSA-8943780
R-HSA-110313	Translesion synthesis by Y family DNA polymerases bypasses lesions on DNA template	1	48	0.00336346	0.986372	0.986372	5	28	0.00206231	9606	Homo sapiens	ISG15		R-HSA-5653766;R-HSA-5653780;R-HSA-5653786;R-HSA-5653754;R-HSA-5653770
R-HSA-549132	Organic cation/anion/zwitterion transport	1	48	0.00336346	0.986372	0.986372	1	12	0.000883848	9606	Homo sapiens	RUNX1		R-HSA-549241
R-HSA-5693607	Processing of DNA double-strand break ends	3	90	0.0063065	0.986875	0.986875	2	17	0.00125212	9606	Homo sapiens	HIST1H2BJ;HIST1H2BG		R-HSA-5684071;R-HSA-5684052
R-HSA-428157	Sphingolipid metabolism	7	158	0.0110714	0.987112	0.987112	15	64	0.00471385	9606	Homo sapiens	SMPD3;UGCG;GAL;PPM1L;PPAP2A;SPP1;ARSG		R-HSA-1605624;R-HSA-1638104;R-HSA-1614362;R-HSA-429732;R-HSA-1605724;R-HSA-429730;R-HSA-429699;R-HSA-1606312;R-HSA-428690;R-HSA-429683;R-HSA-429694;R-HSA-1606273;R-HSA-428701;R-HSA-428664;R-HSA-428696
R-HSA-5658442	Regulation of RAS by GAPs	2	71	0.00497512	0.987235	0.987235	5	5	0.00036827	9606	Homo sapiens	SPRED2;PSMC4		R-HSA-5658438;R-HSA-5658231;R-HSA-5658435;R-HSA-5658430;R-HSA-5658424
R-HSA-936837	Ion transport by P-type ATPases	2	71	0.00497512	0.987235	0.987235	2	16	0.00117846	9606	Homo sapiens	CAMK2B;ATP2B3		R-HSA-427910;R-HSA-418309
R-HSA-69306	DNA Replication	8	174	0.0121926	0.987299	0.987299	23	53	0.00390366	9606	Homo sapiens	HIST1H2BJ;PSMC4;ORC2;UBE2E1;HIST1H2AD;HIST1H2BG;HIST1H3D		R-HSA-68960;R-HSA-68611;R-HSA-68610;R-HSA-68615;R-HSA-68940;R-HSA-176973;R-HSA-68849;R-HSA-68688;R-HSA-68944;R-HSA-68595;R-HSA-68914;R-HSA-68917;R-HSA-68916;R-HSA-68948;R-HSA-69015;R-HSA-68919;R-HSA-68918;R-HSA-68825;R-HSA-9749197;R-HSA-69016;R-HSA-68603;R-HSA-68826;R-HSA-9749098
R-HSA-167200	Formation of HIV-1 elongation complex containing HIV-1 Tat	1	49	0.00343354	0.987541	0.987541	4	5	0.00036827	9606	Homo sapiens	SUPT5H		R-HSA-170706;R-HSA-170704;R-HSA-167191;R-HSA-167196
R-HSA-5674135	MAP2K and MAPK activation	1	49	0.00343354	0.987541	0.987541	8	12	0.000883848	9606	Homo sapiens	FGG		R-HSA-9657603;R-HSA-5672980;R-HSA-5672978;R-HSA-9657606;R-HSA-5672972;R-HSA-5672973;R-HSA-9657608;R-HSA-9657599
R-HSA-3000480	Scavenging by Class A Receptors	1	49	0.00343354	0.987541	0.987541	1	10	0.00073654	9606	Homo sapiens	COL3A1		R-HSA-3221843
R-HSA-5655302	Signaling by FGFR1 in disease	1	49	0.00343354	0.987541	0.987541	1	35	0.00257789	9606	Homo sapiens	STAT3		R-HSA-1888198
R-HSA-9683701	Translation of Structural Proteins	1	49	0.00343354	0.987541	0.987541	1	37	0.0027252	9606	Homo sapiens	ST6GAL1		R-HSA-9683769
R-HSA-877300	Interferon gamma signaling	13	250	0.017518	0.987788	0.987788	3	16	0.00117846	9606	Homo sapiens	CAMK2B;IRF1;IRF6;GBP2;GBP1;GBP4;GBP3		R-HSA-1031716;R-HSA-909552;R-HSA-1031713
R-HSA-5673001	RAF/MAP kinase cascade	18	322	0.0225632	0.987979	0.987979	23	75	0.00552405	9606	Homo sapiens	RET;CAMK2B;DUSP4;DUSP5;FGG;PDGFA;DUSP9;SPRED2;MRAS;ERBB3;NRG4;PSMC4;PDE6D;NEFL;FYN;PRKCQ;TEK		R-HSA-5658231;R-HSA-5672980;R-HSA-5672978;R-HSA-5675376;R-HSA-5658430;R-HSA-9654523;R-HSA-9653503;R-HSA-9657599;R-HSA-5658424;R-HSA-9654525;R-HSA-5658438;R-HSA-9657603;R-HSA-5672965;R-HSA-5658435;R-HSA-9657606;R-HSA-9654533;R-HSA-5672972;R-HSA-5675373;R-HSA-5672973;R-HSA-9657608;R-HSA-9658445;R-HSA-9656781;R-HSA-5672969
R-HSA-5690714	CD22 mediated BCR regulation	2	72	0.0050452	0.988188	0.988188	3	4	0.000294616	9606	Homo sapiens	LYN;CD79A		R-HSA-5690740;R-HSA-5690702;R-HSA-5690701
R-HSA-5358346	Hedgehog ligand biogenesis	2	72	0.0050452	0.988188	0.988188	3	15	0.00110481	9606	Homo sapiens	DISP2;PSMC4		R-HSA-5362448;R-HSA-5362551;R-HSA-5362422
R-HSA-211976	Endogenous sterols	2	72	0.0050452	0.988188	0.988188	3	18	0.00132577	9606	Homo sapiens	CYP21A2;CYP7B1		R-HSA-192051;R-HSA-192065;R-HSA-193964
R-HSA-196071	Metabolism of steroid hormones	2	72	0.0050452	0.988188	0.988188	3	40	0.00294616	9606	Homo sapiens	CYP21A2;HSD17B3		R-HSA-193064;R-HSA-193964;R-HSA-193981
R-HSA-167152	Formation of HIV elongation complex in the absence of HIV Tat	1	50	0.00350361	0.988609	0.988609	2	2	0.000147308	9606	Homo sapiens	SUPT5H		R-HSA-167077;R-HSA-167084
R-HSA-211733	Regulation of activated PAK-2p34 by proteasome mediated degradation	1	50	0.00350361	0.988609	0.988609	1	2	0.000147308	9606	Homo sapiens	PSMC4		R-HSA-211715
R-HSA-6802952	Signaling by BRAF and RAF1 fusions	2	73	0.00511527	0.989072	0.989072	5	5	0.00036827	9606	Homo sapiens	CAMK2B;FGG		R-HSA-6802935;R-HSA-6802934;R-HSA-6802933;R-HSA-6802932;R-HSA-6802927
R-HSA-174184	Cdc20:Phospho-APC/C mediated degradation of Cyclin A	2	73	0.00511527	0.989072	0.989072	3	3	0.000220962	9606	Homo sapiens	PSMC4;UBE2E1		R-HSA-174171;R-HSA-174104;R-HSA-174255
R-HSA-68949	Orc1 removal from chromatin	2	73	0.00511527	0.989072	0.989072	2	4	0.000294616	9606	Homo sapiens	PSMC4;ORC2		R-HSA-68944;R-HSA-68948
R-HSA-5362517	Signaling by Retinoic Acid	2	73	0.00511527	0.989072	0.989072	2	21	0.00154673	9606	Homo sapiens	ALDH1A1;PDK1		R-HSA-203946;R-HSA-5362522
R-HSA-8950505	Gene and protein expression by JAK-STAT signaling after Interleukin-12 stimulation	2	73	0.00511527	0.989072	0.989072	1	36	0.00265154	9606	Homo sapiens	ANXA2		R-HSA-8950480
R-HSA-8856828	Clathrin-mediated endocytosis	7	161	0.0112816	0.989096	0.989096	21	35	0.00257789	9606	Homo sapiens	DNM3;VAMP8;SGIP1;CLTCL1;RAB5A;DNM1		R-HSA-8868071;R-HSA-8868230;R-HSA-8856813;R-HSA-8867756;R-HSA-8868236;R-HSA-8868651;R-HSA-8866283;R-HSA-8867754;R-HSA-8868072;R-HSA-8868648;R-HSA-8862280;R-HSA-8856808;R-HSA-8868661;R-HSA-8868660;R-HSA-8868659;R-HSA-8868658;R-HSA-8869438;R-HSA-8867613;R-HSA-8871196;R-HSA-8871194;R-HSA-8871193
R-HSA-157579	Telomere Maintenance	4	111	0.00777801	0.989232	0.989232	5	34	0.00250424	9606	Homo sapiens	HIST1H2BJ;HIST1H2AD;HIST1H2BG		R-HSA-9670114;R-HSA-9670149;R-HSA-9670101;R-HSA-181450;R-HSA-176700
R-HSA-69052	Switching of origins to a post-replicative state	3	93	0.00651671	0.989378	0.989378	4	9	0.000662886	9606	Homo sapiens	PSMC4;ORC2;UBE2E1		R-HSA-68944;R-HSA-68948;R-HSA-69015;R-HSA-69016
R-HSA-350562	Regulation of ornithine decarboxylase (ODC)	1	51	0.00357368	0.989586	0.989586	1	4	0.000294616	9606	Homo sapiens	PSMC4		R-HSA-353125
R-HSA-73621	Pyrimidine catabolism	1	51	0.00357368	0.989586	0.989586	2	17	0.00125212	9606	Homo sapiens	DPYD		R-HSA-73585;R-HSA-73616
R-HSA-8854214	TBC/RABGAPs	1	51	0.00357368	0.989586	0.989586	1	14	0.00103116	9606	Homo sapiens	RAB5A		R-HSA-8854222
R-HSA-69236	G1 Phase	1	51	0.00357368	0.989586	0.989586	1	15	0.00110481	9606	Homo sapiens	LYN		R-HSA-8942607
R-HSA-69231	Cyclin D associated events in G1	1	51	0.00357368	0.989586	0.989586	1	15	0.00110481	9606	Homo sapiens	LYN		R-HSA-8942607
R-HSA-442660	Na+/Cl- dependent neurotransmitter transporters	1	51	0.00357368	0.989586	0.989586	1	15	0.00110481	9606	Homo sapiens	SLC6A1		R-HSA-444007
R-HSA-9637690	Response of Mtb to phagocytosis	1	51	0.00357368	0.989586	0.989586	1	30	0.00220962	9606	Homo sapiens	RAB5A		R-HSA-9636684
R-HSA-5633007	Regulation of TP53 Activity	8	178	0.0124728	0.989751	0.989751	14	98	0.00721809	9606	Homo sapiens	CPNE9;ING5;USP2;TP53INP1;PRKAG2;PIP4K2A;SMYD3;PDK1		R-HSA-6805638;R-HSA-3215251;R-HSA-5689972;R-HSA-6811522;R-HSA-3222237;R-HSA-6805640;R-HSA-6805620;R-HSA-6805650;R-HSA-6799409;R-HSA-6795473;R-HSA-6805470;R-HSA-6805022;R-HSA-8877692;R-HSA-8877691
R-HSA-174178	APC/C:Cdh1 mediated degradation of Cdc20 and other APC/C:Cdh1 targeted proteins in late mitosis/early G1	2	74	0.00518534	0.989891	0.989891	6	6	0.000441924	9606	Homo sapiens	PSMC4;UBE2E1		R-HSA-174195;R-HSA-9686980;R-HSA-9686969;R-HSA-174088;R-HSA-174105;R-HSA-188191
R-HSA-179419	APC:Cdc20 mediated degradation of cell cycle proteins prior to satisfation of the cell cycle checkpoint	2	74	0.00518534	0.989891	0.989891	6	6	0.000441924	9606	Homo sapiens	PSMC4;UBE2E1		R-HSA-179410;R-HSA-174171;R-HSA-174104;R-HSA-179417;R-HSA-174255;R-HSA-179421
R-HSA-8948751	Regulation of PTEN stability and activity	2	74	0.00518534	0.989891	0.989891	2	13	0.000957502	9606	Homo sapiens	PREX2;PSMC4		R-HSA-8850961;R-HSA-8850992
R-HSA-163841	Gamma carboxylation, hypusine formation and arylsulfatase activation	2	74	0.00518534	0.989891	0.989891	2	40	0.00294616	9606	Homo sapiens	DPH3;ARSG		R-HSA-1614362;R-HSA-5358494
R-HSA-1169410	Antiviral mechanism by IFN-stimulated genes	3	94	0.00658678	0.990105	0.990105	16	31	0.00228327	9606	Homo sapiens	HERC5;UBE2E1;ISG15		R-HSA-1678841;R-HSA-936462;R-HSA-1169395;R-HSA-1678843;R-HSA-1169394;R-HSA-1678842;R-HSA-1169397;R-HSA-1169399;R-HSA-1169398;R-HSA-1169403;R-HSA-1169307;R-HSA-1176059;R-HSA-1169402;R-HSA-1169405;R-HSA-1169404;R-HSA-1169406
R-HSA-8876198	RAB GEFs exchange GTP for GDP on RABs	3	94	0.00658678	0.990105	0.990105	1	21	0.00154673	9606	Homo sapiens	RINL;RAB5A		R-HSA-8875320
R-HSA-167246	Tat-mediated elongation of the HIV-1 transcript	1	52	0.00364375	0.990479	0.990479	7	8	0.000589232	9606	Homo sapiens	SUPT5H		R-HSA-170706;R-HSA-170704;R-HSA-167191;R-HSA-167192;R-HSA-167196;R-HSA-167197;R-HSA-167181
R-HSA-167169	HIV Transcription Elongation	1	52	0.00364375	0.990479	0.990479	12	15	0.00110481	9606	Homo sapiens	SUPT5H		R-HSA-170706;R-HSA-170704;R-HSA-167478;R-HSA-167191;R-HSA-167147;R-HSA-167083;R-HSA-167192;R-HSA-167087;R-HSA-167196;R-HSA-167181;R-HSA-167085;R-HSA-167197
R-HSA-2142691	Synthesis of Leukotrienes (LT) and Eoxins (EX)	1	52	0.00364375	0.990479	0.990479	1	19	0.00139943	9606	Homo sapiens	GGT5		R-HSA-266046
R-HSA-69017	CDK-mediated phosphorylation and removal of Cdc6	2	75	0.00525541	0.99065	0.99065	2	4	0.000294616	9606	Homo sapiens	PSMC4;UBE2E1		R-HSA-69015;R-HSA-69016
R-HSA-9013026	RHOB GTPase cycle	2	75	0.00525541	0.99065	0.99065	2	6	0.000441924	9606	Homo sapiens	STK10;ARHGAP1		R-HSA-9013022;R-HSA-9013024
R-HSA-9707587	Regulation of HMOX1 expression and activity	2	75	0.00525541	0.99065	0.99065	4	19	0.00139943	9606	Homo sapiens	PSMC4;MAFK		R-HSA-9708557;R-HSA-9707645;R-HSA-8932355;R-HSA-9707690
R-HSA-3247509	Chromatin modifying enzymes	13	256	0.0179385	0.990738	0.990738	62	85	0.00626059	9606	Homo sapiens	CPNE9;ING5;HIST1H2BJ;PRDM16;HIST1H2AD;PADI2;SMYD3;HIST1H2BG;HIST1H3D		R-HSA-5159245;R-HSA-1183128;R-HSA-5205824;R-HSA-5651654;R-HSA-5144542;R-HSA-5661122;R-HSA-5661123;R-HSA-5661120;R-HSA-5661121;R-HSA-4722133;R-HSA-5229010;R-HSA-5651657;R-HSA-5205867;R-HSA-5216234;R-HSA-5634802;R-HSA-5638141;R-HSA-5649764;R-HSA-3697920;R-HSA-3318415;R-HSA-4827383;R-HSA-3318413;R-HSA-4827382;R-HSA-4754187;R-HSA-5244692;R-HSA-3321975;R-HSA-3782655;R-HSA-3301237;R-HSA-5218952;R-HSA-3…
R-HSA-4839726	Chromatin organization	13	256	0.0179385	0.990738	0.990738	62	85	0.00626059	9606	Homo sapiens	CPNE9;ING5;HIST1H2BJ;PRDM16;HIST1H2AD;PADI2;SMYD3;HIST1H2BG;HIST1H3D		R-HSA-5159245;R-HSA-1183128;R-HSA-5205824;R-HSA-5651654;R-HSA-5144542;R-HSA-5661122;R-HSA-5661123;R-HSA-5661120;R-HSA-5661121;R-HSA-4722133;R-HSA-5229010;R-HSA-5651657;R-HSA-5205867;R-HSA-5216234;R-HSA-5634802;R-HSA-5638141;R-HSA-5649764;R-HSA-3697920;R-HSA-3318415;R-HSA-4827383;R-HSA-3318413;R-HSA-4827382;R-HSA-4754187;R-HSA-5244692;R-HSA-3321975;R-HSA-3782655;R-HSA-3301237;R-HSA-5218952;R-HSA-3…
R-HSA-112315	Transmission across Chemical Synapses	19	343	0.0240348	0.990932	0.990932	70	163	0.0120056	9606	Homo sapiens	CAMK2B;SNAP25;CACNA2D3;PRKAG2;GRIK4;CACNA2D2;ADCY2;GRIK2;SLC6A1;KIF17;GRIN2A;GNAL;GNG4;GNAT3;NAAA;NEFL;PDK1;GRIA4		R-HSA-9609746;R-HSA-888589;R-HSA-9611030;R-HSA-9619478;R-HSA-421007;R-HSA-392206;R-HSA-9610270;R-HSA-442760;R-HSA-9610653;R-HSA-374922;R-HSA-9610627;R-HSA-1013020;R-HSA-438037;R-HSA-9609738;R-HSA-1013013;R-HSA-380574;R-HSA-1013012;R-HSA-9609742;R-HSA-372505;R-HSA-9610802;R-HSA-432164;R-HSA-432162;R-HSA-9612085;R-HSA-170666;R-HSA-9619515;R-HSA-432172;R-HSA-9618750;R-HSA-170671;R-HSA-170674;R-HSA-4…
R-HSA-5684996	MAPK1/MAPK3 signaling	18	329	0.0230537	0.990996	0.990996	23	82	0.00603963	9606	Homo sapiens	RET;CAMK2B;DUSP4;DUSP5;FGG;PDGFA;DUSP9;SPRED2;MRAS;ERBB3;NRG4;PSMC4;PDE6D;NEFL;FYN;PRKCQ;TEK		R-HSA-5658231;R-HSA-5672980;R-HSA-5672978;R-HSA-5675376;R-HSA-5658430;R-HSA-9654523;R-HSA-9653503;R-HSA-9657599;R-HSA-5658424;R-HSA-9654525;R-HSA-5658438;R-HSA-9657603;R-HSA-5672965;R-HSA-5658435;R-HSA-9657606;R-HSA-9654533;R-HSA-5672972;R-HSA-5675373;R-HSA-5672973;R-HSA-9657608;R-HSA-9658445;R-HSA-9656781;R-HSA-5672969
R-HSA-168333	NEP/NS2 Interacts with the Cellular Export Machinery	1	53	0.00371383	0.991296	0.991296	2	2	0.000147308	9606	Homo sapiens	EMB		R-HSA-168880;R-HSA-168857
R-HSA-6783310	Fanconi Anemia Pathway	1	53	0.00371383	0.991296	0.991296	12	15	0.00110481	9606	Homo sapiens	C19orf40		R-HSA-6785607;R-HSA-6785126;R-HSA-6786166;R-HSA-6785732;R-HSA-6785986;R-HSA-6788385;R-HSA-6785361;R-HSA-6785087;R-HSA-6785342;R-HSA-6786155;R-HSA-6786171;R-HSA-6788392
R-HSA-180534	Vpu mediated degradation of CD4	1	53	0.00371383	0.991296	0.991296	1	5	0.00036827	9606	Homo sapiens	PSMC4		R-HSA-180573
R-HSA-1236978	Cross-presentation of soluble exogenous antigens (endosomes)	1	53	0.00371383	0.991296	0.991296	1	6	0.000441924	9606	Homo sapiens	PSMC4		R-HSA-1236970
R-HSA-176409	APC/C:Cdc20 mediated degradation of mitotic proteins	2	76	0.00532549	0.991354	0.991354	13	13	0.000957502	9606	Homo sapiens	PSMC4;UBE2E1		R-HSA-174144;R-HSA-174120;R-HSA-174121;R-HSA-174255;R-HSA-174157;R-HSA-179410;R-HSA-174227;R-HSA-174202;R-HSA-174171;R-HSA-174104;R-HSA-179417;R-HSA-174238;R-HSA-179421
R-HSA-390466	Chaperonin-mediated protein folding	3	96	0.00672693	0.991418	0.991418	7	19	0.00139943	9606	Homo sapiens	GNG4;STAT3;PDCL		R-HSA-8850534;R-HSA-390470;R-HSA-6814418;R-HSA-8850560;R-HSA-8850527;R-HSA-6814121;R-HSA-6814409
R-HSA-176814	Activation of APC/C and APC/C:Cdc20 mediated degradation of mitotic proteins	2	77	0.00539556	0.992005	0.992005	15	15	0.00110481	9606	Homo sapiens	PSMC4;UBE2E1		R-HSA-174144;R-HSA-174119;R-HSA-174120;R-HSA-174121;R-HSA-174255;R-HSA-174157;R-HSA-179410;R-HSA-174227;R-HSA-174132;R-HSA-174202;R-HSA-174171;R-HSA-174104;R-HSA-179417;R-HSA-174238;R-HSA-179421
R-HSA-168274	Export of Viral Ribonucleoproteins from Nucleus	1	54	0.0037839	0.992042	0.992042	2	5	0.00036827	9606	Homo sapiens	EMB		R-HSA-168880;R-HSA-168857
R-HSA-69613	p53-Independent G1/S DNA damage checkpoint	1	54	0.0037839	0.992042	0.992042	1	4	0.000294616	9606	Homo sapiens	PSMC4		R-HSA-69600
R-HSA-69601	Ubiquitin Mediated Degradation of Phosphorylated Cdc25A	1	54	0.0037839	0.992042	0.992042	1	4	0.000294616	9606	Homo sapiens	PSMC4		R-HSA-69600
R-HSA-69610	p53-Independent DNA Damage Response	1	54	0.0037839	0.992042	0.992042	1	4	0.000294616	9606	Homo sapiens	PSMC4		R-HSA-69600
R-HSA-349425	Autodegradation of the E3 ubiquitin ligase COP1	1	54	0.0037839	0.992042	0.992042	1	5	0.00036827	9606	Homo sapiens	PSMC4		R-HSA-264458
R-HSA-75815	Ubiquitin-dependent degradation of Cyclin D	1	54	0.0037839	0.992042	0.992042	1	5	0.00036827	9606	Homo sapiens	PSMC4		R-HSA-75825
R-HSA-9664424	Cell recruitment (pro-inflammatory response)	1	54	0.0037839	0.992042	0.992042	4	23	0.00169404	9606	Homo sapiens	CASP1		R-HSA-448678;R-HSA-448702;R-HSA-844612;R-HSA-448703
R-HSA-9660826	Purinergic signaling in leishmaniasis infection	1	54	0.0037839	0.992042	0.992042	4	23	0.00169404	9606	Homo sapiens	CASP1		R-HSA-448678;R-HSA-448702;R-HSA-844612;R-HSA-448703
R-HSA-2514859	Inactivation, recovery and regulation of the phototransduction cascade	1	54	0.0037839	0.992042	0.992042	1	19	0.00139943	9606	Homo sapiens	PRKCQ		R-HSA-74615
R-HSA-446652	Interleukin-1 family signaling	7	167	0.0117021	0.992235	0.992235	19	80	0.00589232	9606	Homo sapiens	BCAM;IRAK2;PSMC4;STAT3;CASP1;PELI1;NFKBIB		R-HSA-448678;R-HSA-450690;R-HSA-168166;R-HSA-9012556;R-HSA-209061;R-HSA-448673;R-HSA-8948066;R-HSA-450827;R-HSA-168140;R-HSA-8948063;R-HSA-9012542;R-HSA-9012689;R-HSA-448702;R-HSA-9009072;R-HSA-448703;R-HSA-9630923;R-HSA-446684;R-HSA-168184;R-HSA-451418
R-HSA-2173782	Binding and Uptake of Ligands by Scavenger Receptors	7	168	0.0117721	0.992667	0.992667	11	33	0.00243058	9606	Homo sapiens	SCARB1;COL3A1;ALB;HP;CD36;APOL1;IGJ		R-HSA-2187264;R-HSA-3221843;R-HSA-2168883;R-HSA-2168885;R-HSA-2512800;R-HSA-2168887;R-HSA-2230938;R-HSA-2168889;R-HSA-2247512;R-HSA-2203516;R-HSA-2197646
R-HSA-8854050	FBXL7 down-regulates AURKA during mitotic entry and in early mitosis	1	55	0.00385397	0.992725	0.992725	2	6	0.000441924	9606	Homo sapiens	PSMC4		R-HSA-8854071;R-HSA-8854044
R-HSA-174113	SCF-beta-TrCP mediated degradation of Emi1	1	55	0.00385397	0.992725	0.992725	1	3	0.000220962	9606	Homo sapiens	PSMC4		R-HSA-174203
R-HSA-1483191	Synthesis of PC	1	55	0.00385397	0.992725	0.992725	1	18	0.00132577	9606	Homo sapiens	MFSD2A		R-HSA-8865637
R-HSA-68875	Mitotic Prophase	5	135	0.00945974	0.992911	0.992911	8	34	0.00250424	9606	Homo sapiens	HIST1H2BJ;HIST1H2AD;HIST1H2BG;HIST1H3D		R-HSA-2245218;R-HSA-2288097;R-HSA-2301205;R-HSA-2294580;R-HSA-2172678;R-HSA-2294600;R-HSA-2294574;R-HSA-2294590
R-HSA-72165	mRNA Splicing - Minor Pathway	1	56	0.00392404	0.993349	0.993349	5	5	0.00036827	9606	Homo sapiens	SNRPG;SNRPGP15		R-HSA-75079;R-HSA-75081;R-HSA-75080;R-HSA-75083;R-HSA-75082
R-HSA-5620924	Intraflagellar transport	1	56	0.00392404	0.993349	0.993349	8	12	0.000883848	9606	Homo sapiens	KIF17		R-HSA-5624949;R-HSA-5624948;R-HSA-5624951;R-HSA-5625424;R-HSA-5625426;R-HSA-5625421;R-HSA-5624952;R-HSA-5625416
R-HSA-450408	AUF1 (hnRNP D0) binds and destabilizes mRNA	1	56	0.00392404	0.993349	0.993349	1	4	0.000294616	9606	Homo sapiens	PSMC4		R-HSA-450466
R-HSA-180585	Vif-mediated degradation of APOBEC3G	1	56	0.00392404	0.993349	0.993349	1	4	0.000294616	9606	Homo sapiens	PSMC4		R-HSA-180603
R-HSA-112310	Neurotransmitter release cycle	3	100	0.00700722	0.993558	0.993558	14	37	0.0027252	9606	Homo sapiens	SNAP25;NAAA;SLC6A1		R-HSA-888589;R-HSA-380869;R-HSA-380901;R-HSA-444007;R-HSA-380905;R-HSA-6803753;R-HSA-374922;R-HSA-372529;R-HSA-374899;R-HSA-210426;R-HSA-380574;R-HSA-372505;R-HSA-210430;R-HSA-917744
R-HSA-499943	Interconversion of nucleotide di- and triphosphates	2	80	0.00560577	0.993685	0.993685	4	33	0.00243058	9606	Homo sapiens	CTPS2;GLRX		R-HSA-504054;R-HSA-8866405;R-HSA-111746;R-HSA-111742
R-HSA-8980692	RHOA GTPase cycle	6	154	0.0107911	0.993699	0.993699	4	6	0.000441924	9606	Homo sapiens	PREX2;STK10;ARHGDIB;ARHGAP1;RHPN1;ARHGAP18		R-HSA-9013009;R-HSA-8980691;R-HSA-9012835;R-HSA-8981637
R-HSA-4641257	Degradation of AXIN	1	57	0.00399411	0.99392	0.99392	2	8	0.000589232	9606	Homo sapiens	PSMC4		R-HSA-3640874;R-HSA-4641256
R-HSA-73893	DNA Damage Bypass	1	57	0.00399411	0.99392	0.99392	5	34	0.00250424	9606	Homo sapiens	ISG15		R-HSA-5653766;R-HSA-5653780;R-HSA-5653786;R-HSA-5653754;R-HSA-5653770
R-HSA-532668	N-glycan trimming in the ER and Calnexin/Calreticulin cycle	1	57	0.00399411	0.99392	0.99392	2	18	0.00132577	9606	Homo sapiens	MLEC		R-HSA-532667;R-HSA-901006
R-HSA-8941858	Regulation of RUNX3 expression and activity	1	57	0.00399411	0.99392	0.99392	1	9	0.000662886	9606	Homo sapiens	PSMC4		R-HSA-8952408
R-HSA-2453902	The canonical retinoid cycle in rods (twilight vision)	1	57	0.00399411	0.99392	0.99392	2	25	0.00184135	9606	Homo sapiens	STRA6		R-HSA-2453876;R-HSA-2453863
R-HSA-70268	Pyruvate metabolism	1	57	0.00399411	0.99392	0.99392	1	15	0.00110481	9606	Homo sapiens	PDK1		R-HSA-203946
R-HSA-380108	Chemokine receptors bind chemokines	1	57	0.00399411	0.99392	0.99392	1	19	0.00139943	9606	Homo sapiens	ACKR3		R-HSA-374214
R-HSA-983705	Signaling by the B Cell Receptor (BCR)	8	189	0.0132436	0.994402	0.994402	23	44	0.00324077	9606	Homo sapiens	LYN;CD79A;PSMC4;NFATC2;FYN;NFATC1;CARD11;NFKBIB		R-HSA-9606162;R-HSA-9606163;R-HSA-5690740;R-HSA-2025882;R-HSA-1168635;R-HSA-1112666;R-HSA-1168637;R-HSA-1168638;R-HSA-1168641;R-HSA-1168640;R-HSA-983709;R-HSA-1168643;R-HSA-1168642;R-HSA-983707;R-HSA-1168644;R-HSA-9606151;R-HSA-5690702;R-HSA-983703;R-HSA-983700;R-HSA-5690701;R-HSA-2025890;R-HSA-9606159;R-HSA-983696
R-HSA-391251	Protein folding	3	102	0.00714736	0.994424	0.994424	7	28	0.00206231	9606	Homo sapiens	GNG4;STAT3;PDCL		R-HSA-8850534;R-HSA-390470;R-HSA-6814418;R-HSA-8850560;R-HSA-8850527;R-HSA-6814121;R-HSA-6814409
R-HSA-2162123	Synthesis of Prostaglandins (PG) and Thromboxanes (TX)	1	58	0.00406419	0.994441	0.994441	3	32	0.00235693	9606	Homo sapiens	PTGS1		R-HSA-140355;R-HSA-140359;R-HSA-2314678
R-HSA-70895	Branched-chain amino acid catabolism	1	58	0.00406419	0.994441	0.994441	1	23	0.00169404	9606	Homo sapiens	EHD3		R-HSA-70881
R-HSA-212165	Epigenetic regulation of gene expression	5	139	0.00974003	0.9945	0.9945	20	34	0.00250424	9606	Homo sapiens	HIST1H2BJ;HIST1H2AD;HIST1H2BG;HIST1H3D		R-HSA-5334097;R-HSA-427527;R-HSA-5334160;R-HSA-5334099;R-HSA-212263;R-HSA-5334164;R-HSA-5250938;R-HSA-5227490;R-HSA-212269;R-HSA-433672;R-HSA-427528;R-HSA-427336;R-HSA-427337;R-HSA-427383;R-HSA-5334179;R-HSA-5334151;R-HSA-5334152;R-HSA-427514;R-HSA-212222;R-HSA-212252
R-HSA-977606	Regulation of Complement cascade	5	139	0.00974003	0.9945	0.9945	14	42	0.00309347	9606	Homo sapiens	C1S;C7;CLU;CD55;C2		R-HSA-8852580;R-HSA-8852481;R-HSA-2530445;R-HSA-8852266;R-HSA-977375;R-HSA-981535;R-HSA-2530453;R-HSA-977629;R-HSA-9021306;R-HSA-2530429;R-HSA-981621;R-HSA-977619;R-HSA-981648;R-HSA-981680
R-HSA-1236394	Signaling by ERBB4	2	82	0.00574592	0.994607	0.994607	12	52	0.00383001	9606	Homo sapiens	ERBB3;NRG4		R-HSA-1250370;R-HSA-1250353;R-HSA-1250357;R-HSA-1250315;R-HSA-1977958;R-HSA-1977959;R-HSA-1251992;R-HSA-1250383;R-HSA-1236398;R-HSA-1250380;R-HSA-1250348;R-HSA-1250220
R-HSA-1222556	ROS and RNS production in phagocytes	2	82	0.00574592	0.994607	0.994607	2	45	0.00331443	9606	Homo sapiens	NOS3;ATP6V0C		R-HSA-418436;R-HSA-1222516
R-HSA-983712	Ion channel transport	9	206	0.0144349	0.994697	0.994697	9	45	0.00331443	9606	Homo sapiens	CAMK2B;ANO1;SCNN1A;TRPV2;TRPV3;ATP2B3;MCOLN2;ATP6V0C;RYR3		R-HSA-427910;R-HSA-9659568;R-HSA-418309;R-HSA-2682349;R-HSA-5252133;R-HSA-2672334;R-HSA-2855020;R-HSA-3295579;R-HSA-2684901
R-HSA-9664417	Leishmania phagocytosis	6	157	0.0110013	0.994747	0.994747	10	27	0.00198866	9606	Homo sapiens	LYN;HCK;ABI2;WIPF1;WIPF3;FYN		R-HSA-9664275;R-HSA-2130194;R-HSA-2197698;R-HSA-2029469;R-HSA-2029466;R-HSA-442592;R-HSA-9664261;R-HSA-2029465;R-HSA-2197691;R-HSA-2197690
R-HSA-9664407	Parasite infection	6	157	0.0110013	0.994747	0.994747	10	27	0.00198866	9606	Homo sapiens	LYN;HCK;ABI2;WIPF1;WIPF3;FYN		R-HSA-9664275;R-HSA-2130194;R-HSA-2197698;R-HSA-2029469;R-HSA-2029466;R-HSA-442592;R-HSA-9664261;R-HSA-2029465;R-HSA-2197691;R-HSA-2197690
R-HSA-9664422	FCGR3A-mediated phagocytosis	6	157	0.0110013	0.994747	0.994747	10	27	0.00198866	9606	Homo sapiens	LYN;HCK;ABI2;WIPF1;WIPF3;FYN		R-HSA-9664275;R-HSA-2130194;R-HSA-2197698;R-HSA-2029469;R-HSA-2029466;R-HSA-442592;R-HSA-9664261;R-HSA-2029465;R-HSA-2197691;R-HSA-2197690
R-HSA-1483206	Glycerophospholipid biosynthesis	10	222	0.015556	0.994764	0.994764	30	133	0.00979598	9606	Homo sapiens	44623;PLA2G12A;PITPNM3;JMJD7-PLA2G4B;PLA2G3;PLA2G4A;GPD1L;44624;NES;MFSD2A		R-HSA-1482646;R-HSA-1482900;R-HSA-1482771;R-HSA-1602398;R-HSA-1482897;R-HSA-1482847;R-HSA-1602377;R-HSA-1482759;R-HSA-1482884;R-HSA-1482691;R-HSA-1602446;R-HSA-1602368;R-HSA-1482828;R-HSA-1482636;R-HSA-1602374;R-HSA-1482825;R-HSA-1482612;R-HSA-8865637;R-HSA-1482547;R-HSA-1602417;R-HSA-1482685;R-HSA-1482745;R-HSA-75889;R-HSA-1482533;R-HSA-1482656;R-HSA-1482862;R-HSA-1482604;R-HSA-1482667;R-HSA-148…
R-HSA-983695	Antigen activates B Cell Receptor (BCR) leading to generation of second messengers	3	103	0.00721743	0.994813	0.994813	10	25	0.00184135	9606	Homo sapiens	LYN;CD79A;FYN		R-HSA-9606162;R-HSA-9606163;R-HSA-983709;R-HSA-983707;R-HSA-9606151;R-HSA-983703;R-HSA-1112666;R-HSA-983700;R-HSA-9606159;R-HSA-983696
R-HSA-2029481	FCGR activation	3	103	0.00721743	0.994813	0.994813	1	6	0.000441924	9606	Homo sapiens	LYN;HCK;FYN		R-HSA-2029459
R-HSA-202433	Generation of second messenger molecules	1	59	0.00413426	0.994918	0.994918	2	17	0.00125212	9606	Homo sapiens	FYB		R-HSA-430135;R-HSA-430201
R-HSA-197264	Nicotinamide salvaging	1	59	0.00413426	0.994918	0.994918	1	12	0.000883848	9606	Homo sapiens	CARKD		R-HSA-6806967
R-HSA-69541	Stabilization of p53	1	59	0.00413426	0.994918	0.994918	1	15	0.00110481	9606	Homo sapiens	PSMC4		R-HSA-264458
R-HSA-2514856	The phototransduction cascade	1	59	0.00413426	0.994918	0.994918	1	27	0.00198866	9606	Homo sapiens	PRKCQ		R-HSA-74615
R-HSA-416476	G alpha (q) signalling events	14	284	0.0199005	0.995003	0.995003	11	35	0.00257789	9606	Homo sapiens	DAGLA;ANXA1;RGS16;F2R;LPAR1;GRPR;RGS5;EDNRA;GRK5;GNG4;F2RL1;PRKCQ;DGKI;PROK1		R-HSA-8982025;R-HSA-749448;R-HSA-425861;R-HSA-8982026;R-HSA-426240;R-HSA-426032;R-HSA-749452;R-HSA-416510;R-HSA-8982017;R-HSA-750993;R-HSA-379048
R-HSA-176408	Regulation of APC/C activators between G1/S and early anaphase	2	83	0.00581599	0.995018	0.995018	5	14	0.00103116	9606	Homo sapiens	PSMC4;UBE2E1		R-HSA-188371;R-HSA-174139;R-HSA-174203;R-HSA-141423;R-HSA-174079
R-HSA-8852276	The role of GTSE1 in G2/M progression after G2 checkpoint	2	83	0.00581599	0.995018	0.995018	2	10	0.00073654	9606	Homo sapiens	FKBPL;PSMC4		R-HSA-8852354;R-HSA-8852362
R-HSA-8932339	ROS sensing by NFE2L2	1	60	0.00420433	0.995354	0.995354	1	8	0.000589232	9606	Homo sapiens	PSMC4		R-HSA-8932355
R-HSA-9020591	Interleukin-12 signaling	2	84	0.00588606	0.995397	0.995397	1	56	0.00412462	9606	Homo sapiens	ANXA2		R-HSA-8950480
R-HSA-202424	Downstream TCR signaling	4	124	0.00868895	0.995488	0.995488	17	24	0.0017677	9606	Homo sapiens	PSMC4;PRKCQ;CARD11;PDK1		R-HSA-202307;R-HSA-202466;R-HSA-202534;R-HSA-202437;R-HSA-202500;R-HSA-202443;R-HSA-202472;R-HSA-202222;R-HSA-202478;R-HSA-202510;R-HSA-202453;R-HSA-202164;R-HSA-202459;R-HSA-202394;R-HSA-5607724;R-HSA-202489;R-HSA-202328
R-HSA-5610787	Hedgehog 'off' state	4	124	0.00868895	0.995488	0.995488	8	32	0.00235693	9606	Homo sapiens	PSMC4;PTCH1;ADCY2		R-HSA-5610757;R-HSA-5610727;R-HSA-5610758;R-HSA-5610754;R-HSA-5612508;R-HSA-5612510;R-HSA-5610760;R-HSA-5610763
R-HSA-9012999	RHO GTPase cycle	26	460	0.0322332	0.995711	0.995711	42	91	0.00670251	9606	Homo sapiens	GRB7;DOCK3;WIPF1;WIPF3;ARHGAP1;ARHGAP18;UACA;PREX2;STK10;DOCK11;GJA1;SH3BP1;SH3PXD2A;SLITRK3;WDR91;ARHGDIB;RHPN1;PAK7;EPSTI1;SLITRK5;EFHD1;MPP7;FMNL2;ABI2;RHOJ;EPHA2		R-HSA-9018766;R-HSA-9018754;R-HSA-8981637;R-HSA-9693214;R-HSA-9018758;R-HSA-9013145;R-HSA-9014296;R-HSA-9013144;R-HSA-9013147;R-HSA-9693125;R-HSA-9013022;R-HSA-9013009;R-HSA-9017488;R-HSA-9696266;R-HSA-8980691;R-HSA-9017491;R-HSA-9696271;R-HSA-9693198;R-HSA-9013143;R-HSA-9014295;R-HSA-9014294;R-HSA-9696268;R-HSA-9013161;R-HSA-9018794;R-HSA-9013024;R-HSA-9017507;R-HSA-9012835;R-HSA-9014434;R-HSA-9…
R-HSA-9024446	NR1H2 and NR1H3-mediated signaling	2	85	0.00595613	0.995748	0.995748	2	60	0.00441924	9606	Homo sapiens	FABP6		R-HSA-9631296;R-HSA-9607342
R-HSA-9639288	Amino acids regulate mTORC1	1	61	0.0042744	0.995753	0.995753	8	12	0.000883848	9606	Homo sapiens	ATP6V0C		R-HSA-9640195;R-HSA-9640167;R-HSA-9639286;R-HSA-9646468;R-HSA-9640168;R-HSA-9645608;R-HSA-9640175;R-HSA-9645598
R-HSA-5362768	Hh mutants are degraded by ERAD	1	61	0.0042744	0.995753	0.995753	1	6	0.000441924	9606	Homo sapiens	PSMC4		R-HSA-5387392
R-HSA-5676590	NIK-->noncanonical NF-kB signaling	1	61	0.0042744	0.995753	0.995753	1	9	0.000662886	9606	Homo sapiens	PSMC4		R-HSA-5607731
R-HSA-5610780	Degradation of GLI1 by the proteasome	1	62	0.00434447	0.996117	0.996117	2	6	0.000441924	9606	Homo sapiens	PSMC4		R-HSA-5610758;R-HSA-5610760
R-HSA-5610785	GLI3 is processed to GLI3R by the proteasome	1	62	0.00434447	0.996117	0.996117	1	5	0.00036827	9606	Homo sapiens	PSMC4		R-HSA-5610754
R-HSA-5610783	Degradation of GLI2 by the proteasome	1	62	0.00434447	0.996117	0.996117	1	5	0.00036827	9606	Homo sapiens	PSMC4		R-HSA-5610757
R-HSA-187577	SCF(Skp2)-mediated degradation of p27/p21	1	62	0.00434447	0.996117	0.996117	1	7	0.000515578	9606	Homo sapiens	PSMC4		R-HSA-187574
R-HSA-4551638	SUMOylation of chromatin organization proteins	1	62	0.00434447	0.996117	0.996117	2	15	0.00110481	9606	Homo sapiens	HDAC4		R-HSA-4615987;R-HSA-4615872
R-HSA-2730905	Role of LAT2/NTAL/LAB on calcium mobilization	3	107	0.00749772	0.996124	0.996124	3	7	0.000515578	9606	Homo sapiens	LYN;FYN;PDK1		R-HSA-2730860;R-HSA-202164;R-HSA-2730884
R-HSA-190236	Signaling by FGFR	3	107	0.00749772	0.996124	0.996124	2	142	0.0104589	9606	Homo sapiens	SPRED2;FLRT2;FLRT3		R-HSA-5656064;R-HSA-5654510
R-HSA-425366	Transport of bile salts and organic acids, metal ions and amine compounds	6	163	0.0114218	0.996365	0.996365	6	67	0.00493482	9606	Homo sapiens	SLC14A1;SLC47A1;SLC39A8;EMB;SLC6A1;RUNX1		R-HSA-549241;R-HSA-444007;R-HSA-433698;R-HSA-442387;R-HSA-444126;R-HSA-434650
R-HSA-6811436	COPI-independent Golgi-to-ER retrograde traffic	1	63	0.00441455	0.996451	0.996451	1	7	0.000515578	9606	Homo sapiens	PLA2G4A		R-HSA-8848484
R-HSA-913531	Interferon Signaling	21	394	0.0276084	0.996452	0.996452	21	69	0.00508212	9606	Homo sapiens	CAMK2B;EGR1;UBE2E1;ISG15;IFIT3;HERC5;IRF1;IRF6;GBP2;ZNF225;GBP1;GBP4;GBP3		R-HSA-1678841;R-HSA-936462;R-HSA-1169395;R-HSA-1678843;R-HSA-1169394;R-HSA-1678842;R-HSA-1169397;R-HSA-1169399;R-HSA-1169398;R-HSA-1169403;R-HSA-1169307;R-HSA-1176059;R-HSA-1031716;R-HSA-1169402;R-HSA-1169405;R-HSA-1169404;R-HSA-1031713;R-HSA-1169406;R-HSA-1015702;R-HSA-1015699;R-HSA-909552
R-HSA-6798695	Neutrophil degranulation	27	480	0.0336346	0.99661	0.99661	10	10	0.00073654	9606	Homo sapiens	SNAP25;FRMPD3;CTSZ;HP;ADAMTS4;STK10;GLIPR1;CREG1;MLEC;CTSH;CD36;CD55;CD33;CTSB;CD97;MME;ANXA2;FUCA1;TNFRSF1B;ATAD3B;OSCAR;VAMP8;NFASC;GAL;CRISPLD2;PADI2;ATP6V0C		R-HSA-6798743;R-HSA-6799350;R-HSA-6798739;R-HSA-6800434;R-HSA-6798751;R-HSA-6798749;R-HSA-6798748;R-HSA-6798747;R-HSA-6800426;R-HSA-6798745
R-HSA-674695	RNA Polymerase II Pre-transcription Events	2	88	0.00616635	0.996651	0.996651	8	17	0.00125212	9606	Homo sapiens	PAF1;SUPT5H		R-HSA-113409;R-HSA-113411;R-HSA-112434;R-HSA-113429;R-HSA-113413;R-HSA-113414;R-HSA-112392;R-HSA-112395
R-HSA-69202	Cyclin E associated events during G1/S transition	2	88	0.00616635	0.996651	0.996651	2	20	0.00147308	9606	Homo sapiens	PSMC4;CABLES1		R-HSA-187574;R-HSA-69195
R-HSA-202403	TCR signaling	5	147	0.0103006	0.996717	0.996717	19	52	0.00383001	9606	Homo sapiens	PSMC4;PRKCQ;FYB;CARD11;PDK1		R-HSA-202307;R-HSA-202466;R-HSA-202534;R-HSA-202437;R-HSA-202500;R-HSA-202443;R-HSA-202472;R-HSA-202222;R-HSA-202478;R-HSA-202510;R-HSA-430135;R-HSA-202453;R-HSA-202164;R-HSA-202459;R-HSA-202394;R-HSA-5607724;R-HSA-202489;R-HSA-202328;R-HSA-430201
R-HSA-5387390	Hh mutants abrogate ligand secretion	1	64	0.00448462	0.996755	0.996755	1	7	0.000515578	9606	Homo sapiens	PSMC4		R-HSA-5387392
R-HSA-6796648	TP53 Regulates Transcription of DNA Repair Genes	2	89	0.00623642	0.996908	0.996908	5	17	0.00125212	9606	Homo sapiens	FOS;SUPT5H		R-HSA-6797606;R-HSA-6797616;R-HSA-6797712;R-HSA-6806412;R-HSA-6806394
R-HSA-9663891	Selective autophagy	2	89	0.00623642	0.996908	0.996908	2	48	0.00353539	9606	Homo sapiens	EPAS1;PRKAG2		R-HSA-9664871;R-HSA-9613530
R-HSA-429914	Deadenylation-dependent mRNA decay	1	65	0.00455469	0.997034	0.997034	3	10	0.00073654	9606	Homo sapiens	LSM3		R-HSA-429860;R-HSA-429845;R-HSA-429978
R-HSA-8935690	Digestion	1	65	0.00455469	0.997034	0.997034	2	24	0.0017677	9606	Homo sapiens	ADAMTS4		R-HSA-189102;R-HSA-191116
R-HSA-69656	Cyclin A:Cdk2-associated events at S phase entry	2	90	0.0063065	0.997146	0.997146	2	19	0.00139943	9606	Homo sapiens	PSMC4;CABLES1		R-HSA-187574;R-HSA-174164
R-HSA-390918	Peroxisomal lipid metabolism	2	90	0.0063065	0.997146	0.997146	2	35	0.00257789	9606	Homo sapiens	ACOX2;CROT		R-HSA-389889;R-HSA-390281
R-HSA-1483249	Inositol phosphate metabolism	2	90	0.0063065	0.997146	0.997146	1	71	0.00522943	9606	Homo sapiens	ITPKC		R-HSA-1855153
R-HSA-446219	Synthesis of substrates in N-glycan biosythesis	4	131	0.00917945	0.997209	0.997209	4	49	0.00360904	9606	Homo sapiens	ST6GAL1;GAL;ST8SIA1;ST8SIA4		R-HSA-4085033;R-HSA-4084999;R-HSA-9638120;R-HSA-4084978
R-HSA-194441	Metabolism of non-coding RNA	1	66	0.00462476	0.997288	0.997288	5	6	0.000441924	9606	Homo sapiens	SNRPG;SNRPGP15		R-HSA-191763;R-HSA-191830;R-HSA-191786;R-HSA-191784;R-HSA-191790
R-HSA-191859	snRNP Assembly	1	66	0.00462476	0.997288	0.997288	5	6	0.000441924	9606	Homo sapiens	SNRPG;SNRPGP15		R-HSA-191763;R-HSA-191830;R-HSA-191786;R-HSA-191784;R-HSA-191790
R-HSA-4608870	Asymmetric localization of PCP proteins	1	66	0.00462476	0.997288	0.997288	1	7	0.000515578	9606	Homo sapiens	PSMC4		R-HSA-4608855
R-HSA-9725370	Signaling by ALK fusions and activated point mutants	1	66	0.00462476	0.997288	0.997288	4	29	0.00213597	9606	Homo sapiens	STAT3		R-HSA-9712085;R-HSA-9701810;R-HSA-9725357;R-HSA-9712079
R-HSA-5607761	Dectin-1 mediated noncanonical NF-kB signaling	1	66	0.00462476	0.997288	0.997288	1	9	0.000662886	9606	Homo sapiens	PSMC4		R-HSA-5607731
R-HSA-9700206	Signaling by ALK in cancer	1	66	0.00462476	0.997288	0.997288	4	37	0.0027252	9606	Homo sapiens	STAT3		R-HSA-9712085;R-HSA-9701810;R-HSA-9725357;R-HSA-9712079
R-HSA-1483255	PI Metabolism	3	112	0.00784808	0.997315	0.997315	8	89	0.0065552	9606	Homo sapiens	PIP4K2A;PIP5K1B;RAB5A		R-HSA-8871366;R-HSA-1675773;R-HSA-6811522;R-HSA-1676145;R-HSA-1675776;R-HSA-1676082;R-HSA-1675810;R-HSA-1676134
R-HSA-195253	Degradation of beta-catenin by the destruction complex	2	91	0.00637657	0.997365	0.997365	5	23	0.00169404	9606	Homo sapiens	PSMC4;LEF1		R-HSA-8944349;R-HSA-8944352;R-HSA-4641231;R-HSA-2130282;R-HSA-5229348
R-HSA-8957322	Metabolism of steroids	16	328	0.0229837	0.997432	0.997432	29	244	0.0179716	9606	Homo sapiens	HMGCS1;AKR1C1;HSD17B3;ELOVL6;ABCC9;CYP7B1;CYP24A1;ACOX2;FABP6;CYP21A2;ALB;PPIL3;MBTPS2		R-HSA-2426149;R-HSA-9733973;R-HSA-1655835;R-HSA-192065;R-HSA-2426150;R-HSA-9733969;R-HSA-193800;R-HSA-192335;R-HSA-191323;R-HSA-193816;R-HSA-193369;R-HSA-9733960;R-HSA-193758;R-HSA-192160;R-HSA-192097;R-HSA-209765;R-HSA-191972;R-HSA-192036;R-HSA-193064;R-HSA-194153;R-HSA-193964;R-HSA-192051;R-HSA-1655848;R-HSA-1655851;R-HSA-193841;R-HSA-193781;R-HSA-9733545;R-HSA-193981;R-HSA-193789
R-HSA-162909	Host Interactions of HIV factors	5	151	0.0105809	0.997473	0.997473	14	54	0.00397731	9606	Homo sapiens	HCK;PSMC4;FYN;AP1S3;EMB		R-HSA-180739;R-HSA-182279;R-HSA-165028;R-HSA-165034;R-HSA-182286;R-HSA-200908;R-HSA-165043;R-HSA-165047;R-HSA-182263;R-HSA-180885;R-HSA-200858;R-HSA-180603;R-HSA-165055;R-HSA-180573
R-HSA-5621481	C-type lectin receptors (CLRs)	8	203	0.0142247	0.997482	0.997482	8	68	0.00500847	9606	Homo sapiens	LYN;CLEC4M;PSMC4;NFATC2;FYN;NFATC1;CARD11;PDK1		R-HSA-8858500;R-HSA-5624486;R-HSA-202534;R-HSA-5607731;R-HSA-2730849;R-HSA-5607724;R-HSA-2730867;R-HSA-5621355
R-HSA-73856	RNA Polymerase II Transcription Termination	1	67	0.00469484	0.997521	0.997521	2	4	0.000294616	9606	Homo sapiens	SNRPG;SNRPGP15		R-HSA-77586;R-HSA-111437
R-HSA-453276	Regulation of mitotic cell cycle	2	92	0.00644664	0.997568	0.997568	30	40	0.00294616	9606	Homo sapiens	PSMC4;UBE2E1		R-HSA-174144;R-HSA-174088;R-HSA-174157;R-HSA-179410;R-HSA-174227;R-HSA-188371;R-HSA-174224;R-HSA-9686980;R-HSA-174171;R-HSA-174104;R-HSA-174105;R-HSA-179417;R-HSA-174238;R-HSA-188191;R-HSA-179421;R-HSA-174119;R-HSA-174058;R-HSA-9686969;R-HSA-174120;R-HSA-174057;R-HSA-174121;R-HSA-174255;R-HSA-141423;R-HSA-174195;R-HSA-174070;R-HSA-174132;R-HSA-174202;R-HSA-174139;R-HSA-174203;R-HSA-174079
R-HSA-174143	APC/C-mediated degradation of cell cycle proteins	2	92	0.00644664	0.997568	0.997568	30	40	0.00294616	9606	Homo sapiens	PSMC4;UBE2E1		R-HSA-174144;R-HSA-174088;R-HSA-174157;R-HSA-179410;R-HSA-174227;R-HSA-188371;R-HSA-174224;R-HSA-9686980;R-HSA-174171;R-HSA-174104;R-HSA-174105;R-HSA-179417;R-HSA-174238;R-HSA-188191;R-HSA-179421;R-HSA-174119;R-HSA-174058;R-HSA-9686969;R-HSA-174120;R-HSA-174057;R-HSA-174121;R-HSA-174255;R-HSA-141423;R-HSA-174195;R-HSA-174070;R-HSA-174132;R-HSA-174202;R-HSA-174139;R-HSA-174203;R-HSA-174079
R-HSA-983168	Antigen processing: Ubiquitination & Proteasome degradation	15	315	0.0220727	0.997673	0.997673	6	9	0.000662886	9606	Homo sapiens	UBE2H;FBXO2;UBE2E1;UBE2E2;RNF6;KLHL41;KLHL20;HERC5;FBXO40;PSMC4;ASB9;RNF182;LONRF1;SPSB4		R-HSA-983150;R-HSA-983147;R-HSA-983157;R-HSA-983156;R-HSA-983140;R-HSA-983152
R-HSA-8978934	Metabolism of cofactors	1	68	0.00476491	0.997734	0.997734	2	28	0.00206231	9606	Homo sapiens	NOS3		R-HSA-1497796;R-HSA-1497784
R-HSA-9633012	Response of EIF2AK4 (GCN2) to amino acid deficiency	3	115	0.0080583	0.99785	0.99785	3	16	0.00117846	9606	Homo sapiens	TRIB1;ATF3		R-HSA-9635892;R-HSA-9635912;R-HSA-1791173
R-HSA-8856825	Cargo recognition for clathrin-mediated endocytosis	3	115	0.0080583	0.99785	0.99785	2	15	0.00110481	9606	Homo sapiens	VAMP8;SGIP1;CLTCL1		R-HSA-8867613;R-HSA-8866283
R-HSA-69481	G2/M Checkpoints	5	154	0.0107911	0.997927	0.997927	5	24	0.0017677	9606	Homo sapiens	HIST1H2BJ;PSMC4;ORC2;HIST1H2BG		R-HSA-5683735;R-HSA-69891;R-HSA-8852354;R-HSA-176298;R-HSA-176318
R-HSA-6807505	RNA polymerase II transcribes snRNA genes	2	94	0.00658678	0.997929	0.997929	11	11	0.000810194	9606	Homo sapiens	POU2F2;SUPT5H		R-HSA-6814549;R-HSA-6814885;R-HSA-6814559;R-HSA-6810239;R-HSA-6810238;R-HSA-6814555;R-HSA-6810235;R-HSA-6814554;R-HSA-6810234;R-HSA-6810233;R-HSA-6807496
R-HSA-8956321	Nucleotide salvage	1	69	0.00483498	0.997929	0.997929	1	22	0.00162039	9606	Homo sapiens	AMPD2		R-HSA-76590
R-HSA-352230	Amino acid transport across the plasma membrane	1	69	0.00483498	0.997929	0.997929	1	36	0.00265154	9606	Homo sapiens	SLC7A8		R-HSA-352191
R-HSA-6804756	Regulation of TP53 Activity through Phosphorylation	2	95	0.00665686	0.998089	0.998089	3	26	0.001915	9606	Homo sapiens	TP53INP1;PRKAG2		R-HSA-3215251;R-HSA-6799409;R-HSA-6805470
R-HSA-6784531	tRNA processing in the nucleus	1	70	0.00490505	0.998107	0.998107	1	7	0.000515578	9606	Homo sapiens	TSEN2		R-HSA-5696813
R-HSA-69580	p53-Dependent G1/S DNA damage checkpoint	1	70	0.00490505	0.998107	0.998107	1	22	0.00162039	9606	Homo sapiens	PSMC4		R-HSA-264458
R-HSA-69563	p53-Dependent G1 DNA Damage Response	1	70	0.00490505	0.998107	0.998107	1	22	0.00162039	9606	Homo sapiens	PSMC4		R-HSA-264458
R-HSA-166658	Complement cascade	5	156	0.0109313	0.998184	0.998184	26	71	0.00522943	9606	Homo sapiens	C1S;C7;CLU;CD55;C2		R-HSA-173636;R-HSA-8852481;R-HSA-166795;R-HSA-166792;R-HSA-173709;R-HSA-977375;R-HSA-981535;R-HSA-977629;R-HSA-173723;R-HSA-173720;R-HSA-2530429;R-HSA-977619;R-HSA-981648;R-HSA-173725;R-HSA-8852580;R-HSA-166817;R-HSA-166753;R-HSA-2530445;R-HSA-8852266;R-HSA-173680;R-HSA-2530453;R-HSA-9021306;R-HSA-173626;R-HSA-981621;R-HSA-173631;R-HSA-981680
R-HSA-6805567	Keratinization	9	226	0.0158363	0.99826	0.99826	16	34	0.00250424	9606	Homo sapiens	KRT33B;KRT80;KRT18;KRT17;KRT8;KRT7;PCSK6		R-HSA-6806629;R-HSA-6805573;R-HSA-8849797;R-HSA-6814734;R-HSA-6814764;R-HSA-6805546;R-HSA-6806613;R-HSA-6810357;R-HSA-6811539;R-HSA-6814387;R-HSA-6806610;R-HSA-6809393;R-HSA-6809663;R-HSA-8942224;R-HSA-6814298;R-HSA-6810937
R-HSA-73886	Chromosome Maintenance	4	138	0.00966996	0.998286	0.998286	7	38	0.00279885	9606	Homo sapiens	HIST1H2BJ;HIST1H2AD;HIST1H2BG		R-HSA-9670114;R-HSA-606287;R-HSA-9670149;R-HSA-9670101;R-HSA-606289;R-HSA-181450;R-HSA-176700
R-HSA-156584	Cytosolic sulfonation of small molecules	1	72	0.0050452	0.998418	0.998418	6	24	0.0017677	9606	Homo sapiens	SULT2A1		R-HSA-176631;R-HSA-176474;R-HSA-176664;R-HSA-176585;R-HSA-176604;R-HSA-176588
R-HSA-69615	G1/S DNA Damage Checkpoints	1	72	0.0050452	0.998418	0.998418	2	26	0.001915	9606	Homo sapiens	PSMC4		R-HSA-69600;R-HSA-264458
R-HSA-8963743	Digestion and absorption	1	72	0.0050452	0.998418	0.998418	2	30	0.00220962	9606	Homo sapiens	ADAMTS4		R-HSA-189102;R-HSA-191116
R-HSA-5689603	UCH proteinases	2	98	0.00686707	0.998499	0.998499	3	11	0.000810194	9606	Homo sapiens	PSMC4;HIST1H2AD		R-HSA-5690790;R-HSA-5665854;R-HSA-5665871
R-HSA-9660821	ADORA2B mediated anti-inflammatory cytokines production	5	159	0.0111415	0.998513	0.998513	5	12	0.000883848	9606	Homo sapiens	GNAZ;GNAT3;GNG4;ADCY2;TSHR		R-HSA-9660819;R-HSA-163617;R-HSA-392129;R-HSA-9660824;R-HSA-9660828
R-HSA-211981	Xenobiotics	1	73	0.00511527	0.998554	0.998554	12	22	0.00162039	9606	Homo sapiens	CYP2S1		R-HSA-76416;R-HSA-76354;R-HSA-76434;R-HSA-211991;R-HSA-211910;R-HSA-212005;R-HSA-212004;R-HSA-211988;R-HSA-76475;R-HSA-211929;R-HSA-76397;R-HSA-143468
R-HSA-9694635	Translation of Structural Proteins	1	73	0.00511527	0.998554	0.998554	2	43	0.00316712	9606	Homo sapiens	ST6GAL1		R-HSA-9697018;R-HSA-9694718
R-HSA-9664323	FCGR3A-mediated IL10 synthesis	4	141	0.00988018	0.998612	0.998612	3	20	0.00147308	9606	Homo sapiens	LYN;HCK;FYN;ADCY2		R-HSA-9664275;R-HSA-9664261;R-HSA-111930
R-HSA-5620912	Anchoring of the basal body to the plasma membrane	2	99	0.00693715	0.998616	0.998616	8	9	0.000662886	9606	Homo sapiens	IQCB1;ALB		R-HSA-5626228;R-HSA-5626227;R-HSA-5626220;R-HSA-5626223;R-HSA-5626681;R-HSA-5617816;R-HSA-5626699;R-HSA-5638009
R-HSA-195258	RHO GTPase Effectors	15	326	0.0228435	0.998645	0.998645	32	113	0.0083229	9606	Homo sapiens	HIST1H2BJ;WIPF1;WIPF3;KLC3;FMNL2;ABI2;RHPN1;HIST1H2AD;MYH11;HIST1H2BG;EMB;HIST1H3D;PDK1		R-HSA-5665751;R-HSA-5665748;R-HSA-2029469;R-HSA-2029466;R-HSA-5623632;R-HSA-5672083;R-HSA-5666129;R-HSA-2029465;R-HSA-5625883;R-HSA-5625797;R-HSA-5625796;R-HSA-5668932;R-HSA-5667008;R-HSA-2197691;R-HSA-2197690;R-HSA-5625870;R-HSA-2197698;R-HSA-5668978;R-HSA-442592;R-HSA-5666160;R-HSA-5623667;R-HSA-419232;R-HSA-5665727;R-HSA-5625849;R-HSA-5625848;R-HSA-5625784;R-HSA-5666169;R-HSA-2130194;R-HSA-567…
R-HSA-191273	Cholesterol biosynthesis	1	74	0.00518534	0.998678	0.998678	1	34	0.00250424	9606	Homo sapiens	HMGCS1		R-HSA-191323
R-HSA-189445	Metabolism of porphyrins	1	76	0.00532549	0.998895	0.998895	3	42	0.00309347	9606	Homo sapiens	ALB		R-HSA-9661425;R-HSA-9661419;R-HSA-9661432
R-HSA-927802	Nonsense-Mediated Decay (NMD)	3	124	0.00868895	0.998903	0.998903	6	6	0.000441924	9606	Homo sapiens	SMG9;GSPT2;SMG5		R-HSA-927836;R-HSA-927789;R-HSA-927832;R-HSA-927830;R-HSA-927813;R-HSA-927889
R-HSA-975957	Nonsense Mediated Decay (NMD) enhanced by the Exon Junction Complex (EJC)	3	124	0.00868895	0.998903	0.998903	5	5	0.00036827	9606	Homo sapiens	SMG9;GSPT2;SMG5		R-HSA-927836;R-HSA-927832;R-HSA-927830;R-HSA-927813;R-HSA-927889
R-HSA-5693567	HDR through Homologous Recombination (HRR) or Single Strand Annealing (SSA)	3	124	0.00868895	0.998903	0.998903	2	42	0.00309347	9606	Homo sapiens	HIST1H2BJ;HIST1H2BG		R-HSA-5684071;R-HSA-5684052
R-HSA-2454202	Fc epsilon receptor (FCERI) signaling	9	235	0.016467	0.998965	0.998965	31	65	0.00478751	9606	Homo sapiens	LYN;PSMC4;NFATC2;PRKCQ;FYN;NFATC1;FOS;CARD11;PDK1		R-HSA-2730861;R-HSA-2730860;R-HSA-2454240;R-HSA-2730863;R-HSA-2730862;R-HSA-2730849;R-HSA-2730851;R-HSA-450325;R-HSA-2730876;R-HSA-2730864;R-HSA-2730867;R-HSA-202328;R-HSA-2730888;R-HSA-202534;R-HSA-2454208;R-HSA-2730882;R-HSA-2730884;R-HSA-2730886;R-HSA-2730904;R-HSA-2730843;R-HSA-450292;R-HSA-202164;R-HSA-2730833;R-HSA-5607724;R-HSA-2730899;R-HSA-2730835;R-HSA-2454239;R-HSA-2730900;R-HSA-273083…
R-HSA-204005	COPII-mediated vesicle transport	1	77	0.00539556	0.99899	0.99899	10	16	0.00117846	9606	Homo sapiens	CTSZ		R-HSA-5694439;R-HSA-5694418;R-HSA-203973;R-HSA-5694417;R-HSA-5694446;R-HSA-5694527;R-HSA-204008;R-HSA-5694522;R-HSA-5694441;R-HSA-5694409
R-HSA-1257604	PIP3 activates AKT signaling	14	319	0.022353	0.999123	0.999123	15	86	0.00633424	9606	Homo sapiens	EGR1;PDGFA;ESR2;PREX2;ERBB3;NRG4;PSMC4;SALL4;PIP4K2A;FYN;PIP5K1B;ZNF225;TRIB1;PDK1		R-HSA-8944104;R-HSA-2317314;R-HSA-2219524;R-HSA-8944078;R-HSA-1676082;R-HSA-8943780;R-HSA-2316429;R-HSA-199443;R-HSA-2316434;R-HSA-198640;R-HSA-8850961;R-HSA-8850992;R-HSA-8943728;R-HSA-1675776;R-HSA-198270
R-HSA-9006925	Intracellular signaling by second messengers	17	366	0.0256464	0.999146	0.999146	21	114	0.00839655	9606	Homo sapiens	CAMK2B;EGR1;PDE1B;PDGFA;ADCY2;ESR2;PREX2;ERBB3;NRG4;PSMC4;SALL4;PIP4K2A;FYN;PIP5K1B;ZNF225;TRIB1;PDK1		R-HSA-8944104;R-HSA-2317314;R-HSA-442725;R-HSA-2219524;R-HSA-8944078;R-HSA-1676082;R-HSA-8943780;R-HSA-2316429;R-HSA-199443;R-HSA-2316434;R-HSA-111955;R-HSA-198640;R-HSA-111956;R-HSA-8850961;R-HSA-8850992;R-HSA-8943728;R-HSA-1675776;R-HSA-111930;R-HSA-198270;R-HSA-9617583;R-HSA-444792
R-HSA-77289	Mitochondrial Fatty Acid Beta-Oxidation	2	105	0.00735758	0.999149	0.999149	2	47	0.00346174	9606	Homo sapiens	ACOT2		R-HSA-5690066;R-HSA-5690043
R-HSA-351202	Metabolism of polyamines	1	80	0.00560577	0.999229	0.999229	1	17	0.00125212	9606	Homo sapiens	PSMC4		R-HSA-353125
R-HSA-2871809	FCERI mediated Ca+2 mobilization	3	129	0.00903931	0.999248	0.999248	4	11	0.000810194	9606	Homo sapiens	LYN;NFATC2;NFATC1		R-HSA-2730888;R-HSA-2730833;R-HSA-2730849;R-HSA-2730867
R-HSA-5689880	Ub-specific processing proteases	7	206	0.0144349	0.99926	0.99926	5	40	0.00294616	9606	Homo sapiens	HIST1H2BJ;PSMC4;USP2;HIST1H2AD;HIST1H2BG		R-HSA-5689972;R-HSA-5689539;R-HSA-5696960;R-HSA-5690080;R-HSA-5690157
R-HSA-8951664	Neddylation	9	241	0.0168874	0.999273	0.999273	12	31	0.00228327	9606	Homo sapiens	FBXO40;PSMC4;EPAS1;FBXO2;ASB9;KLHL41;KLHL20;SPSB4		R-HSA-8956040;R-HSA-8956200;R-HSA-8956184;R-HSA-8955241;R-HSA-8955289;R-HSA-8956106;R-HSA-8952618;R-HSA-8952044;R-HSA-8952620;R-HSA-8956140;R-HSA-8952039;R-HSA-8956103
R-HSA-6811434	COPI-dependent Golgi-to-ER retrograde traffic	2	107	0.00749772	0.999277	0.999277	2	11	0.000810194	9606	Homo sapiens	KLC3		R-HSA-6811426;R-HSA-6811423
R-HSA-9609507	Protein localization	5	170	0.0119123	0.999294	0.999294	16	53	0.00390366	9606	Homo sapiens	ACOX2;ACOT2;PAF1;PIPOX;CROT		R-HSA-9033514;R-HSA-9033485;R-HSA-9033516;R-HSA-9033505;R-HSA-9603775;R-HSA-9603804;R-HSA-8953946;R-HSA-9033499;R-HSA-9033533;R-HSA-8953917;R-HSA-9033233;R-HSA-9033235;R-HSA-9603784;R-HSA-9033236;R-HSA-9033527;R-HSA-9033238
R-HSA-167172	Transcription of the HIV genome	1	81	0.00567585	0.999295	0.999295	25	47	0.00346174	9606	Homo sapiens	SUPT5H		R-HSA-167181;R-HSA-170706;R-HSA-170704;R-HSA-167191;R-HSA-167192;R-HSA-167196;R-HSA-167197;R-HSA-167459;R-HSA-167076;R-HSA-167077;R-HSA-167147;R-HSA-167083;R-HSA-167150;R-HSA-167087;R-HSA-167148;R-HSA-167084;R-HSA-167085;R-HSA-167090;R-HSA-167282;R-HSA-167153;R-HSA-167478;R-HSA-167284;R-HSA-167288;R-HSA-167481;R-HSA-167292
R-HSA-1445148	Translocation of SLC2A4 (GLUT4) to the plasma membrane	1	81	0.00567585	0.999295	0.999295	1	15	0.00110481	9606	Homo sapiens	PRKAG2		R-HSA-1454699
R-HSA-5693538	Homology Directed Repair	3	130	0.00910938	0.999303	0.999303	2	50	0.0036827	9606	Homo sapiens	HIST1H2BJ;HIST1H2BG		R-HSA-5684071;R-HSA-5684052
R-HSA-425397	Transport of vitamins, nucleosides, and related molecules	2	108	0.00756779	0.999333	0.999333	5	39	0.0028725	9606	Homo sapiens	SLCO3A1;SLC29A1		R-HSA-109536;R-HSA-109527;R-HSA-109529;R-HSA-879584;R-HSA-109534
R-HSA-9007101	Rab regulation of trafficking	3	131	0.00917945	0.999354	0.999354	2	35	0.00257789	9606	Homo sapiens	RINL;RAB5A		R-HSA-8854222;R-HSA-8875320
R-HSA-1226099	Signaling by FGFR in disease	1	82	0.00574592	0.999356	0.999356	1	106	0.00780732	9606	Homo sapiens	STAT3		R-HSA-1888198
R-HSA-69239	Synthesis of DNA	3	133	0.0093196	0.999445	0.999445	4	26	0.001915	9606	Homo sapiens	PSMC4;ORC2;UBE2E1		R-HSA-68944;R-HSA-68948;R-HSA-69015;R-HSA-69016
R-HSA-196807	Nicotinate metabolism	1	84	0.00588606	0.999462	0.999462	1	29	0.00213597	9606	Homo sapiens	CARKD		R-HSA-6806967
R-HSA-2029480	Fcgamma receptor (FCGR) dependent phagocytosis	6	193	0.0135239	0.999468	0.999468	9	42	0.00309347	9606	Homo sapiens	LYN;HCK;ABI2;WIPF1;WIPF3;FYN		R-HSA-2130194;R-HSA-2197698;R-HSA-2029469;R-HSA-2029466;R-HSA-442592;R-HSA-2029465;R-HSA-2197691;R-HSA-2197690;R-HSA-2029459
R-HSA-69618	Mitotic Spindle Checkpoint	2	111	0.00777801	0.999478	0.999478	5	7	0.000515578	9606	Homo sapiens	UBE2E1;EMB		R-HSA-141409;R-HSA-141431;R-HSA-141422;R-HSA-141439;R-HSA-141423
R-HSA-2871837	FCERI mediated NF-kB activation	5	175	0.0122626	0.999499	0.999499	15	19	0.00139943	9606	Homo sapiens	LYN;PSMC4;PRKCQ;CARD11;PDK1		R-HSA-2730861;R-HSA-202534;R-HSA-2730863;R-HSA-2730882;R-HSA-2730904;R-HSA-2730876;R-HSA-2730864;R-HSA-5607724;R-HSA-2730899;R-HSA-2730835;R-HSA-202328;R-HSA-2730900;R-HSA-2730836;R-HSA-2730903;R-HSA-2730902
R-HSA-9610379	HCMV Late Events	5	175	0.0122626	0.999499	0.999499	3	19	0.00139943	9606	Homo sapiens	CEBPD;HIST1H2BJ;HIST1H2AD;HIST1H2BG;HIST1H3D		R-HSA-9698928;R-HSA-9624033;R-HSA-9698926
R-HSA-5663202	Diseases of signal transduction by growth factor receptors and second messengers	25	498	0.0348959	0.999519	0.999519	80	484	0.0356485	9606	Homo sapiens	LYN;HDAC4;CAMK2B;FGG;STAT3;LRP5;PDGFA;HDAC9;DUSP9;DLL1;DKK2;ESR2;HEYL;SPRED2;NEURL1B;MRAS;ERBB3;NRG4;PSMC4;HEY2;FYN;PDK1		R-HSA-6802919;R-HSA-9656211;R-HSA-9670418;R-HSA-6802918;R-HSA-9670417;R-HSA-9656209;R-HSA-9670416;R-HSA-6802916;R-HSA-9656215;R-HSA-6802914;R-HSA-9656214;R-HSA-6802912;R-HSA-9656212;R-HSA-6802927;R-HSA-9670426;R-HSA-6802926;R-HSA-6802925;R-HSA-6802924;R-HSA-9664664;R-HSA-6802922;R-HSA-6802921;R-HSA-6802935;R-HSA-6802934;R-HSA-2220976;R-HSA-6802933;R-HSA-6802932;R-HSA-2220981;R-HSA-9664646;R-HSA-2…
R-HSA-1483257	Phospholipid metabolism	13	315	0.0220727	0.999535	0.999535	38	218	0.0160566	9606	Homo sapiens	44623;PLA2G12A;PLA2G4A;PLA2G3;44624;PITPNM3;JMJD7-PLA2G4B;PIP4K2A;PIP5K1B;GPD1L;RAB5A;NES;MFSD2A		R-HSA-1482646;R-HSA-8871366;R-HSA-1482900;R-HSA-1482771;R-HSA-1602398;R-HSA-1482897;R-HSA-1482847;R-HSA-1602377;R-HSA-1482759;R-HSA-1482884;R-HSA-1482691;R-HSA-1602446;R-HSA-1602368;R-HSA-1675776;R-HSA-1482828;R-HSA-1482636;R-HSA-1602374;R-HSA-1482825;R-HSA-1482612;R-HSA-8865637;R-HSA-1675773;R-HSA-6811522;R-HSA-1482547;R-HSA-1676145;R-HSA-1602417;R-HSA-1482685;R-HSA-1676082;R-HSA-1482745;R-HSA-7…
R-HSA-383280	Nuclear Receptor transcription pathway	1	86	0.00602621	0.99955	0.99955	2	2	0.000147308	9606	Homo sapiens	ESR2		R-HSA-382096;R-HSA-376419
R-HSA-416482	G alpha (12/13) signalling events	1	86	0.00602621	0.99955	0.99955	4	15	0.00110481	9606	Homo sapiens	GNG4		R-HSA-751019;R-HSA-751039;R-HSA-751027;R-HSA-751029
R-HSA-1266738	Developmental Biology	81	1263	0.0885012	0.999569	0.999569	253	556	0.0409516	9606	Homo sapiens	RET;PCSK6;CHL1;SALL4;MYB;BOC;GRB10;HIST1H2AD;NRCAM;CD36;SCN1B;EPHB3;SEMA6A;UNC5B;KRT8;KRT7;PAX6;UNC5C;DNM1;MED29;RUNX1;DNM3;COL2A1;PRKCQ;ITGA5;HIST1H2BG;EPHA2;GRB7;KRT80;CEBPD;EPHA10;HIST1H2BJ;EPAS1;SDC2;LEF1;GATA6;LPL;GSPT2;CACNA1G;KRT33B;RELN;MED30;FLRT3;CLTCL1;ST8SIA4;PAK7;HOXC4;SLIT3;FYN;MYH11;CTNNA2;NKX6-1;HIST1H3D;LYN;CNTN6;STAT3;NFASC;COL3A1;KRT18;EFNA2;COL5A1;KRT17;LHX2;PSMC4;ITGA10;PLXNB…		R-HSA-525833;R-HSA-6806629;R-HSA-3928633;R-HSA-3928632;R-HSA-3928639;R-HSA-3928627;R-HSA-9618584;R-HSA-3928625;R-HSA-3928624;R-HSA-3928631;R-HSA-3928628;R-HSA-3928617;R-HSA-3928616;R-HSA-3928623;R-HSA-8942224;R-HSA-3928610;R-HSA-3928615;R-HSA-3928614;R-HSA-9634445;R-HSA-3928612;R-HSA-3928602;R-HSA-6805573;R-HSA-3928601;R-HSA-3928600;R-HSA-3928607;R-HSA-418850;R-HSA-3928604;R-HSA-3928595;R-HSA-418…
R-HSA-418594	G alpha (i) signalling events	20	426	0.0298507	0.999573	0.999573	38	74	0.00545039	9606	Homo sapiens	CAMK2B;GNAZ;GPR37;ANXA1;PDE1B;RGS16;PTGER3;LPAR1;PLA2G4A;ADCY2;GPR37L1;SSTR3;RGS5;GNAL;GAL;GNG4;GNAT3;ACKR3;S1PR3;S1PR5		R-HSA-392129;R-HSA-749454;R-HSA-167429;R-HSA-111881;R-HSA-111883;R-HSA-8982019;R-HSA-392206;R-HSA-167433;R-HSA-8982020;R-HSA-112271;R-HSA-392212;R-HSA-751001;R-HSA-111955;R-HSA-111956;R-HSA-420883;R-HSA-8964242;R-HSA-749456;R-HSA-111898;R-HSA-8964311;R-HSA-8964329;R-HSA-442725;R-HSA-8982637;R-HSA-170666;R-HSA-380073;R-HSA-170671;R-HSA-170674;R-HSA-170672;R-HSA-167408;R-HSA-8982012;R-HSA-170676;R-…
R-HSA-9707564	Cytoprotection by HMOX1	4	158	0.0110714	0.999589	0.999589	7	37	0.0027252	9606	Homo sapiens	PSMC4;ALB;STAT3;MAFK		R-HSA-9708557;R-HSA-9707645;R-HSA-9709918;R-HSA-9661432;R-HSA-8932355;R-HSA-9707690;R-HSA-9709883
R-HSA-373076	Class A/1 (Rhodopsin-like receptors)	19	412	0.0288697	0.999598	0.999598	19	160	0.0117846	9606	Homo sapiens	GPR37;ANXA1;PTGER3;F2R;LPAR1;ECE1;GPR37L1;GRPR;SSTR3;TSHR;EDNRA;GAL;F2RL1;ACKR3;PRLHR;S1PR3;S1PR5;PROK1;LPPR1		R-HSA-9731924;R-HSA-419428;R-HSA-374758;R-HSA-374214;R-HSA-8876868;R-HSA-5336182;R-HSA-389026;R-HSA-5336184;R-HSA-391375;R-HSA-391913;R-HSA-388855;R-HSA-389463;R-HSA-444691;R-HSA-388560;R-HSA-391933;R-HSA-6797630;R-HSA-444476;R-HSA-419389;R-HSA-375384
R-HSA-73887	Death Receptor Signalling	4	159	0.0111415	0.999618	0.999618	11	93	0.00684982	9606	Homo sapiens	SMPD3;USP2;TNFRSF10B		R-HSA-140978;R-HSA-5626981;R-HSA-5357776;R-HSA-141139;R-HSA-75187;R-HSA-5357845;R-HSA-5357860;R-HSA-141316;R-HSA-75238;R-HSA-5635741;R-HSA-75146
R-HSA-446193	Biosynthesis of the N-glycan precursor (dolichol lipid-linked oligosaccharide, LLO) and transfer to a nascent protein	4	159	0.0111415	0.999618	0.999618	4	63	0.0046402	9606	Homo sapiens	ST6GAL1;GAL;ST8SIA1;ST8SIA4		R-HSA-4085033;R-HSA-4084999;R-HSA-9638120;R-HSA-4084978
R-HSA-381753	Olfactory Signaling Pathway	2	117	0.00819844	0.999681	0.999681	5	9	0.000662886	9606	Homo sapiens	GNAL;OR7C1		R-HSA-9712183;R-HSA-9712208;R-HSA-9712210;R-HSA-9712201;R-HSA-9712187
R-HSA-166663	Initial triggering of complement	2	120	0.00840866	0.999751	0.999751	5	21	0.00154673	9606	Homo sapiens	C1S;C2		R-HSA-166753;R-HSA-173626;R-HSA-166795;R-HSA-166792;R-HSA-173631
R-HSA-9678108	SARS-CoV-1 Infection	1	93	0.00651671	0.99976	0.99976	1	111	0.00817559	9606	Homo sapiens	ST6GAL1		R-HSA-9683769
R-HSA-3858494	Beta-catenin independent WNT signaling	4	166	0.011632	0.999771	0.999771	11	51	0.00375635	9606	Homo sapiens	PSMC4;GNG4;LEF1;NFATC2;NFATC1		R-HSA-4608855;R-HSA-8944362;R-HSA-4411383;R-HSA-4411365;R-HSA-398193;R-HSA-3965444;R-HSA-3965447;R-HSA-4551465;R-HSA-3965441;R-HSA-4551451;R-HSA-398040
R-HSA-141444	Amplification of signal from unattached kinetochores via a MAD2 inhibitory signal	1	94	0.00658678	0.999781	0.999781	4	4	0.000294616	9606	Homo sapiens	EMB		R-HSA-141409;R-HSA-141431;R-HSA-141422;R-HSA-141439
R-HSA-141424	Amplification of signal from the kinetochores	1	94	0.00658678	0.999781	0.999781	4	4	0.000294616	9606	Homo sapiens	EMB		R-HSA-141409;R-HSA-141431;R-HSA-141422;R-HSA-141439
R-HSA-5668914	Diseases of metabolism	18	409	0.0286595	0.999785	0.999785	25	190	0.0139943	9606	Homo sapiens	SDC2;NOTCH4;BGN;CYP7B1;THSD1;ADAMTS4;ADAMTS15;GAL;CYP24A1;PPP1R3C;ADAMTSL4;CYP21A2;ADAMTS18;CSPG4;NHLRC1;GPC4;ADAMTS9;CHST3		R-HSA-3636919;R-HSA-5602004;R-HSA-9036289;R-HSA-3656254;R-HSA-9036290;R-HSA-3791349;R-HSA-4420365;R-HSA-5602885;R-HSA-3595175;R-HSA-3560804;R-HSA-3797226;R-HSA-3560802;R-HSA-9036061;R-HSA-5096538;R-HSA-3595178;R-HSA-2265534;R-HSA-3595176;R-HSA-4341669;R-HSA-5601976;R-HSA-9036283;R-HSA-3656261;R-HSA-9036285;R-HSA-3656257;R-HSA-6785565;R-HSA-3656267
R-HSA-5693532	DNA Double-Strand Break Repair	4	168	0.0117721	0.999802	0.999802	35	111	0.00817559	9606	Homo sapiens	HIST1H2BJ;EYA2;HIST1H2BG		R-HSA-5682967;R-HSA-5683735;R-HSA-69891;R-HSA-5684052;R-HSA-5682965;R-HSA-5683986;R-HSA-5693599;R-HSA-5682588;R-HSA-5686685;R-HSA-5683930;R-HSA-5682586;R-HSA-5683801;R-HSA-5682629;R-HSA-5683077;R-HSA-5693583;R-HSA-5683405;R-HSA-5686900;R-HSA-5686704;R-HSA-5682992;R-HSA-5693566;R-HSA-5683967;R-HSA-5683964;R-HSA-5683384;R-HSA-5683385;R-HSA-5682598;R-HSA-5682983;R-HSA-5684071;R-HSA-5693602;R-HSA-569…
R-HSA-9717189	Sensory perception of taste	3	147	0.0103006	0.999811	0.999811	12	25	0.00184135	9606	Homo sapiens	GNAT3;SCNN1A;SCN1B		R-HSA-9717396;R-HSA-9717206;R-HSA-9717382;R-HSA-9728752;R-HSA-2672334;R-HSA-9717202;R-HSA-9728723;R-HSA-9728748;R-HSA-9717182;R-HSA-9728697;R-HSA-9728729;R-HSA-9728747
R-HSA-2871796	FCERI mediated MAPK activation	2	124	0.00868895	0.999821	0.999821	4	20	0.00147308	9606	Homo sapiens	LYN;FOS		R-HSA-450292;R-HSA-450325;R-HSA-2730851;R-HSA-2730886
R-HSA-8856688	Golgi-to-ER retrograde transport	3	148	0.0103707	0.999825	0.999825	3	18	0.00132577	9606	Homo sapiens	KLC3;PLA2G4A		R-HSA-8848484;R-HSA-6811426;R-HSA-6811423
R-HSA-173623	Classical antibody-mediated complement activation	1	97	0.006797	0.999833	0.999833	2	2	0.000147308	9606	Homo sapiens	C1S		R-HSA-173626;R-HSA-173631
R-HSA-6807070	PTEN Regulation	4	171	0.0119823	0.999841	0.999841	6	56	0.00412462	9606	Homo sapiens	PREX2;EGR1;PSMC4;SALL4;ZNF225		R-HSA-8944104;R-HSA-8850961;R-HSA-8944078;R-HSA-8850992;R-HSA-8943728;R-HSA-8943780
R-HSA-69206	G1/S Transition	3	150	0.0105108	0.99985	0.99985	10	61	0.00449289	9606	Homo sapiens	PSMC4;ORC2;CABLES1		R-HSA-68960;R-HSA-68914;R-HSA-68917;R-HSA-187574;R-HSA-68916;R-HSA-68919;R-HSA-113638;R-HSA-68918;R-HSA-69195;R-HSA-68940
R-HSA-9711123	Cellular response to chemical stress	6	212	0.0148553	0.999852	0.999852	9	71	0.00522943	9606	Homo sapiens	PSMC4;GPX3;ALB;STAT3;MAFK		R-HSA-3341397;R-HSA-6799695;R-HSA-9708557;R-HSA-9707645;R-HSA-9709918;R-HSA-9661432;R-HSA-8932355;R-HSA-9707690;R-HSA-9709883
R-HSA-4086400	PCP/CE pathway	1	99	0.00693715	0.99986	0.99986	1	24	0.0017677	9606	Homo sapiens	PSMC4		R-HSA-4608855
R-HSA-1236974	ER-Phagosome pathway	4	173	0.0121225	0.999863	0.999863	3	10	0.00073654	9606	Homo sapiens	VAMP8;PSMC4;FGG;CD36		R-HSA-8863895;R-HSA-8863973;R-HSA-1236935
R-HSA-453279	Mitotic G1 phase and G1/S transition	4	173	0.0121225	0.999863	0.999863	11	99	0.00729174	9606	Homo sapiens	LYN;PSMC4;ORC2;CABLES1		R-HSA-68960;R-HSA-68914;R-HSA-68917;R-HSA-187574;R-HSA-68916;R-HSA-68919;R-HSA-8942607;R-HSA-113638;R-HSA-68918;R-HSA-69195;R-HSA-68940
R-HSA-71406	Pyruvate metabolism and Citric Acid (TCA) cycle	1	100	0.00700722	0.999872	0.999872	1	36	0.00265154	9606	Homo sapiens	PDK1		R-HSA-203946
R-HSA-9609690	HCMV Early Events	6	215	0.0150655	0.999879	0.999879	5	12	0.000883848	9606	Homo sapiens	TRIM28;HIST1H2BJ;HIST1H2AD;HIST1H2BG;HIST1H3D		R-HSA-9614816;R-HSA-9621073;R-HSA-9614810;R-HSA-9614811;R-HSA-9623096
R-HSA-975956	Nonsense Mediated Decay (NMD) independent of the Exon Junction Complex (EJC)	1	101	0.00707729	0.999883	0.999883	1	1	7.3654e-05	9606	Homo sapiens	GSPT2		R-HSA-927789
R-HSA-9711097	Cellular response to starvation	4	176	0.0123327	0.99989	0.99989	11	28	0.00206231	9606	Homo sapiens	TRIB1;ATP6V0C;ATF3		R-HSA-9640195;R-HSA-9640167;R-HSA-9639286;R-HSA-9646468;R-HSA-9635892;R-HSA-9635912;R-HSA-9640168;R-HSA-9645608;R-HSA-9640175;R-HSA-9645598;R-HSA-1791173
R-HSA-156842	Eukaryotic Translation Elongation	1	102	0.00714736	0.999893	0.999893	1	9	0.000662886	9606	Homo sapiens	EEF1A2		R-HSA-156909
R-HSA-983170	Antigen Presentation: Folding, assembly and peptide loading of class I MHC	1	103	0.00721743	0.999902	0.999902	1	16	0.00117846	9606	Homo sapiens	ERAP2		R-HSA-983158
R-HSA-69242	S Phase	4	180	0.012613	0.999919	0.999919	7	54	0.00397731	9606	Homo sapiens	PSMC4;ORC2;UBE2E1;CABLES1		R-HSA-75825;R-HSA-68944;R-HSA-187574;R-HSA-68948;R-HSA-69015;R-HSA-174164;R-HSA-69016
R-HSA-2029482	Regulation of actin dynamics for phagocytic cup formation	3	158	0.0110714	0.99992	0.99992	8	24	0.0017677	9606	Homo sapiens	ABI2;WIPF1;WIPF3		R-HSA-2130194;R-HSA-2197698;R-HSA-2029469;R-HSA-2029466;R-HSA-442592;R-HSA-2029465;R-HSA-2197691;R-HSA-2197690
R-HSA-72764	Eukaryotic Translation Termination	1	106	0.00742765	0.999926	0.999926	4	5	0.00036827	9606	Homo sapiens	GSPT2		R-HSA-141671;R-HSA-141691;R-HSA-141673;R-HSA-6800138
R-HSA-3371556	Cellular response to heat stress	2	135	0.00945974	0.999928	0.999928	2	29	0.00213597	9606	Homo sapiens	CAMK2B;HSPB8		R-HSA-5082356;R-HSA-5082387
R-HSA-6807878	COPI-mediated anterograde transport	1	107	0.00749772	0.999932	0.999932	6	12	0.000883848	9606	Homo sapiens	CD55		R-HSA-6807877;R-HSA-6809011;R-HSA-6807875;R-HSA-6809010;R-HSA-6809006;R-HSA-6809003
R-HSA-3108232	SUMO E3 ligases SUMOylate target proteins	4	183	0.0128232	0.999935	0.999935	7	131	0.00964867	9606	Homo sapiens	TFAP2A;HDAC4;TRIM28;MITF		R-HSA-3234081;R-HSA-3232162;R-HSA-4615987;R-HSA-4615872;R-HSA-4720446;R-HSA-4720432;R-HSA-3782535
R-HSA-9717207	Sensory perception of sweet, bitter, and umami (glutamate) taste	2	137	0.00959989	0.999939	0.999939	11	21	0.00154673	9606	Homo sapiens	GNAT3;SCN1B		R-HSA-9717396;R-HSA-9717382;R-HSA-9717206;R-HSA-9728752;R-HSA-9717202;R-HSA-9728723;R-HSA-9728748;R-HSA-9717182;R-HSA-9728697;R-HSA-9728729;R-HSA-9728747
R-HSA-194315	Signaling by Rho GTPases	36	709	0.0496812	0.999947	0.999947	74	203	0.0149518	9606	Homo sapiens	GRB7;DOCK3;HIST1H2BJ;WIPF1;WIPF3;ARHGAP1;ARHGAP18;UACA;PREX2;STK10;DOCK11;GJA1;KLC3;SH3BP1;SH3PXD2A;SLITRK3;WDR91;ARHGDIB;RHPN1;PAK7;EPSTI1;HIST1H2AD;SLITRK5;EFHD1;MYH11;EMB;HIST1H3D;PDK1;MPP7;FMNL2;ABI2;RHOJ;HIST1H2BG;EPHA2		R-HSA-5665751;R-HSA-5665748;R-HSA-2029469;R-HSA-2029466;R-HSA-5623632;R-HSA-5666129;R-HSA-9018766;R-HSA-2029465;R-HSA-9018754;R-HSA-8981637;R-HSA-9693214;R-HSA-9018758;R-HSA-9013145;R-HSA-5625797;R-HSA-5625796;R-HSA-9014296;R-HSA-9013144;R-HSA-5668932;R-HSA-9013147;R-HSA-5667008;R-HSA-9013022;R-HSA-9013009;R-HSA-9017488;R-HSA-9696266;R-HSA-2197691;R-HSA-9017491;R-HSA-2197690;R-HSA-9696271;R-HSA-9…
R-HSA-211897	Cytochrome P450 - arranged by substrate type	4	186	0.0130334	0.999948	0.999948	17	61	0.00449289	9606	Homo sapiens	CYP24A1;CYP21A2;CYP2S1;CYP7B1		R-HSA-211874;R-HSA-76416;R-HSA-76354;R-HSA-192065;R-HSA-211910;R-HSA-212005;R-HSA-212004;R-HSA-76397;R-HSA-211950;R-HSA-143468;R-HSA-193964;R-HSA-192051;R-HSA-76434;R-HSA-211991;R-HSA-211988;R-HSA-76475;R-HSA-211929
R-HSA-166786	Creation of C4 and C2 activators	1	111	0.00777801	0.999953	0.999953	2	8	0.000589232	9606	Homo sapiens	C1S		R-HSA-173626;R-HSA-173631
R-HSA-425393	Transport of inorganic cations/anions and amino acids/oligopeptides	3	165	0.0115619	0.999954	0.999954	3	75	0.00552405	9606	Homo sapiens	SLC15A2;SLC7A8;SLC15A3		R-HSA-428007;R-HSA-427998;R-HSA-352191
R-HSA-9694516	SARS-CoV-2 Infection	1	112	0.00784808	0.999957	0.999957	2	116	0.00854386	9606	Homo sapiens	ST6GAL1		R-HSA-9697018;R-HSA-9694718
R-HSA-5617833	Cilium Assembly	5	210	0.0147152	0.999958	0.999958	22	50	0.0036827	9606	Homo sapiens	IQCB1;ALB;PDE6D;SSTR3;KIF17		R-HSA-5624949;R-HSA-5624948;R-HSA-5626228;R-HSA-5624951;R-HSA-5625424;R-HSA-5626227;R-HSA-5625426;R-HSA-5624956;R-HSA-5624127;R-HSA-5638012;R-HSA-5624126;R-HSA-5626681;R-HSA-5624953;R-HSA-5624952;R-HSA-5617816;R-HSA-5638009;R-HSA-5624954;R-HSA-5625421;R-HSA-5626220;R-HSA-5626223;R-HSA-5625416;R-HSA-5626699
R-HSA-449147	Signaling by Interleukins	31	643	0.0450564	0.999963	0.999963	129	493	0.0363114	9606	Homo sapiens	LYN;DUSP4;SNAP25;ANXA1;CEBPD;CSF1;ANXA2;STAT3;FOS;TNFRSF1B;IL27RA;HCK;BCAM;TG;IRAK2;PSMC4;CASP1;PELI1;FYN;CD36;HIST1H3D;NFKBIB;RAG1		R-HSA-6785895;R-HSA-1112602;R-HSA-8987266;R-HSA-1112604;R-HSA-8985988;R-HSA-450827;R-HSA-8987014;R-HSA-8987270;R-HSA-8987033;R-HSA-450325;R-HSA-203797;R-HSA-8982163;R-HSA-8982162;R-HSA-1112587;R-HSA-8982165;R-HSA-879917;R-HSA-8950441;R-HSA-6784323;R-HSA-8952749;R-HSA-8987052;R-HSA-450337;R-HSA-8865711;R-HSA-6786124;R-HSA-450346;R-HSA-6789960;R-HSA-8937656;R-HSA-8950716;R-HSA-8987070;R-HSA-9009072…
R-HSA-2142753	Arachidonic acid metabolism	3	168	0.0117721	0.999964	0.999964	5	77	0.00567136	9606	Homo sapiens	GGT5;PLA2G4A;PTGS1		R-HSA-140355;R-HSA-140359;R-HSA-2314678;R-HSA-266046;R-HSA-111883
R-HSA-8956319	Nucleotide catabolism	2	144	0.0100904	0.999966	0.999966	4	63	0.0046402	9606	Homo sapiens	DPYD;ENTPD8		R-HSA-73585;R-HSA-73616;R-HSA-8851538;R-HSA-8851550
R-HSA-2990846	SUMOylation	4	192	0.0134539	0.999967	0.999967	7	140	0.0103116	9606	Homo sapiens	TFAP2A;HDAC4;TRIM28;MITF		R-HSA-3234081;R-HSA-3232162;R-HSA-4615987;R-HSA-4615872;R-HSA-4720446;R-HSA-4720432;R-HSA-3782535
R-HSA-376176	Signaling by ROBO receptors	6	235	0.016467	0.99997	0.99997	14	60	0.00441924	9606	Homo sapiens	PSMC4;FLRT3;LHX2;PAK7;SLIT3;GSPT2		R-HSA-9011145;R-HSA-9011083;R-HSA-9011074;R-HSA-9011077;R-HSA-9011143;R-HSA-9010523;R-HSA-9014652;R-HSA-428531;R-HSA-9010815;R-HSA-373715;R-HSA-9011313;R-HSA-9014834;R-HSA-9014610;R-HSA-9010231
R-HSA-1236975	Antigen processing-Cross presentation	4	195	0.0136641	0.999974	0.999974	6	23	0.00169404	9606	Homo sapiens	VAMP8;PSMC4;FGG;CD36		R-HSA-8863895;R-HSA-8863973;R-HSA-1236935;R-HSA-1236970;R-HSA-1236958;R-HSA-1236956
R-HSA-9716542	Signaling by Rho GTPases, Miro GTPases and RHOBTB3	36	725	0.0508023	0.999974	0.999974	74	212	0.0156146	9606	Homo sapiens	GRB7;DOCK3;HIST1H2BJ;WIPF1;WIPF3;ARHGAP1;ARHGAP18;UACA;PREX2;STK10;DOCK11;GJA1;KLC3;SH3BP1;SH3PXD2A;SLITRK3;WDR91;ARHGDIB;RHPN1;PAK7;EPSTI1;HIST1H2AD;SLITRK5;EFHD1;MYH11;EMB;HIST1H3D;PDK1;MPP7;FMNL2;ABI2;RHOJ;HIST1H2BG;EPHA2		R-HSA-5665751;R-HSA-5665748;R-HSA-2029469;R-HSA-2029466;R-HSA-5623632;R-HSA-5666129;R-HSA-9018766;R-HSA-2029465;R-HSA-9018754;R-HSA-8981637;R-HSA-9693214;R-HSA-9018758;R-HSA-9013145;R-HSA-5625797;R-HSA-5625796;R-HSA-9014296;R-HSA-9013144;R-HSA-5668932;R-HSA-9013147;R-HSA-5667008;R-HSA-9013022;R-HSA-9013009;R-HSA-9017488;R-HSA-9696266;R-HSA-2197691;R-HSA-9017491;R-HSA-2197690;R-HSA-9696271;R-HSA-9…
R-HSA-5663220	RHO GTPases Activate Formins	2	149	0.0104408	0.999978	0.999978	6	27	0.00198866	9606	Homo sapiens	FMNL2;EMB		R-HSA-5665751;R-HSA-5665748;R-HSA-5666160;R-HSA-5666129;R-HSA-5665727;R-HSA-5666169
R-HSA-9662851	Anti-inflammatory response favouring Leishmania parasite infection	9	297	0.0208114	0.999978	0.999978	9	40	0.00294616	9606	Homo sapiens	LYN;GGT5;HCK;GNAZ;GNAT3;GNG4;FYN;ADCY2;TSHR		R-HSA-9664275;R-HSA-9660819;R-HSA-163617;R-HSA-392129;R-HSA-9664261;R-HSA-266046;R-HSA-111930;R-HSA-9660824;R-HSA-9660828
R-HSA-9664433	Leishmania parasite growth and survival	9	297	0.0208114	0.999978	0.999978	9	40	0.00294616	9606	Homo sapiens	LYN;GGT5;HCK;GNAZ;GNAT3;GNG4;FYN;ADCY2;TSHR		R-HSA-9664275;R-HSA-9660819;R-HSA-163617;R-HSA-392129;R-HSA-9664261;R-HSA-266046;R-HSA-111930;R-HSA-9660824;R-HSA-9660828
R-HSA-948021	Transport to the Golgi and subsequent modification	5	219	0.0153458	0.999978	0.999978	20	60	0.00441924	9606	Homo sapiens	ST6GAL1;FUCA1;CTSZ;CD55;KCTD15		R-HSA-6807877;R-HSA-5694418;R-HSA-6807875;R-HSA-203973;R-HSA-5694417;R-HSA-5694527;R-HSA-6809006;R-HSA-5694428;R-HSA-204008;R-HSA-5694522;R-HSA-6809003;R-HSA-975902;R-HSA-5694439;R-HSA-6809011;R-HSA-6786034;R-HSA-6809010;R-HSA-5694446;R-HSA-5693807;R-HSA-5694441;R-HSA-5694409
R-HSA-1632852	Macroautophagy	2	150	0.0105108	0.999979	0.999979	10	87	0.0064079	9606	Homo sapiens	EPAS1;PRKAG2		R-HSA-1632857;R-HSA-5679239;R-HSA-5679205;R-HSA-9664871;R-HSA-9613530;R-HSA-5675868;R-HSA-5665868;R-HSA-5672011;R-HSA-5672008;R-HSA-5673768
R-HSA-211945	Phase I - Functionalization of compounds	9	299	0.0209516	0.99998	0.99998	23	98	0.00721809	9606	Homo sapiens	CYP24A1;CYP21A2;CYP2S1;ALDH1A1;ACSS1;CYP7B1;CES3;PTGS1		R-HSA-211874;R-HSA-76416;R-HSA-140355;R-HSA-76354;R-HSA-192065;R-HSA-211910;R-HSA-140359;R-HSA-212005;R-HSA-212004;R-HSA-8937442;R-HSA-71691;R-HSA-76397;R-HSA-211950;R-HSA-5693691;R-HSA-143468;R-HSA-193964;R-HSA-449911;R-HSA-192051;R-HSA-76434;R-HSA-211991;R-HSA-211988;R-HSA-76475;R-HSA-211929
R-HSA-9648025	EML4 and NUDC in mitotic spindle formation	1	121	0.00847873	0.999981	0.999981	1	5	0.00036827	9606	Homo sapiens	EMB		R-HSA-9648114
R-HSA-983169	Class I MHC mediated antigen processing & presentation	19	474	0.0332142	0.999984	0.999984	13	48	0.00353539	9606	Homo sapiens	UBE2H;ERAP2;FBXO2;FGG;UBE2E1;UBE2E2;RNF6;KLHL41;KLHL20;HERC5;VAMP8;FBXO40;PSMC4;ASB9;RNF182;CD36;LONRF1;SPSB4		R-HSA-983150;R-HSA-8863973;R-HSA-983147;R-HSA-983140;R-HSA-1236958;R-HSA-1236956;R-HSA-8863895;R-HSA-1236935;R-HSA-1236970;R-HSA-983158;R-HSA-983157;R-HSA-983156;R-HSA-983152
R-HSA-6803157	Antimicrobial peptides	1	123	0.00861888	0.999984	0.999984	1	58	0.00427193	9606	Homo sapiens	CLU		R-HSA-6810643
R-HSA-5628897	TP53 Regulates Metabolic Genes	1	126	0.00882909	0.999988	0.999988	2	34	0.00250424	9606	Homo sapiens	PRKAG2		R-HSA-5631941;R-HSA-380927
R-HSA-9010553	Regulation of expression of SLITs and ROBOs	3	183	0.0128232	0.999989	0.999989	9	20	0.00147308	9606	Homo sapiens	LHX2;PSMC4;GSPT2		R-HSA-9011145;R-HSA-9010523;R-HSA-9011083;R-HSA-9014652;R-HSA-9011313;R-HSA-9014610;R-HSA-9011074;R-HSA-9011077;R-HSA-9011143
R-HSA-5688426	Deubiquitination	8	289	0.0202509	0.999989	0.999989	11	77	0.00567136	9606	Homo sapiens	HIST1H2BJ;PSMC4;TNIP3;USP2;HIST1H2AD;HIST1H2BG		R-HSA-5690790;R-HSA-5689972;R-HSA-5691381;R-HSA-5689539;R-HSA-5691411;R-HSA-5696960;R-HSA-5690080;R-HSA-5665854;R-HSA-5665871;R-HSA-5690845;R-HSA-5690157
R-HSA-9609646	HCMV Infection	7	270	0.0189195	0.99999	0.99999	8	31	0.00228327	9606	Homo sapiens	CEBPD;TRIM28;HIST1H2BJ;HIST1H2AD;HIST1H2BG;HIST1H3D		R-HSA-9614816;R-HSA-9621073;R-HSA-9698928;R-HSA-9624033;R-HSA-9614810;R-HSA-9614811;R-HSA-9623096;R-HSA-9698926
R-HSA-1592230	Mitochondrial biogenesis	1	128	0.00896924	0.99999	0.99999	1	36	0.00265154	9606	Homo sapiens	PRKAG2		R-HSA-1592244
R-HSA-72163	mRNA Splicing - Major Pathway	3	185	0.0129634	0.999991	0.999991	8	9	0.000662886	9606	Homo sapiens	SNRPG;SNRPGP15;PPIL3;LSM3		R-HSA-72160;R-HSA-72130;R-HSA-156661;R-HSA-72139;R-HSA-72107;R-HSA-72124;R-HSA-72143;R-HSA-72127
R-HSA-199977	ER to Golgi Anterograde Transport	2	164	0.0114918	0.999994	0.999994	17	39	0.0028725	9606	Homo sapiens	CTSZ;CD55		R-HSA-6807877;R-HSA-5694418;R-HSA-6807875;R-HSA-203973;R-HSA-5694417;R-HSA-5694527;R-HSA-6809006;R-HSA-5694428;R-HSA-204008;R-HSA-5694522;R-HSA-6809003;R-HSA-5694439;R-HSA-6809011;R-HSA-6809010;R-HSA-5694446;R-HSA-5694441;R-HSA-5694409
R-HSA-162599	Late Phase of HIV Life Cycle	2	164	0.0114918	0.999994	0.999994	32	78	0.00574501	9606	Homo sapiens	EMB;SUPT5H		R-HSA-180739;R-HSA-167181;R-HSA-170706;R-HSA-170704;R-HSA-167191;R-HSA-180885;R-HSA-167192;R-HSA-167196;R-HSA-167197;R-HSA-167459;R-HSA-165028;R-HSA-167076;R-HSA-167077;R-HSA-165034;R-HSA-167147;R-HSA-167083;R-HSA-167150;R-HSA-167087;R-HSA-167148;R-HSA-167084;R-HSA-167085;R-HSA-167090;R-HSA-167282;R-HSA-165043;R-HSA-167153;R-HSA-167478;R-HSA-165047;R-HSA-167284;R-HSA-167288;R-HSA-167481;R-HSA-165…
R-HSA-2500257	Resolution of Sister Chromatid Cohesion	1	134	0.00938967	0.999994	0.999994	4	8	0.000589232	9606	Homo sapiens	EMB		R-HSA-2484822;R-HSA-1638803;R-HSA-2468287;R-HSA-1638821
R-HSA-9635486	Infection with Mycobacterium tuberculosis	1	135	0.00945974	0.999995	0.999995	1	73	0.00537674	9606	Homo sapiens	RAB5A		R-HSA-9636684
R-HSA-9612973	Autophagy	2	166	0.011632	0.999995	0.999995	10	108	0.00795463	9606	Homo sapiens	EPAS1;PRKAG2		R-HSA-1632857;R-HSA-5679239;R-HSA-5679205;R-HSA-9664871;R-HSA-9613530;R-HSA-5675868;R-HSA-5665868;R-HSA-5672011;R-HSA-5672008;R-HSA-5673768
R-HSA-69620	Cell Cycle Checkpoints	7	280	0.0196202	0.999995	0.999995	12	56	0.00412462	9606	Homo sapiens	HIST1H2BJ;PSMC4;ORC2;UBE2E1;HIST1H2BG;EMB		R-HSA-5683735;R-HSA-69600;R-HSA-69891;R-HSA-141409;R-HSA-8852354;R-HSA-141431;R-HSA-176298;R-HSA-141422;R-HSA-176318;R-HSA-141423;R-HSA-141439;R-HSA-264458
R-HSA-2467813	Separation of Sister Chromatids	3	195	0.0136641	0.999996	0.999996	5	8	0.000589232	9606	Homo sapiens	PSMC4;UBE2E1;EMB		R-HSA-174144;R-HSA-2467809;R-HSA-2467811;R-HSA-174202;R-HSA-174121
R-HSA-8978868	Fatty acid metabolism	15	431	0.0302011	0.999996	0.999996	22	217	0.0159829	9606	Homo sapiens	GGT5;ELOVL2;HSD17B3;PRKAG2;PLA2G4A;ELOVL6;ACSL4;CROT;PTPLA;PTGS1;ACOX2;ACOT2;ACSBG1		R-HSA-140355;R-HSA-5695957;R-HSA-548843;R-HSA-200423;R-HSA-5690066;R-HSA-389889;R-HSA-140359;R-HSA-548814;R-HSA-548800;R-HSA-111883;R-HSA-2046100;R-HSA-5676637;R-HSA-390281;R-HSA-5690043;R-HSA-2046095;R-HSA-2046094;R-HSA-2314678;R-HSA-2046090;R-HSA-2046088;R-HSA-266046;R-HSA-548818;R-HSA-2046083
R-HSA-72172	mRNA Splicing	3	196	0.0137341	0.999996	0.999996	13	14	0.00103116	9606	Homo sapiens	SNRPG;SNRPGP15;PPIL3;LSM3		R-HSA-72160;R-HSA-72130;R-HSA-75079;R-HSA-75081;R-HSA-75080;R-HSA-72139;R-HSA-72107;R-HSA-75083;R-HSA-75082;R-HSA-72143;R-HSA-156661;R-HSA-72124;R-HSA-72127
R-HSA-162906	HIV Infection	6	264	0.0184991	0.999996	0.999996	39	160	0.0117846	9606	Homo sapiens	HCK;PSMC4;FYN;AP1S3;EMB;SUPT5H		R-HSA-180739;R-HSA-182279;R-HSA-182286;R-HSA-167181;R-HSA-200908;R-HSA-170706;R-HSA-170704;R-HSA-167191;R-HSA-180885;R-HSA-200858;R-HSA-167192;R-HSA-167196;R-HSA-167197;R-HSA-180573;R-HSA-167459;R-HSA-165028;R-HSA-167076;R-HSA-167077;R-HSA-165034;R-HSA-167147;R-HSA-167083;R-HSA-167150;R-HSA-167087;R-HSA-167148;R-HSA-167084;R-HSA-167085;R-HSA-167090;R-HSA-167282;R-HSA-165043;R-HSA-167153;R-HSA-167…
R-HSA-3700989	Transcriptional Regulation by TP53	18	487	0.0341251	0.999997	0.999997	29	259	0.0190764	9606	Homo sapiens	CPNE9;USP2;PRKAG2;TNFRSF10B;FOS;SUPT5H;ING5;PLAGL1;TP53INP1;CASP1;PIP4K2A;SMYD3;PDK1		R-HSA-6797606;R-HSA-6803946;R-HSA-5631941;R-HSA-6805620;R-HSA-5633414;R-HSA-6799409;R-HSA-6797616;R-HSA-6806394;R-HSA-6799418;R-HSA-6799416;R-HSA-6805638;R-HSA-3215251;R-HSA-5689972;R-HSA-6811522;R-HSA-6798082;R-HSA-6798081;R-HSA-6806412;R-HSA-3222237;R-HSA-6805640;R-HSA-5633441;R-HSA-6805650;R-HSA-6795473;R-HSA-6797712;R-HSA-6803935;R-HSA-6805470;R-HSA-6805022;R-HSA-380927;R-HSA-8877692;R-HSA-88…
R-HSA-71387	Metabolism of carbohydrates	16	456	0.0319529	0.999997	0.999997	52	243	0.0178979	9606	Homo sapiens	CSGALNACT1;HS3ST3B1;CHST9;SDC2;BGN;HS3ST1;GAL;B3GNT7;PPP1R3C;ALDH1A1;CHST1;CSPG4;NHLRC1;GPC4;CHST3		R-HSA-1971487;R-HSA-1793176;R-HSA-1971482;R-HSA-1971483;R-HSA-2024084;R-HSA-2022919;R-HSA-3781024;R-HSA-2076419;R-HSA-1889981;R-HSA-9638064;R-HSA-3781018;R-HSA-1667005;R-HSA-3781021;R-HSA-1889978;R-HSA-3781023;R-HSA-3781009;R-HSA-3781011;R-HSA-2022065;R-HSA-9632034;R-HSA-3781001;R-HSA-2022063;R-HSA-2024108;R-HSA-2022061;R-HSA-9632033;R-HSA-2022056;R-HSA-2024100;R-HSA-2022052;R-HSA-3780995;R-HSA-3…
R-HSA-9658195	Leishmania infection	13	406	0.0284493	0.999998	0.999998	21	95	0.00699713	9606	Homo sapiens	LYN;GGT5;GNAZ;WIPF1;WIPF3;ADCY2;TSHR;HCK;ABI2;GNG4;GNAT3;CASP1;FYN		R-HSA-9664275;R-HSA-448678;R-HSA-9660819;R-HSA-163617;R-HSA-2197698;R-HSA-2029469;R-HSA-392129;R-HSA-2029466;R-HSA-442592;R-HSA-2029465;R-HSA-844612;R-HSA-9660824;R-HSA-9660828;R-HSA-2130194;R-HSA-9664261;R-HSA-448702;R-HSA-448703;R-HSA-2197691;R-HSA-266046;R-HSA-111930;R-HSA-2197690
R-HSA-162587	HIV Life Cycle	2	179	0.0125429	0.999998	0.999998	32	117	0.00861751	9606	Homo sapiens	EMB;SUPT5H		R-HSA-180739;R-HSA-167181;R-HSA-170706;R-HSA-170704;R-HSA-167191;R-HSA-180885;R-HSA-167192;R-HSA-167196;R-HSA-167197;R-HSA-167459;R-HSA-165028;R-HSA-167076;R-HSA-167077;R-HSA-165034;R-HSA-167147;R-HSA-167083;R-HSA-167150;R-HSA-167087;R-HSA-167148;R-HSA-167084;R-HSA-167085;R-HSA-167090;R-HSA-167282;R-HSA-165043;R-HSA-167153;R-HSA-167478;R-HSA-165047;R-HSA-167284;R-HSA-167288;R-HSA-167481;R-HSA-165…
R-HSA-198933	Immunoregulatory interactions between a Lymphoid and a non-Lymphoid cell	8	316	0.0221428	0.999998	0.999998	7	44	0.00324077	9606	Homo sapiens	COL3A1;COL2A1;KLRD1;CD1D;CD33;OSCAR;MPZL2		R-HSA-8850326;R-HSA-5685607;R-HSA-5696356;R-HSA-5696357;R-HSA-8850356;R-HSA-199062;R-HSA-199093
R-HSA-15869	Metabolism of nucleotides	5	256	0.0179385	0.999999	0.999999	9	141	0.0103852	9606	Homo sapiens	DPYD;ENTPD8;CTPS2;GLRX;AMPD2		R-HSA-73585;R-HSA-73616;R-HSA-504054;R-HSA-8866405;R-HSA-111746;R-HSA-8851538;R-HSA-8851550;R-HSA-111742;R-HSA-76590
R-HSA-69275	G2/M Transition	3	212	0.0148553	0.999999	0.999999	5	78	0.00574501	9606	Homo sapiens	FKBPL;PSMC4;EMB		R-HSA-8854071;R-HSA-8852354;R-HSA-170072;R-HSA-8854044;R-HSA-8852362
R-HSA-453274	Mitotic G2-G2/M phases	3	214	0.0149954	0.999999	0.999999	5	80	0.00589232	9606	Homo sapiens	FKBPL;PSMC4;EMB		R-HSA-8854071;R-HSA-8852354;R-HSA-170072;R-HSA-8854044;R-HSA-8852362
R-HSA-1280218	Adaptive Immune System	50	1005	0.0704225	0.999999	0.999999	93	264	0.0194446	9606	Homo sapiens	RNF6;CD1D;FYB;HERC5;FBXO40;CD79A;CTSO;KLC3;CTSH;FYN;TNFRSF14;CD36;AP1S3;LONRF1;CD33;CTSB;PDK1;MPZL2;LYN;BTNL9;UBE2H;ERAP2;FBXO2;FGG;UBE2E1;UBE2E2;NFATC2;NFATC1;DNM1;KLHL41;KLHL20;OSCAR;VAMP8;DNM3;COL3A1;COL2A1;PSMC4;ASB9;RNF182;KLRD1;PRKCQ;TRIB1;CARD11;RAPGEF3;NFKBIB;SPSB4		R-HSA-389381;R-HSA-9606162;R-HSA-9606163;R-HSA-2025882;R-HSA-2130725;R-HSA-392834;R-HSA-202500;R-HSA-8851979;R-HSA-2130349;R-HSA-202510;R-HSA-939265;R-HSA-8863895;R-HSA-1168641;R-HSA-8850326;R-HSA-1168640;R-HSA-983709;R-HSA-1168643;R-HSA-1168642;R-HSA-983707;R-HSA-1168644;R-HSA-199062;R-HSA-9606151;R-HSA-389523;R-HSA-5690702;R-HSA-983703;R-HSA-202394;R-HSA-389919;R-HSA-2130619;R-HSA-983700;R-HSA-…
R-HSA-1280215	Cytokine Signaling in Immune system	56	1092	0.0765188	0.999999	0.999999	193	708	0.052147	9606	Homo sapiens	CAMK2B;SNAP25;CEBPD;CSF1;IFIT3;IL27RA;HERC5;IRAK2;CASP1;GRB10;FYN;TNFRSF14;CD36;GBP2;ZNF225;GBP1;GBP4;HIST1H3D;GBP3;RAG1;LYN;DUSP4;EGR1;ANXA1;ANXA2;STAT3;UBE2E1;ISG15;FOS;TNFRSF1B;HCK;BCAM;TG;PSMC4;IRF1;TNFSF4;PELI1;IRF6;NFKBIB		R-HSA-936462;R-HSA-1112602;R-HSA-8987266;R-HSA-1112604;R-HSA-8987270;R-HSA-203797;R-HSA-5668417;R-HSA-9605259;R-HSA-8982163;R-HSA-8982162;R-HSA-1112587;R-HSA-8982165;R-HSA-8950441;R-HSA-5668467;R-HSA-1031716;R-HSA-6786124;R-HSA-1031713;R-HSA-8937656;R-HSA-5668454;R-HSA-8937654;R-HSA-6786095;R-HSA-6786097;R-HSA-8950480;R-HSA-1168456;R-HSA-9630923;R-HSA-1168459;R-HSA-449117;R-HSA-8950485;R-HSA-6784…
R-HSA-9709957	Sensory Perception	17	493	0.0345456	0.999999	0.999999	27	139	0.0102379	9606	Homo sapiens	SNAP25;SDC2;AKR1C1;LPL;CACNA2D2;CABP1;SYP;LRP8;GNAL;GNAT3;SCNN1A;PRKCQ;GPC4;OR7C1;SCN1B;STRA6		R-HSA-9717396;R-HSA-2453863;R-HSA-9717206;R-HSA-9662096;R-HSA-9712208;R-HSA-9717202;R-HSA-9712210;R-HSA-2404131;R-HSA-9728723;R-HSA-2423785;R-HSA-9728729;R-HSA-2453876;R-HSA-9717382;R-HSA-2395768;R-HSA-9712201;R-HSA-9712183;R-HSA-9728752;R-HSA-2672334;R-HSA-9659515;R-HSA-9717182;R-HSA-9728697;R-HSA-2429643;R-HSA-9712187;R-HSA-74615;R-HSA-9728748;R-HSA-9728747;R-HSA-2855252
R-HSA-6791226	Major pathway of rRNA processing in the nucleolus and cytosol	2	189	0.0132436	0.999999	0.999999	2	7	0.000515578	9606	Homo sapiens	TEX10;WDR12		R-HSA-6791219;R-HSA-6791218
R-HSA-6811442	Intra-Golgi and retrograde Golgi-to-ER traffic	3	219	0.0153458	0.999999	0.999999	3	48	0.00353539	9606	Homo sapiens	KLC3;PLA2G4A		R-HSA-8848484;R-HSA-6811426;R-HSA-6811423
R-HSA-500792	GPCR ligand binding	23	606	0.0424637	1	1	23	187	0.0137733	9606	Homo sapiens	CD97;GPR37;ANXA1;PTCH1;PTGER3;F2R;LPAR1;ECE1;GPR37L1;GRPR;SSTR3;TSHR;EDNRA;GAL;GNG4;F2RL1;ACKR3;PRLHR;S1PR3;S1PR5;CD55;PROK1;LPPR1		R-HSA-9731924;R-HSA-419428;R-HSA-445124;R-HSA-374758;R-HSA-374214;R-HSA-8876868;R-HSA-444773;R-HSA-5336182;R-HSA-389026;R-HSA-5336184;R-HSA-381612;R-HSA-391375;R-HSA-391913;R-HSA-388855;R-HSA-389463;R-HSA-444691;R-HSA-388560;R-HSA-879674;R-HSA-391933;R-HSA-6797630;R-HSA-444476;R-HSA-419389;R-HSA-375384
R-HSA-196854	Metabolism of vitamins and cofactors	10	379	0.0265574	1	1	11	206	0.0151727	9606	Homo sapiens	CARKD;NOS3;TTPA;AKR1C1;SDC2;ENPP2;LPL;GPC4;LRP8		R-HSA-6806967;R-HSA-1497796;R-HSA-8938314;R-HSA-8874705;R-HSA-2404131;R-HSA-8874718;R-HSA-2395768;R-HSA-2423785;R-HSA-2429643;R-HSA-1497784;R-HSA-2855252
R-HSA-168255	Influenza Infection	2	200	0.0140144	1	1	3	59	0.00434558	9606	Homo sapiens	ISG15;EMB		R-HSA-168880;R-HSA-1176059;R-HSA-168857
R-HSA-8868773	rRNA processing in the nucleus and cytosol	2	207	0.0145049	1	1	2	15	0.00110481	9606	Homo sapiens	TEX10;WDR12		R-HSA-6791219;R-HSA-6791218
R-HSA-372790	Signaling by GPCR	38	865	0.0606124	1	1	111	355	0.0261472	9606	Homo sapiens	CAMK2B;GNAZ;DAGLA;PDE1B;RGS16;PDE3B;PTGER3;LPAR1;ADCY2;ECE1;GRPR;RGS5;EDNRA;GRK5;GNG4;GNAT3;PRLHR;S1PR3;S1PR5;CD55;PROK1;PDK1;CD97;GPR37;ANXA1;PTCH1;F2R;PLA2G4A;GPR37L1;SSTR3;TSHR;GNAL;GAL;F2RL1;ACKR3;PRKCQ;DGKI;LPPR1		R-HSA-426240;R-HSA-167429;R-HSA-111881;R-HSA-111883;R-HSA-392206;R-HSA-167433;R-HSA-8981892;R-HSA-392212;R-HSA-444691;R-HSA-420883;R-HSA-8964241;R-HSA-8964242;R-HSA-111898;R-HSA-163617;R-HSA-8982703;R-HSA-5336182;R-HSA-8964271;R-HSA-5336184;R-HSA-426032;R-HSA-879674;R-HSA-444476;R-HSA-111930;R-HSA-419389;R-HSA-8982709;R-HSA-9617583;R-HSA-111955;R-HSA-389463;R-HSA-111956;R-HSA-8964317;R-HSA-679763…
R-HSA-425407	SLC-mediated transmembrane transport	11	416	0.02915	1	1	14	191	0.0140679	9606	Homo sapiens	SLC14A1;SLC15A2;SLC47A1;SLCO3A1;SLC7A8;SLC39A8;EMB;SLC29A1;SLC15A3;SLC6A1;RUNX1		R-HSA-444007;R-HSA-109536;R-HSA-428007;R-HSA-433698;R-HSA-879584;R-HSA-549241;R-HSA-442387;R-HSA-109527;R-HSA-427998;R-HSA-109529;R-HSA-444126;R-HSA-352191;R-HSA-434650;R-HSA-109534
R-HSA-72306	tRNA processing	1	182	0.0127531	1	1	1	54	0.00397731	9606	Homo sapiens	TSEN2		R-HSA-5696813
R-HSA-388396	GPCR downstream signalling	32	786	0.0550767	1	1	88	168	0.0123739	9606	Homo sapiens	CAMK2B;GNAZ;DAGLA;PDE1B;RGS16;PDE3B;PTGER3;LPAR1;ADCY2;GRPR;RGS5;EDNRA;GRK5;GNG4;GNAT3;S1PR3;S1PR5;PROK1;PDK1;GPR37;ANXA1;F2R;PLA2G4A;GPR37L1;SSTR3;TSHR;GNAL;GAL;F2RL1;ACKR3;PRKCQ;DGKI		R-HSA-8982025;R-HSA-749448;R-HSA-425861;R-HSA-8982026;R-HSA-392064;R-HSA-749454;R-HSA-426240;R-HSA-749453;R-HSA-749452;R-HSA-750988;R-HSA-167429;R-HSA-111881;R-HSA-8982017;R-HSA-111883;R-HSA-8982019;R-HSA-392206;R-HSA-167433;R-HSA-8982018;R-HSA-8982021;R-HSA-8982020;R-HSA-749446;R-HSA-8981892;R-HSA-8964614;R-HSA-112271;R-HSA-392212;R-HSA-751001;R-HSA-8964634;R-HSA-420883;R-HSA-8964241;R-HSA-89642…
R-HSA-68882	Mitotic Anaphase	3	249	0.017448	1	1	5	32	0.00235693	9606	Homo sapiens	PSMC4;UBE2E1;EMB		R-HSA-174144;R-HSA-2467809;R-HSA-2467811;R-HSA-174202;R-HSA-174121
R-HSA-2555396	Mitotic Metaphase and Anaphase	3	250	0.017518	1	1	5	33	0.00243058	9606	Homo sapiens	PSMC4;UBE2E1;EMB		R-HSA-174144;R-HSA-2467809;R-HSA-2467811;R-HSA-174202;R-HSA-174121
R-HSA-5619115	Disorders of transmembrane transporters	4	278	0.0194801	1	1	6	87	0.0064079	9606	Homo sapiens	PSMC4;ABCB4;DERL3;ABCC9		R-HSA-8866854;R-HSA-5678418;R-HSA-5678749;R-HSA-8866858;R-HSA-8866857;R-HSA-8866856
R-HSA-72203	Processing of Capped Intron-Containing Pre-mRNA	3	256	0.0179385	1	1	13	32	0.00235693	9606	Homo sapiens	SNRPG;SNRPGP15;PPIL3;LSM3		R-HSA-72160;R-HSA-72130;R-HSA-75079;R-HSA-75081;R-HSA-75080;R-HSA-72139;R-HSA-72107;R-HSA-75083;R-HSA-75082;R-HSA-72143;R-HSA-156661;R-HSA-72124;R-HSA-72127
R-HSA-212436	Generic Transcription Pathway	82	1555	0.108962	1	1	231	830	0.0611328	9606	Homo sapiens	CPNE9;SERPINE1;PRKAG2;ZNF45;ING5;CTSO;TRIM28;ZNF649;HEY2;MYB;CASP1;PIP4K2A;HIST1H2AD;ZNF248;ZNF446;ZNF324;PDK1;ZNF320;USP2;UBE2E1;KCTD1;FOS;PAX5;RUNX1;ZNF718;HAND2;PRKCQ;ITGA5;HIST1H2BG;ZNF676;ZNF114;KCTD15;ZNF234;HDAC4;CAMK2B;ZNF595;HIST1H2BJ;DLX6;NOTCH4;LEF1;DLL1;HDAC9;GRIN2A;MED30;PLAGL1;ZNF626;TP53INP1;SPP1;ZNF547;HIVEP3;SMYD3;ZNF225;HIST1H3D;TFAP2A;ZNF660;ZNF141;ZNF382;TNFRSF10B;NFATC2;SUPT5…		R-HSA-8936584;R-HSA-8937097;R-HSA-8938121;R-HSA-8931981;R-HSA-8864395;R-HSA-8951428;R-HSA-8936068;R-HSA-8877192;R-HSA-8956568;R-HSA-8937113;R-HSA-6805620;R-HSA-8937118;R-HSA-8951442;R-HSA-8864412;R-HSA-8951443;R-HSA-8939667;R-HSA-8939670;R-HSA-8936599;R-HSA-8936616;R-HSA-8869543;R-HSA-8869542;R-HSA-8956586;R-HSA-5689972;R-HSA-8936621;R-HSA-8938158;R-HSA-8937134;R-HSA-8936608;R-HSA-8864431;R-HSA-8…
R-HSA-156580	Phase II - Conjugation of compounds	3	263	0.018429	1	1	7	72	0.00530309	9606	Homo sapiens	GGT5;GGT6;SULT2A1		R-HSA-176631;R-HSA-8943279;R-HSA-176474;R-HSA-176664;R-HSA-176585;R-HSA-176604;R-HSA-176588
R-HSA-1852241	Organelle biogenesis and maintenance	6	338	0.0236844	1	1	23	86	0.00633424	9606	Homo sapiens	IQCB1;ALB;PDE6D;PRKAG2;SSTR3;KIF17		R-HSA-5624949;R-HSA-5624948;R-HSA-5626228;R-HSA-5624951;R-HSA-5625424;R-HSA-5626227;R-HSA-5625426;R-HSA-5624956;R-HSA-5624127;R-HSA-5638012;R-HSA-5624126;R-HSA-1592244;R-HSA-5626681;R-HSA-5624953;R-HSA-5624952;R-HSA-5617816;R-HSA-5638009;R-HSA-5624954;R-HSA-5625421;R-HSA-5626220;R-HSA-5626223;R-HSA-5625416;R-HSA-5626699
R-HSA-72312	rRNA processing	2	245	0.0171677	1	1	2	21	0.00154673	9606	Homo sapiens	TEX10;WDR12		R-HSA-6791219;R-HSA-6791218
R-HSA-68877	Mitotic Prometaphase	1	211	0.0147852	1	1	6	20	0.00147308	9606	Homo sapiens	EMB		R-HSA-9648114;R-HSA-2484822;R-HSA-375302;R-HSA-1638803;R-HSA-2468287;R-HSA-1638821
R-HSA-382551	Transport of small molecules	40	961	0.0673394	1	1	54	443	0.0326287	9606	Homo sapiens	CAMK2B;SCARB1;SLC47A1;ABCB4;DERL3;LPL;ADCY2;SLC6A1;PCSK6;RYR3;GNG4;NIPAL2;LIPG;LRRC8C;SLC39A8;EMB;SLC15A3;SLC14A1;SLC15A2;TRPV2;CYBRD1;ATP2B3;TRPV3;ABCC9;MCOLN2;RUNX1;ANO1;SLC7A8;SLCO3A1;TFR2;PSMC4;SCNN1A;ALB;AQP11;SLC29A1;ATP6V0C;CES3;MBTPS2		R-HSA-427910;R-HSA-418309;R-HSA-6784620;R-HSA-8980228;R-HSA-6784628;R-HSA-442387;R-HSA-164377;R-HSA-163617;R-HSA-9659568;R-HSA-917805;R-HSA-433698;R-HSA-5678706;R-HSA-174757;R-HSA-422320;R-HSA-352191;R-HSA-432188;R-HSA-6784861;R-HSA-349637;R-HSA-349638;R-HSA-6784676;R-HSA-2682349;R-HSA-432195;R-HSA-2855020;R-HSA-2684901;R-HSA-8857928;R-HSA-1454916;R-HSA-5336453;R-HSA-109527;R-HSA-1467457;R-HSA-42…
R-HSA-446203	Asparagine N-linked glycosylation	9	421	0.0295004	1	1	26	144	0.0106062	9606	Homo sapiens	ST6GAL1;GAL;ST8SIA1;FUCA1;CTSZ;ST8SIA4;MLEC;CD55;KCTD15		R-HSA-901006;R-HSA-5694418;R-HSA-203973;R-HSA-5694417;R-HSA-6809006;R-HSA-5694428;R-HSA-4084978;R-HSA-6809003;R-HSA-975902;R-HSA-6809011;R-HSA-6786034;R-HSA-6809010;R-HSA-4085033;R-HSA-5694409;R-HSA-6807877;R-HSA-6807875;R-HSA-5694527;R-HSA-204008;R-HSA-5694522;R-HSA-5694439;R-HSA-532667;R-HSA-5694446;R-HSA-5693807;R-HSA-4084999;R-HSA-9638120;R-HSA-5694441
R-HSA-73894	DNA Repair	7	380	0.0266274	1	1	58	337	0.0248214	9606	Homo sapiens	C19orf40;HIST1H2BJ;EYA2;HIST1H2AD;ISG15;HIST1H2BG		R-HSA-6785126;R-HSA-69891;R-HSA-5684052;R-HSA-5683930;R-HSA-6786155;R-HSA-5683801;R-HSA-6786166;R-HSA-5682629;R-HSA-9629195;R-HSA-5683405;R-HSA-6786171;R-HSA-6785607;R-HSA-5686900;R-HSA-6785732;R-HSA-6785986;R-HSA-5693566;R-HSA-5683967;R-HSA-5683964;R-HSA-9629497;R-HSA-5653754;R-HSA-9629372;R-HSA-9629373;R-HSA-5684071;R-HSA-9629216;R-HSA-5693536;R-HSA-6785361;R-HSA-5683425;R-HSA-5693551;R-HSA-962…
R-HSA-9679506	SARS-CoV Infections	1	217	0.0152057	1	1	3	256	0.0188554	9606	Homo sapiens	ST6GAL1		R-HSA-9697018;R-HSA-9683769;R-HSA-9694718
R-HSA-8953897	Cellular responses to stimuli	40	970	0.06797	1	1	94	412	0.0303454	9606	Homo sapiens	CAMK2B;HIST1H2BJ;EPAS1;HSPB8;CABP1;NPAS2;CSRP1;CHL1;CREB3L1;GRB10;HIST1H2AD;EMB;HIST1H3D;HIST1H1C;EGLN3;GPX3;STAT3;UBE2E1;FOS;PSMC4;JMJD7-PLA2G4B;ALB;MAFK;HIST1H2BG;ATF5;TRIB1;ATP6V0C;MBTPS2;ATF3;MT1E		R-HSA-3790137;R-HSA-1791131;R-HSA-5660503;R-HSA-3790130;R-HSA-8932355;R-HSA-3788725;R-HSA-3788724;R-HSA-9645598;R-HSA-3229089;R-HSA-9640195;R-HSA-1234179;R-HSA-3223200;R-HSA-1234177;R-HSA-9708423;R-HSA-450325;R-HSA-1234183;R-HSA-9653894;R-HSA-1368065;R-HSA-9653893;R-HSA-1791116;R-HSA-1234181;R-HSA-9707523;R-HSA-9646468;R-HSA-3788705;R-HSA-9708557;R-HSA-9708430;R-HSA-9654792;R-HSA-3788708;R-HSA-32…
R-HSA-196849	Metabolism of water-soluble vitamins and cofactors	2	256	0.0179385	1	1	2	144	0.0106062	9606	Homo sapiens	CARKD;ENPP2		R-HSA-6806967;R-HSA-8938314
R-HSA-68886	M Phase	8	416	0.02915	1	1	19	91	0.00670251	9606	Homo sapiens	HIST1H2BJ;PSMC4;UBE2E1;HIST1H2AD;HIST1H2BG;EMB;HIST1H3D		R-HSA-2245218;R-HSA-9648114;R-HSA-174144;R-HSA-375302;R-HSA-2288097;R-HSA-2467809;R-HSA-2467811;R-HSA-2172678;R-HSA-1638803;R-HSA-2294600;R-HSA-174121;R-HSA-2294574;R-HSA-2484822;R-HSA-2301205;R-HSA-2294580;R-HSA-174202;R-HSA-2468287;R-HSA-1638821;R-HSA-2294590
R-HSA-168249	Innate Immune System	62	1334	0.0934763	1	1	163	710	0.0522943	9606	Homo sapiens	SNAP25;FRMPD3;CLEC4M;WIPF1;CTSZ;WIPF3;HP;CLU;HERC5;ADAMTS4;STK10;CTSO;GLIPR1;CASP4;CASP1;CTSH;CD36;CD33;PDK1;CTSB;CD97;DUSP4;MME;ANXA2;FGG;FOS;TNFRSF1B;ATAD3B;DNM1;OSCAR;VAMP8;DNM3;HCK;BCAM;GAL;CRISPLD2;PELI1;PADI2;PRKCQ;ATP6V0C;CARD11;C1S;NLRC3;C2;C7;IRAK2;NLRP4;CREG1;MLEC;FYN;CD55;LYN;NOS3;FUCA1;NFATC2;ISG15;NFATC1;NFASC;ABI2;PSMC4;KLRD1;NFKBIB		R-HSA-936462;R-HSA-8858500;R-HSA-975115;R-HSA-975879;R-HSA-975111;R-HSA-2395439;R-HSA-936963;R-HSA-936960;R-HSA-879362;R-HSA-981535;R-HSA-936991;R-HSA-450325;R-HSA-936986;R-HSA-203797;R-HSA-975122;R-HSA-202534;R-HSA-975147;R-HSA-450337;R-HSA-975142;R-HSA-450346;R-HSA-975139;R-HSA-937022;R-HSA-450358;R-HSA-2395412;R-HSA-2130194;R-HSA-975160;R-HSA-173626;R-HSA-173631;R-HSA-5621355;R-HSA-879411;R-HS…
R-HSA-2262752	Cellular responses to stress	37	952	0.0667087	1	1	90	381	0.0280622	9606	Homo sapiens	CAMK2B;HIST1H2BJ;EPAS1;HSPB8;CABP1;NPAS2;CHL1;CREB3L1;GRB10;HIST1H2AD;EMB;HIST1H3D;HIST1H1C;EGLN3;GPX3;STAT3;UBE2E1;FOS;PSMC4;JMJD7-PLA2G4B;ALB;MAFK;HIST1H2BG;ATF5;TRIB1;ATP6V0C;MBTPS2;ATF3		R-HSA-3790137;R-HSA-1791131;R-HSA-3790130;R-HSA-8932355;R-HSA-3788725;R-HSA-3788724;R-HSA-9645598;R-HSA-3229089;R-HSA-9640195;R-HSA-1234179;R-HSA-3223200;R-HSA-1234177;R-HSA-9708423;R-HSA-450325;R-HSA-1234183;R-HSA-9653894;R-HSA-1368065;R-HSA-9653893;R-HSA-1791116;R-HSA-1234181;R-HSA-9707523;R-HSA-9646468;R-HSA-3788705;R-HSA-9708557;R-HSA-9708430;R-HSA-9654792;R-HSA-3788708;R-HSA-3229102;R-HSA-32…
R-HSA-1428517	The citric acid (TCA) cycle and respiratory electron transport	1	238	0.0166772	1	1	1	67	0.00493482	9606	Homo sapiens	PDK1		R-HSA-203946
R-HSA-162582	Signal Transduction	182	2997	0.210006	1	1	689	2454	0.180747	9606	Homo sapiens	POGLUT1;WIPF1;WWC1;SERPINE1;WIPF3;SPINT2;F11R;GRPR;PREX2;STK10;RGS5;DOCK11;GJA1;EDNRA;GNAT3;SALL4;MYB;WDR91;ARHGDIB;EPSTI1;GRB10;PIP4K2A;HIST1H2AD;SOX7;PROK1;PDK1;RAG1;CD97;USP2;F2R;GPR37L1;DKK2;RUNX1;DISP2;SPINT1;HECW1;PRKCQ;HIST1H2BG;TRIB1;DGKI;LPPR1;EPHA2;GNAZ;GRB7;PDE1B;EPAS1;NOTCH4;LPAR1;ARHGAP18;PDGFA;KLC3;FLRT2;GRK5;FLRT3;PDGFD;RHPN1;PIP5K1B;MYH11;HIST1H3D;LYN;EGR1;PTCH1;NFATC2;TNFRSF10B;N…		R-HSA-3769401;R-HSA-9701524;R-HSA-9701525;R-HSA-9632918;R-HSA-9604247;R-HSA-1562641;R-HSA-141316;R-HSA-380930;R-HSA-3769392;R-HSA-9701534;R-HSA-392206;R-HSA-380942;R-HSA-8981637;R-HSA-3769397;R-HSA-9701529;R-HSA-9701531;R-HSA-380949;R-HSA-392212;R-HSA-5668932;R-HSA-9021596;R-HSA-420883;R-HSA-203797;R-HSA-3769391;R-HSA-9632906;R-HSA-1250315;R-HSA-9017488;R-HSA-8964241;R-HSA-8964242;R-HSA-9017491;R…
R-HSA-73857	RNA Polymerase II Transcription	85	1694	0.118702	1	1	260	891	0.0656257	9606	Homo sapiens	CPNE9;SERPINE1;PRKAG2;ZNF45;ING5;CTSO;TRIM28;ZNF649;HEY2;MYB;CASP1;PIP4K2A;HIST1H2AD;ZNF248;ZNF446;ZNF324;PDK1;ZNF320;USP2;UBE2E1;KCTD1;FOS;PAX5;RUNX1;ZNF718;HAND2;SNRPG;PRKCQ;ITGA5;HIST1H2BG;SNRPGP15;ZNF676;ZNF114;KCTD15;ZNF234;HDAC4;CAMK2B;ZNF595;HIST1H2BJ;DLX6;NOTCH4;LEF1;DLL1;HDAC9;GRIN2A;MED30;PLAGL1;ZNF626;TP53INP1;SPP1;ZNF547;HIVEP3;SMYD3;ZNF225;HIST1H3D;TFAP2A;ZNF660;ZNF141;ZNF382;TNFRSF1…		R-HSA-8936584;R-HSA-8937097;R-HSA-8938121;R-HSA-8931981;R-HSA-8864395;R-HSA-8951428;R-HSA-8936068;R-HSA-8877192;R-HSA-8956568;R-HSA-8937113;R-HSA-6805620;R-HSA-8937118;R-HSA-6810239;R-HSA-6810238;R-HSA-8951442;R-HSA-8864412;R-HSA-8951443;R-HSA-8939667;R-HSA-6810235;R-HSA-6810234;R-HSA-6810233;R-HSA-8939670;R-HSA-8936599;R-HSA-8936616;R-HSA-8869543;R-HSA-8869542;R-HSA-8956586;R-HSA-5689972;R-HSA-8…
R-HSA-199991	Membrane Trafficking	18	667	0.0467381	1	1	73	219	0.0161302	9606	Homo sapiens	SGIP1;CTSZ;PRKAG2;PLA2G4A;TPD52L1;DNM1;VAMP8;DNM3;GJA1;KLC3;RINL;GJA5;CLTCL1;AP1S3;RAB5A;CD55		R-HSA-8868230;R-HSA-5694418;R-HSA-5694417;R-HSA-5694428;R-HSA-8868236;R-HSA-191636;R-HSA-8867613;R-HSA-8871196;R-HSA-8871194;R-HSA-8871193;R-HSA-5694409;R-HSA-190877;R-HSA-6807877;R-HSA-191654;R-HSA-6807875;R-HSA-376364;R-HSA-191656;R-HSA-8867756;R-HSA-8868651;R-HSA-8867754;R-HSA-8868648;R-HSA-5694439;R-HSA-8868661;R-HSA-8868660;R-HSA-196017;R-HSA-8868659;R-HSA-8868658;R-HSA-190519;R-HSA-432688;R…
R-HSA-211859	Biological oxidations	12	549	0.0384696	1	1	31	188	0.0138469	9606	Homo sapiens	GGT5;GGT6;CYP24A1;CYP21A2;CYP2S1;ALDH1A1;ACSS1;CYP7B1;CES3;PTGS1;SULT2A1		R-HSA-76416;R-HSA-140355;R-HSA-76354;R-HSA-192065;R-HSA-211910;R-HSA-140359;R-HSA-71691;R-HSA-176585;R-HSA-176588;R-HSA-76434;R-HSA-211991;R-HSA-211988;R-HSA-176474;R-HSA-211929;R-HSA-176664;R-HSA-176604;R-HSA-211874;R-HSA-5433072;R-HSA-212005;R-HSA-212004;R-HSA-8943279;R-HSA-8937442;R-HSA-76397;R-HSA-211950;R-HSA-5693691;R-HSA-143468;R-HSA-193964;R-HSA-449911;R-HSA-192051;R-HSA-176631;R-HSA-76475
R-HSA-556833	Metabolism of lipids	63	1444	0.101184	1	1	116	954	0.0702659	9606	Homo sapiens	44623;PRKAG2;CROT;44624;SMPD3;GLIPR1;PIP4K2A;CD36;MFSD2A;SULT2A1;PLA2G12A;HMGCS1;ELOVL2;PLA2G4A;ELOVL6;ABCC9;ACSL4;CYP7B1;MED29;GAL;ACOX2;CYP21A2;PITPNM3;JMJD7-PLA2G4B;PPAP2A;ACOT2;ACSBG1;FAR2;TRIB1;PPM1L;ABCB4;HSD17B3;PLA2G3;NPAS2;PTPLA;PTGS1;UGCG;MED30;SPP1;PIP5K1B;ARSG;GGT5;AKR1C1;FABP2;CYP24A1;FABP6;ALB;GPD1L;PPIL3;RAB5A;NES;MBTPS2		R-HSA-2426149;R-HSA-1655835;R-HSA-1614362;R-HSA-2426150;R-HSA-389889;R-HSA-1482771;R-HSA-111883;R-HSA-193800;R-HSA-5676637;R-HSA-1482759;R-HSA-1368065;R-HSA-1675776;R-HSA-193816;R-HSA-390438;R-HSA-1482547;R-HSA-192036;R-HSA-193064;R-HSA-1676082;R-HSA-192051;R-HSA-1655848;R-HSA-1655851;R-HSA-1482533;R-HSA-193841;R-HSA-266046;R-HSA-1675810;R-HSA-9733545;R-HSA-140355;R-HSA-8871366;R-HSA-192065;R-HSA…
R-HSA-5653656	Vesicle-mediated transport	25	827	0.0579497	1	1	84	252	0.0185608	9606	Homo sapiens	SCARB1;SGIP1;CTSZ;HP;PRKAG2;PLA2G4A;TPD52L1;IGJ;DNM1;VAMP8;DNM3;GJA1;KLC3;COL3A1;RINL;GJA5;CLTCL1;ALB;AP1S3;CD36;APOL1;RAB5A;CD55		R-HSA-8868230;R-HSA-5694418;R-HSA-2512800;R-HSA-5694417;R-HSA-5694428;R-HSA-8868236;R-HSA-2168883;R-HSA-2168885;R-HSA-191636;R-HSA-2168887;R-HSA-2168889;R-HSA-8867613;R-HSA-8871196;R-HSA-8871194;R-HSA-8871193;R-HSA-5694409;R-HSA-190877;R-HSA-2187264;R-HSA-6807877;R-HSA-191654;R-HSA-6807875;R-HSA-376364;R-HSA-191656;R-HSA-8867756;R-HSA-8868651;R-HSA-8867754;R-HSA-2197646;R-HSA-8868648;R-HSA-569443…
R-HSA-72766	Translation	2	339	0.0237545	1	1	5	99	0.00729174	9606	Homo sapiens	EEF1A2;GSPT2		R-HSA-141671;R-HSA-141691;R-HSA-141673;R-HSA-6800138;R-HSA-156909
R-HSA-69278	Cell Cycle, Mitotic	12	596	0.041763	1	1	68	350	0.0257789	9606	Homo sapiens	LYN;FKBPL;HIST1H2BJ;PSMC4;ORC2;UBE2E1;CABLES1;HIST1H2AD;HIST1H2BG;EMB;HIST1H3D		R-HSA-375302;R-HSA-8852354;R-HSA-8942607;R-HSA-1638803;R-HSA-174088;R-HSA-2294574;R-HSA-8852362;R-HSA-174227;R-HSA-174224;R-HSA-69015;R-HSA-2294580;R-HSA-69016;R-HSA-2468287;R-HSA-174104;R-HSA-174105;R-HSA-8854044;R-HSA-174238;R-HSA-2294590;R-HSA-188191;R-HSA-174119;R-HSA-2172678;R-HSA-9686969;R-HSA-174120;R-HSA-174121;R-HSA-174255;R-HSA-8854071;R-HSA-75825;R-HSA-68914;R-HSA-68917;R-HSA-187574;R-…
R-HSA-74160	Gene expression (Transcription)	86	1855	0.129984	1	1	286	1006	0.0740959	9606	Homo sapiens	CPNE9;SERPINE1;PRKAG2;ZNF45;ING5;CTSO;HENMT1;TRIM28;ZNF649;HEY2;MYB;CASP1;PIP4K2A;HIST1H2AD;ZNF248;ZNF446;ZNF324;PDK1;ZNF320;USP2;UBE2E1;KCTD1;FOS;PAX5;RUNX1;ZNF718;HAND2;SNRPG;PRKCQ;ITGA5;HIST1H2BG;SNRPGP15;ZNF676;ZNF114;KCTD15;ZNF234;HDAC4;CAMK2B;ZNF595;HIST1H2BJ;DLX6;NOTCH4;LEF1;DLL1;HDAC9;GRIN2A;MED30;PLAGL1;ZNF626;TP53INP1;SPP1;ZNF547;HIVEP3;SMYD3;ZNF225;HIST1H3D;TFAP2A;ZNF660;ZNF141;ZNF382;…		R-HSA-8936584;R-HSA-5334097;R-HSA-8937097;R-HSA-427527;R-HSA-8938121;R-HSA-5334099;R-HSA-8931981;R-HSA-8864395;R-HSA-8951428;R-HSA-8936068;R-HSA-433672;R-HSA-427528;R-HSA-8877192;R-HSA-8956568;R-HSA-8937113;R-HSA-6805620;R-HSA-8937118;R-HSA-6810239;R-HSA-6810238;R-HSA-8951442;R-HSA-8864412;R-HSA-8951443;R-HSA-8939667;R-HSA-6810235;R-HSA-6810234;R-HSA-6810233;R-HSA-8939670;R-HSA-8936599;R-HSA-8936…
R-HSA-597592	Post-translational protein modification	67	1598	0.111975	1	1	82	526	0.038742	9606	Homo sapiens	CSF1;CTSZ;ADAMTS4;TRIM28;EVA1A;ADAMTSL4;HIST1H2AD;RNF152;ADAMTS9;ST6GAL1;FBXO2;FGG;USP2;UBE2E1;UBE2E2;MITF;PRSS56;KLHL41;RNF144A;WBSCR17;GAL;B3GNT7;EEF1A2;SPARCL1;HIST1H2BG;KCTD15;HDAC4;HIST1H2BJ;EPAS1;SDC2;NTM;THY1;CABP1;AFP;LYPD5;THSD1;FBXO40;ADAMTS15;ADAMTS18;DPH3;ST8SIA4;SPP1;MLEC;GCNT4;ARSG;APOL1;CD55;OPCML;TFAP2A;GALNT6;UBE2H;GALNT4;ST8SIA1;FUCA1;KLHL20;PSMC4;TNIP3;ALB;ASB9;PAF1;RAB5A;SPSB4		R-HSA-8956040;R-HSA-1614362;R-HSA-901006;R-HSA-5694418;R-HSA-5173192;R-HSA-913675;R-HSA-4615872;R-HSA-5694417;R-HSA-5694428;R-HSA-5690845;R-HSA-8931974;R-HSA-3234081;R-HSA-975902;R-HSA-8956184;R-HSA-8955289;R-HSA-3232162;R-HSA-6786034;R-HSA-5689539;R-HSA-5696960;R-HSA-4085033;R-HSA-5665871;R-HSA-8938770;R-HSA-8942099;R-HSA-8942101;R-HSA-8938773;R-HSA-5694409;R-HSA-8956200;R-HSA-977071;R-HSA-89526…
R-HSA-8953854	Metabolism of RNA	16	783	0.0548665	1	1	47	187	0.0137733	9606	Homo sapiens	ANP32A;TEX10;SMG9;WDR12;TSEN2;SUPT5H;GSPT2;LSM3;SMG5;H19;PSMC4;SNRPG;ENPP2;EMB;SNRPGP15;PPIL3;APOBEC3B		R-HSA-72130;R-HSA-75079;R-HSA-75081;R-HSA-75080;R-HSA-72139;R-HSA-75083;R-HSA-927813;R-HSA-75082;R-HSA-111437;R-HSA-72143;R-HSA-428296;R-HSA-111438;R-HSA-77585;R-HSA-77073;R-HSA-191763;R-HSA-927836;R-HSA-77586;R-HSA-429845;R-HSA-191830;R-HSA-77077;R-HSA-6791219;R-HSA-450387;R-HSA-6791218;R-HSA-927832;R-HSA-77078;R-HSA-77081;R-HSA-927830;R-HSA-77083;R-HSA-83677;R-HSA-77085;R-HSA-429978;R-HSA-92788…
R-HSA-168256	Immune System	128	2684	0.188074	1	1	434	1623	0.11954	9606	Homo sapiens	CSF1;CLEC4M;FRMPD3;WIPF1;WIPF3;HP;CLU;IFIT3;IL27RA;HERC5;STK10;GRB10;AP1S3;PDK1;RAG1;CD97;FBXO2;UBE2E1;UBE2E2;ATAD3B;KLHL41;OSCAR;BCAM;CRISPLD2;PADI2;PRKCQ;TRIB1;CARD11;CD1D;C2;CD79A;FBXO40;KLC3;C7;IRAK2;NLRP4;MLEC;TNFRSF14;LONRF1;HIST1H3D;LYN;BTNL9;EGR1;UBE2H;FUCA1;NFATC2;NFATC1;ISG15;KLHL20;TG;TNFSF4;RNF182;KLRD1;NFKBIB;SNAP25;CTSZ;ADAMTS4;GLIPR1;CTSO;CASP4;CASP1;CTSH;CD36;CD33;CTSB;DUSP4;ANXA1…		R-HSA-975879;R-HSA-936963;R-HSA-936960;R-HSA-8863895;R-HSA-936991;R-HSA-936986;R-HSA-203797;R-HSA-9605259;R-HSA-2317314;R-HSA-389158;R-HSA-6786124;R-HSA-937022;R-HSA-8937656;R-HSA-430135;R-HSA-8937654;R-HSA-937034;R-HSA-6786095;R-HSA-6800426;R-HSA-937050;R-HSA-6800434;R-HSA-6786097;R-HSA-1168456;R-HSA-9630923;R-HSA-937044;R-HSA-1168459;R-HSA-2530429;R-HSA-6784006;R-HSA-983150;R-HSA-8863973;R-HSA-…
R-HSA-1640170	Cell Cycle	12	734	0.051433	1	1	93	449	0.0330706	9606	Homo sapiens	LYN;FKBPL;HIST1H2BJ;PSMC4;ORC2;UBE2E1;CABLES1;HIST1H2AD;HIST1H2BG;EMB;HIST1H3D		R-HSA-69891;R-HSA-375302;R-HSA-8852354;R-HSA-8942607;R-HSA-1638803;R-HSA-174088;R-HSA-2294574;R-HSA-8852362;R-HSA-264458;R-HSA-174227;R-HSA-174224;R-HSA-912408;R-HSA-9670149;R-HSA-69015;R-HSA-2294580;R-HSA-69016;R-HSA-2468287;R-HSA-174104;R-HSA-174105;R-HSA-8854044;R-HSA-174238;R-HSA-2294590;R-HSA-188191;R-HSA-174119;R-HSA-2172678;R-HSA-176298;R-HSA-9686969;R-HSA-174120;R-HSA-174121;R-HSA-174255;…
R-HSA-392499	Metabolism of proteins	86	2205	0.154509	1	1	120	798	0.0587759	9606	Homo sapiens	CSF1;CTSZ;ZDHHC2;ADAMTS4;TRIM28;EVA1A;ADAMTSL4;GNAT3;HIST1H2AD;CTSH;RNF152;ADAMTS9;CPA3;ST6GAL1;MME;FBXO2;FGG;USP2;UBE2E1;UBE2E2;PAX6;MITF;MYRIP;PRSS56;KLHL41;RNF144A;WBSCR17;GAL;B3GNT7;EEF1A2;SPARCL1;HIST1H2BG;KCTD15;HDAC4;HIST1H2BJ;EPAS1;SDC2;NTM;GATA6;THY1;CABP1;AFP;LYPD5;GSPT2;THSD1;FBXO40;ADAMTS15;GNG4;ADAMTS18;DPH3;ST8SIA4;SPP1;MLEC;TSPAN5;GCNT4;ARSG;APOL1;CD55;HIST1H3D;OPCML;TFAP2A;GALNT6;…		R-HSA-8956040;R-HSA-1614362;R-HSA-913675;R-HSA-8850560;R-HSA-8931974;R-HSA-3234081;R-HSA-975902;R-HSA-8955289;R-HSA-9010074;R-HSA-4085033;R-HSA-2028294;R-HSA-5665871;R-HSA-5689972;R-HSA-6807877;R-HSA-6807875;R-HSA-8852130;R-HSA-8852129;R-HSA-5693807;R-HSA-4084999;R-HSA-8956106;R-HSA-977228;R-HSA-5173005;R-HSA-390470;R-HSA-5691411;R-HSA-977224;R-HSA-9010113;R-HSA-9023171;R-HSA-8956103;R-HSA-976734…
R-HSA-1643685	Disease	76	2431	0.170345	1	1	211	1632	0.120203	9606	Homo sapiens	SNAP25;WIPF1;WIPF3;ADAMTS4;SPRED2;TRIM28;ADAMTSL4;GNAT3;HEY2;CASP1;HIST1H2AD;EMB;CD36;AP1S3;ADAMTS9;PDK1;ST6GAL1;FGG;UBE2E1;BGN;ABCC9;CYP7B1;DUSP9;DKK2;HCK;GAL;MRAS;PPP1R3C;NRG4;CYP21A2;NHLRC1;HIST1H2BG;CHST3;HDAC4;CAMK2B;GNAZ;CEBPD;HIST1H2BJ;SDC2;DERL3;NOTCH4;ABCB4;LRP5;PDGFA;ADCY2;DLL1;HDAC9;THSD1;NEURL1B;ADAMTS15;ERBB3;SV2A;GNG4;ADAMTS18;FYN;GPC4;HIST1H3D;STRA6;GGT5;LYN;F12;STAT3;ISG15;SUPT5H;…		R-HSA-180739;R-HSA-5244500;R-HSA-182279;R-HSA-5244503;R-HSA-3656254;R-HSA-5244506;R-HSA-9664664;R-HSA-182286;R-HSA-5602885;R-HSA-9664646;R-HSA-5096538;R-HSA-5602383;R-HSA-167459;R-HSA-9665699;R-HSA-9665697;R-HSA-167478;R-HSA-9665701;R-HSA-9665700;R-HSA-9665705;R-HSA-167481;R-HSA-9665709;R-HSA-2769007;R-HSA-5244424;R-HSA-2769008;R-HSA-5244428;R-HSA-5602353;R-HSA-5250616;R-HSA-9697018;R-HSA-2737728…
R-HSA-5663205	Infectious disease	29	1357	0.0950879	1	1	90	752	0.0553878	9606	Homo sapiens	SNAP25;GNAZ;CEBPD;HIST1H2BJ;WIPF1;WIPF3;ADCY2;TRIM28;GNG4;GNAT3;SV2A;CASP1;HIST1H2AD;FYN;EMB;AP1S3;HIST1H3D;LYN;GGT5;ST6GAL1;ISG15;SUPT5H;TSHR;HCK;ABI2;PSMC4;HIST1H2BG;RAB5A		R-HSA-194818;R-HSA-9664275;R-HSA-9660819;R-HSA-180739;R-HSA-2029469;R-HSA-2029466;R-HSA-5244500;R-HSA-182279;R-HSA-2029465;R-HSA-5244503;R-HSA-5244506;R-HSA-9660824;R-HSA-182286;R-HSA-167181;R-HSA-9660828;R-HSA-5250880;R-HSA-5250884;R-HSA-167191;R-HSA-9664261;R-HSA-180885;R-HSA-200858;R-HSA-2197691;R-HSA-167192;R-HSA-2197690;R-HSA-168857;R-HSA-167196;R-HSA-167197;R-HSA-448678;R-HSA-167459;R-HSA-1…
R-HSA-1430728	Metabolism	113	3646	0.255483	1	1	268	2260	0.166458	9606	Homo sapiens	ISCA1;ENPP2;PIP4K2A;SULT2A1;PDK1;MFSD2A;CSGALNACT1;CACNA2D2;ENTPD8;PIPOX;ACSL4;PPP1R3C;ACOT2;NHLRC1;FAR2;TRIB1;CES3;SDC2;ABCB4;PLA2G3;LPL;NPAS2;UGCG;MED30;TTPA;PIP5K1B;ARSG;GGT5;GGT6;EHD3;CYP2S1;ALB;NOSTRIN;CSPG4;NES;SERINC2;RAB5A;SNAP25;44623;KCNC2;PRKAG2;CROT;44624;SMPD3;GLIPR1;CD36;HS3ST3B1;CHST9;PLA2G12A;HMGCS1;ELOVL2;BGN;PLA2G4A;CTPS2;ELOVL6;AMPD2;ABCC9;CYP7B1;MED29;ITPKC;GAL;ACOX2;B3GNT7;CY…		R-HSA-1655835;R-HSA-1614362;R-HSA-1482771;R-HSA-71691;R-HSA-5676637;R-HSA-1482759;R-HSA-211991;R-HSA-1368065;R-HSA-211988;R-HSA-2022919;R-HSA-1675776;R-HSA-176664;R-HSA-164377;R-HSA-9638064;R-HSA-212005;R-HSA-192036;R-HSA-212004;R-HSA-8943279;R-HSA-193064;R-HSA-192051;R-HSA-1655848;R-HSA-1655851;R-HSA-1675810;R-HSA-2090079;R-HSA-140355;R-HSA-76354;R-HSA-192065;R-HSA-1605724;R-HSA-140359;R-HSA-148…
R-HSA-71291	Metabolism of amino acids and derivatives	6	665	0.046598	1	1	6	285	0.0209914	9606	Homo sapiens	EHD3;PSMC4;CHDH;PIPOX;SERINC2;ASS1		R-HSA-70881;R-HSA-70577;R-HSA-353125;R-HSA-8932980;R-HSA-6797961;R-HSA-6783880
